# Supplementary material for: TsOH-catalyzed dehydroxylative cross-coupling of alcohols with phenols: rapid access to propofol derivatives
Source: Royal Society of Chemistry journal article supplement (doi:10.1039/d4ra04674a), 2024-01-01

# **TsOH-Catalyzed Dehydroxylative Cross-Coupling of Alcohols with Phenols: Rapid Access to Propofol Derivatives**

Yuqiu Liang,<sup>a</sup> Chengxiu, Liu,<sup>a</sup> Youchun Li,<sup>\*b</sup> Lu Ouyang<sup>\*a</sup>

<sup>a</sup> *School of Pharmacy, Gannan Medical University, Ganzhou 341000, Jiangxi Province, P. R. China. oyl3074@163.com*

<sup>b</sup> *The Affiliated Ganzhou Hospital, Jiangxi Medical College, Nanchang University, Ganzhou 341000, Jiangxi Province, P. R. China. liyouchun2007@163.com*

## **Supporting Information**

### **Table of Contents**

|                                                                                   |            |
|-----------------------------------------------------------------------------------|------------|
| <b>A. General Methods .....</b>                                                   | <b>S2</b>  |
| <b>B. Procedure for dehydroxylative coupling of alcohols and phenols.....</b>     | <b>S2</b>  |
| <b>C. Procedure for dehydroxylative coupling of alcohols and aryl ethers.....</b> | <b>S2</b>  |
| <b>D. Procedure for gram-scale experiment.....</b>                                | <b>S3</b>  |
| <b>E. Control experiments.....</b>                                                | <b>S3</b>  |
| <b>F. Analytical Data.....</b>                                                    | <b>S5</b>  |
| <b>G. References .....</b>                                                        | <b>S23</b> |
| <b>H. NMR Spectra .....</b>                                                       | <b>S25</b> |

## A. General Methods

Unless otherwise stated, all reactions were magnetically stirred and conducted under air and applied dried Schlenk tubes under confined conditions. All solvents and reagents were used as received from commercial suppliers unless otherwise indicated. Column chromatography was carried out using silica gel (100-400 mesh) and detected at 254 nm. All  $^1\text{H}$  NMR,  $^{13}\text{C}$  NMR,  $^{19}\text{F}$  NMR spectra for compound characterization were recorded on a Bruker AVANCE-NEO 400 WB spectrometer in a suitable deuterated solvent unless specified otherwise. Chemical shifts were given in parts per million (ppm,  $\delta$ ), referenced to the solvent peak of  $\text{CDCl}_3$ , defined at  $\delta = 7.26$  ( $^1\text{H}$  NMR), defined at  $\delta = 77.16$  ( $^{13}\text{C}$  NMR). Coupling constants were quoted in Hz (J).  $^1\text{H}$  NMR spectroscopy splitting patterns were designated as singlet (s), doublet (d), triplet (t), and quartet (q). HRMS was performed on a high-resolution mass spectrometer (LCMS-IT-TOF). Melt points were measured with WRR melting point apparatus.

## B. Procedure for dehydroxylative coupling of alcohols with phenols

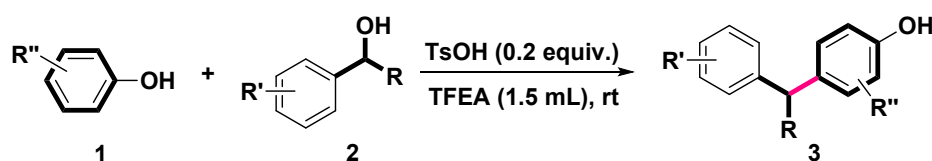

In the Schlenk tube, **1** (0.5 mmol), **2** (1.0 equiv., 0.5 mmol), TsOH (20 mol %, 0.1 mmol), TFEA (1.5 mL) were added. The mixture was stirred at room temperature for 1 h under confined conditions. After the reaction was completed, the mixture was diluted with EtOAc (5.0 mL) carefully quenched with 5.0 mL of saturated  $\text{NaHCO}_3$  solution. To determine the separation yield of product, the mixture was extracted with EtOAc (10.0 mL  $\times$  3 times), the organic layers were combined, washed with saturated NaCl, and dried with anhydrous  $\text{MgSO}_4$ . After removal of the EtOAc under vacuum, the crude product was purified by column chromatography on silica gel with hexanes or petroleum ether/ethyl acetate (5:1 to 200:1) to give the desired products.

## C. Procedure for dehydroxylative coupling of alcohols with aryl ethers

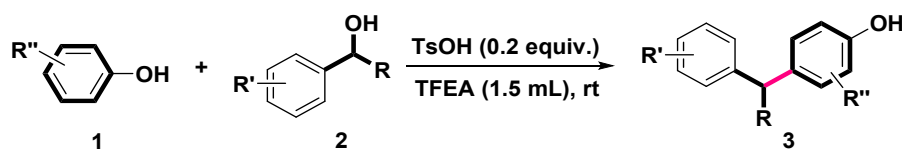

In the Schlenk tube, **4** (0.5 mmol), **2** (1.0 equiv., 0.5 mmol), TsOH (20 mol %, 0.1 mmol), TFEA (1.5 mL) were added. The mixture was stirred at room temperature for 1 h under confined conditions. After the reaction was completed, the mixture was diluted with EtOAc (5.0 mL) carefully quenched with 5.0 mL of saturated NaHCO<sub>3</sub> solution. To determine the separation yield of product, the mixture was extracted with EtOAc (10.0 mL × 3 times), the organic layers were combined, washed with saturated NaCl, and dried with anhydrous MgSO<sub>4</sub>. After removal of the EtOAc under vacuum, the crude product was purified by column chromatography on silica gel with hexanes or petroleum ether/ethyl acetate (5:1 to 200:1) to give the desired products.

#### D. Procedure for gram-scale experiment

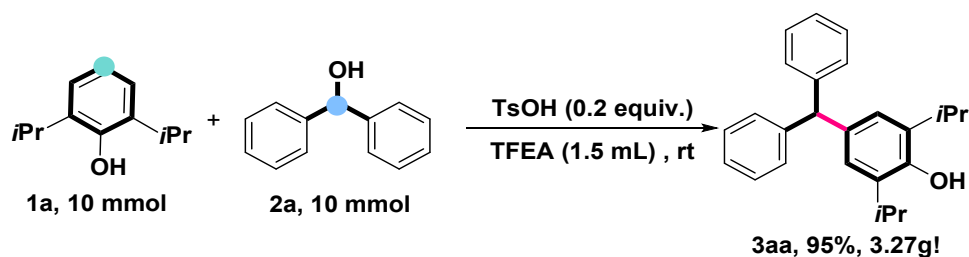

In the Schlenk tube were added **1a** (10.0 mmol), **2a** (1.0 equiv., 10 mmol), TsOH (20 mol%), TFEA (30.0 mL). The mixture was stirred at room temperature for 1 h under confined conditions. After the reaction was completed, the mixture was diluted with EtOAc (50.0 mL) carefully quenched with 50.0 mL of saturated NaHCO<sub>3</sub> solution. To determine the separation yield of product, the mixture was extracted with EtOAc (50.0 mL × 3 times), the organic layers were combined and washed with saturated NaCl and dried with anhydrous MgSO<sub>4</sub>. After removal of the EtOAc under vacuum, the crude product was purified by column chromatography on silica gel with petroleum ether/ethyl acetate (50:1) to give the desired product.

#### E. Control experiments.

The chiral alcohol **2k** was employed in this catalytic system to access detailed mechanistic process. As anticipated, only racemic product **3ak** was produced using (*R*)-(-)-1-phenylethanol (**2k**) to react with propofol **1a**, which evidenced the formation of benzyl carbocationic intermediate (Scheme S1).

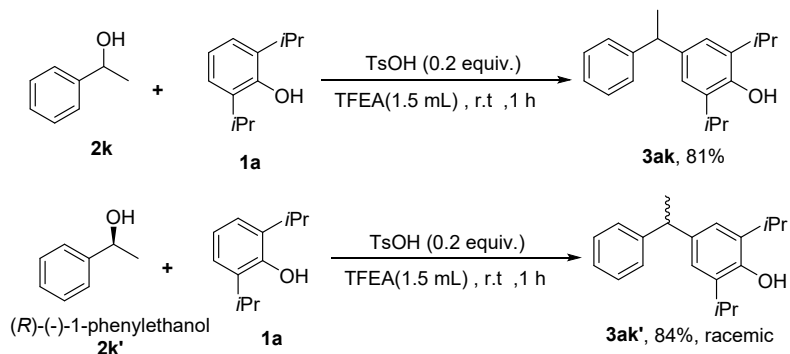

**Scheme S1** Chiral alcohol employed in this deoxygenative cross-coupling.

### Racemic product of 1-phenylethanol (**2k**)

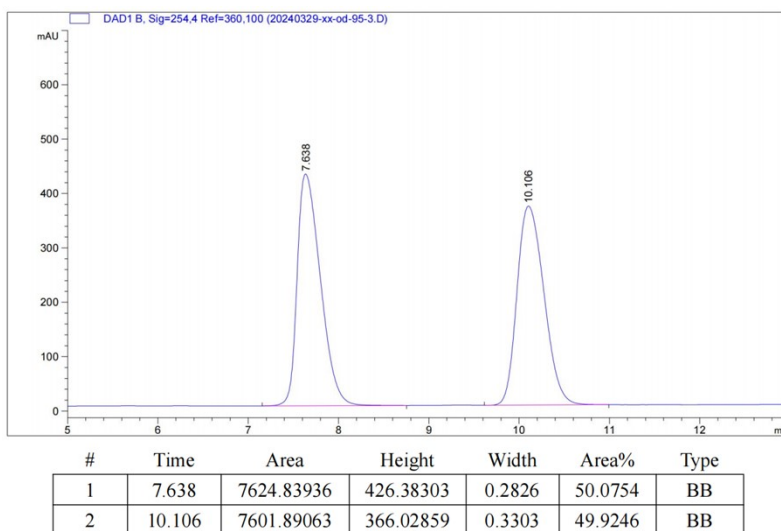

### Chiral product of 1-phenylethanol (**2k'**)

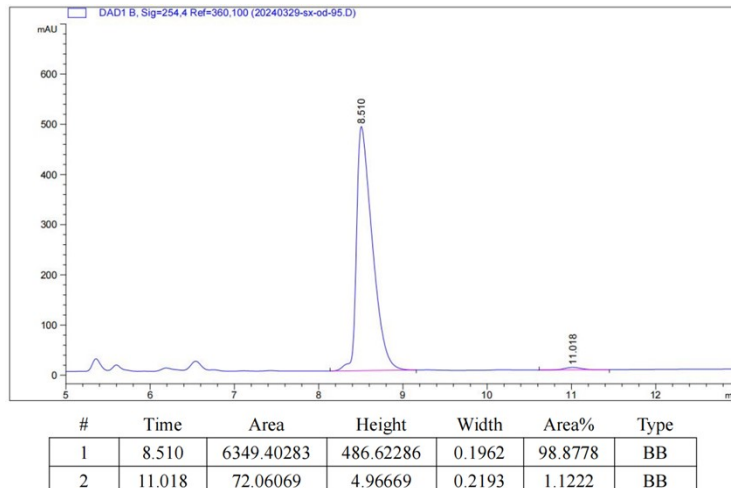

### Racemic product of (3ak)

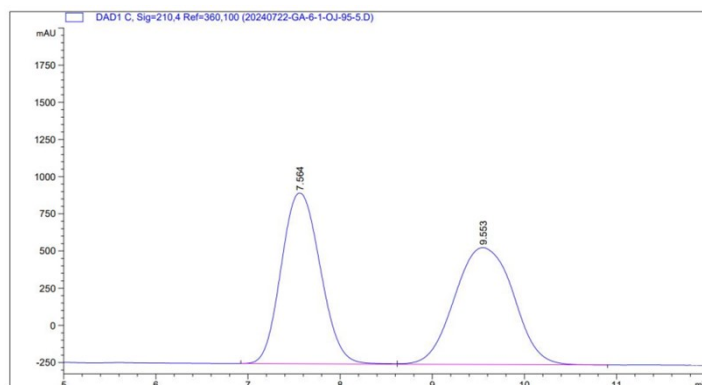

| # | Time  | Area      | Height     | Width  | Area%   | Type |
|---|-------|-----------|------------|--------|---------|------|
| 1 | 7.564 | 3.37772e4 | 1147.66479 | 0.4654 | 49.1978 | BV   |
| 2 | 9.553 | 3.48787e4 | 785.29932  | 0.7202 | 50.8022 | VB   |

### Chiral product of (3ak')

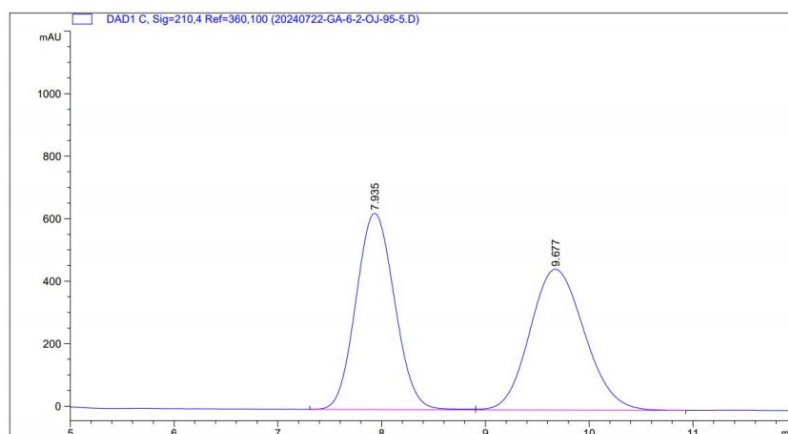

| # | Time  | Area      | Height    | Width  | Area%   | Type |
|---|-------|-----------|-----------|--------|---------|------|
| 1 | 7.935 | 1.61806e4 | 627.44012 | 0.4069 | 49.5944 | BV   |
| 2 | 9.677 | 1.64452e4 | 450.49347 | 0.5759 | 50.4056 | VB   |

## F. Analytical Data

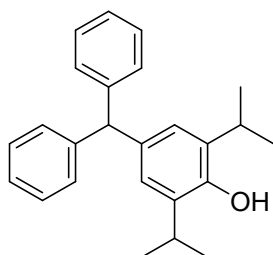

**4-benzhydryl-2,6-diisopropylphenol (3aa)**<sup>1</sup>: Prepared in 98% yield (168.1 mg) as a white solid; m.p. 102-104 °C.  $R_f = 0.49$  (petroleum ether/ethyl acetate = 10/1, v/v). <sup>1</sup>H NMR (400 MHz, CDCl<sub>3</sub>)  $\delta$  7.23 (t,  $J = 7.4$  Hz, 4H), 7.13 (dd,  $J = 17.8, 7.2$  Hz, 6H),

6.80 (s, 2H), 5.47 (s, 1H), 4.66 (s, 1H), 3.12-3.02 (m, 2H), 1.15 (d,  $J = 7.0$  Hz, 12H).  
 $^{13}\text{C}$  NMR (100 MHz,  $\text{CDCl}_3$ )  $\delta$  148.3, 144.6, 135.5, 133.3, 129.3, 128.1, 126.0, 124.5, 56.6, 27.2, 22.7.

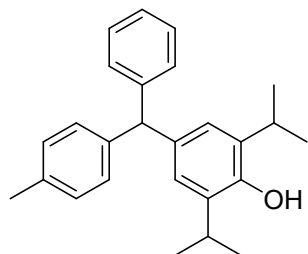

**2,6-diisopropyl-4-(phenyl(*p*-tolyl)methyl)phenol (3ab):** Prepared in 92% yield (164.8 mg) as a white solid; m.p. 114-117 °C.  $R_f = 0.53$  (petroleum ether/ethyl acetate = 10/1, v/v).  $^1\text{H}$  NMR (400 MHz,  $\text{CDCl}_3$ )  $\delta$  7.23 (t,  $J = 7.4$  Hz, 2H), 7.16 (d,  $J = 7.4$  Hz, 1H), 7.12-7.08 (m, 2H), 7.06 (d,  $J = 7.9$  Hz, 2H), 6.99 (d,  $J = 7.9$  Hz, 2H), 6.80 (s, 2H), 5.43 (s, 1H), 4.66 (s, 1H), 3.12-3.02 (m, 2H), 2.29 (s, 3H), 1.16 (dd,  $J = 6.9, 1.7$  Hz, 12H).  $^{13}\text{C}$  NMR (100 MHz,  $\text{CDCl}_3$ )  $\delta$  148.3, 144.9, 141.6, 135.7, 135.4, 133.2, 129.3, 129.2, 128.8, 128.1, 125.9, 124.5, 56.2, 27.3, 22.7, 21.0. HRMS-ESI ( $m/z$ ):  $[\text{M}+\text{H}]^+$  Calcd for  $\text{C}_{26}\text{H}_{30}\text{O}$  357.2224; Found 357.2222.

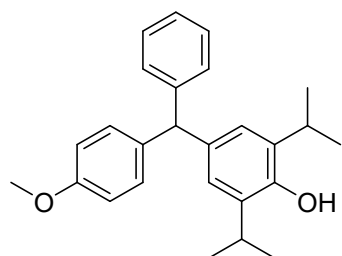

**2,6-diisopropyl-4-((4-methoxyphenyl)(phenyl)methyl)phenol (3ac)<sup>2</sup>:** Prepared in 86% yield (160.9 mg) as a colourless oil.  $R_f = 0.49$  (petroleum ether/ethyl acetate = 10/1, v/v).  $^1\text{H}$  NMR (400 MHz,  $\text{CDCl}_3$ )  $\delta$  7.25 (t,  $J = 7.4$  Hz, 2H), 7.18 (d,  $J = 7.3$  Hz, 1H), 7.13-7.07 (m, 2H), 7.05-6.99 (m, 2H), 6.85-6.74 (m, 4H), 5.42 (s, 1H), 4.70 (s, 1H), 3.77 (s, 3H), 3.14-3.04 (m, 2H), 1.17 (d,  $J = 6.9$  Hz, 12H).  $^{13}\text{C}$  NMR (100 MHz,  $\text{CDCl}_3$ )  $\delta$  157.8, 148.3, 145.0, 136.9, 135.8, 133.2, 130.2, 129.3, 128.1, 125.9, 124.5, 113.5, 55.8, 55.2, 27.3, 22.7 (d,  $J = 1.7$  Hz).

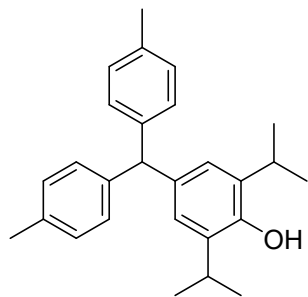

**4-benzhydryl-2,6-diisopropylphenol (3ad)**<sup>3</sup>: Prepared in 96% yield (179.2 mg) as a colourless oil.  $R_f = 0.55$  (petroleum ether/ethyl acetate = 10/1, v/v).  $^1\text{H NMR}$  (400 MHz,  $\text{CDCl}_3$ )  $\delta$  7.32-7.23 (m, 8H), 7.06 (s, 2H), 5.64 (s, 1H), 4.92 (s, 1H), 3.37-3.27 (m, 2H), 2.52 (s, 6H), 1.41 (d,  $J = 7.0$  Hz, 12H).  $^{13}\text{C NMR}$  (100 MHz,  $\text{CDCl}_3$ )  $\delta$  148.2, 141.9, 135.9, 135.3, 133.2, 129.1, 128.8, 124.5, 55.9, 27.3, 22.7, 20.9.

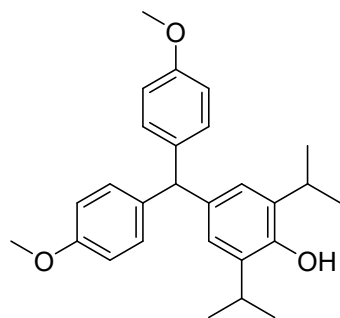

**4-(di-*p*-tolylmethyl)-2,6-diisopropylphenol (3ae)**: Prepared in 84% yield (168.9 mg) as a white solid; m.p.107-109 °C.  $R_f = 0.33$  (petroleum ether/ethyl acetate = 5/1, v/v).  $^1\text{H NMR}$  (400 MHz,  $\text{CDCl}_3$ )  $\delta$  7.01 (d,  $J = 8.7$  Hz, 4H), 6.83-6.76 (m, 6H), 5.37 (s, 1H), 4.72 (s, 1H), 3.76 (s, 6H), 3.14-3.04 (m, 2H), 1.17 (d,  $J = 6.9$  Hz, 12H).  $^{13}\text{C NMR}$  (100 MHz,  $\text{CDCl}_3$ )  $\delta$  157.7, 148.2, 137.2, 136.1, 133.2, 130.1, 124.4, 113.4, 55.1, 27.3, 22.7. HRMS-ESI (m/z):  $[\text{M}+\text{H}]^+$  Calcd for  $\text{C}_{27}\text{H}_{32}\text{O}_3$  403.2279; Found 403.2277.

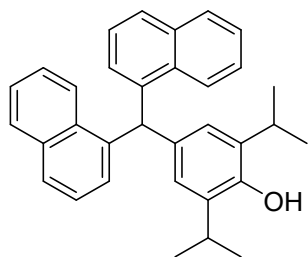

**4-(di(naphthalen-1-yl)methyl)-2,6-diisopropylphenol (3af)**: Prepared in 82% yield (181.5 mg) as a white solid; m.p.198-200 °C.  $R_f = 0.44$  (petroleum ether/ethyl acetate

= 10/1, v/v).  $^1\text{H}$  NMR (400 MHz,  $\text{CDCl}_3$ )  $\delta$  7.98 (d,  $J = 8.5$  Hz, 2H), 7.84 (d,  $J = 8.1$  Hz, 2H), 7.72 (d,  $J = 8.2$  Hz, 2H), 7.46-7.38 (m, 2H), 7.32 (dt,  $J = 19.3, 8.1$  Hz, 4H), 6.93 (d,  $J = 7.2$  Hz, 2H), 6.86 (s, 1H), 6.82 (s, 2H), 4.67 (s, 1H), 3.10-3.00 (m, 2H), 1.11 (d,  $J = 6.9$  Hz, 12H).  $^{13}\text{C}$  NMR (100 MHz,  $\text{CDCl}_3$ )  $\delta$  148.4, 140.5, 134.8, 133.9, 133.4, 131.8, 128.7, 127.5, 127.1, 126.1, 125.3, 125.3, 124.9, 124.2, 49.2, 27.3, 22.6. HRMS-ESI (m/z):  $[\text{M}+\text{H}]^+$  Calcd for  $\text{C}_{33}\text{H}_{32}\text{O}$  443.2380; Found 443.2379.

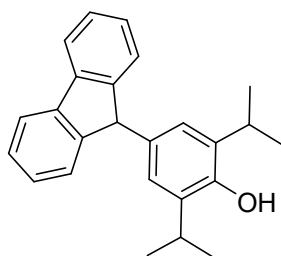

**4-(9H-fluoren-9-yl)-2,6-diisopropylphenol (3ag):** Prepared in 60% yield (103.4 mg) as a colourless oil.  $R_f = 0.42$  (petroleum ether/ethyl acetate = 50/1, v/v).  $^1\text{H}$  NMR (400 MHz,  $\text{CDCl}_3$ )  $\delta$  7.79 (dd,  $J = 7.6, 1.2$  Hz, 2H), 7.39-7.32 (m, 4H), 7.27-7.23 (m, 2H), 6.78 (s, 2H), 4.99 (s, 1H), 4.68 (s, 1H), 3.14-3.04 (m, 2H), 1.19 (d,  $J = 6.9$  Hz, 12H).  $^{13}\text{C}$  NMR (100 MHz,  $\text{CDCl}_3$ )  $\delta$  148.9, 148.1, 140.8, 133.7, 133.0, 127.1, 127.0, 125.2, 123.3, 119.7, 54.3, 27.3, 22.7. HRMS-ESI (m/z):  $[\text{M}+\text{H}]^+$  Calcd for  $\text{C}_{25}\text{H}_{26}\text{O}$  341.1911; Found 341.1909.

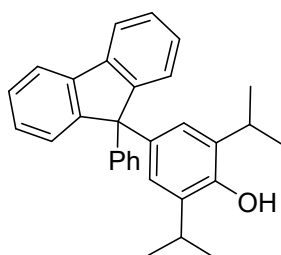

**2,6-diisopropyl-4-(9-phenyl-9H-fluoren-9-yl)phenol (3ah):** Prepared in 95% yield (198.1 mg) as a white solid; m.p. 157-159°C.  $R_f = 0.38$  (petroleum ether/ethyl acetate = 10/1, v/v).  $^1\text{H}$  NMR (400 MHz,  $\text{CDCl}_3$ )  $\delta$  7.72 (d,  $J = 7.5$  Hz, 2H), 7.39 (d,  $J = 7.6$  Hz, 2H), 7.28 (t,  $J = 6.8$  Hz, 2H), 7.21 (t,  $J = 7.5$  Hz, 2H), 7.17-7.09 (m, 5H), 6.90 (s, 2H), 3.07-2.97 (m, 2H), 1.09 (d,  $J = 7.0$  Hz, 12H).  $^{13}\text{C}$  NMR (100 MHz,  $\text{CDCl}_3$ )  $\delta$  151.8, 148.6, 146.6, 140.0, 137.2, 132.9, 128.0, 127.9, 127.5, 127.2, 126.3, 126.0,



123.6, 120.0, 65.3, 27.3, 22.6. HRMS-ESI (m/z): [M+H]<sup>+</sup> Calcd for C<sub>31</sub>H<sub>30</sub>O 417.2224; Found 417.2223.

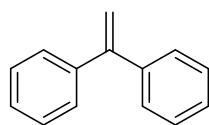

**ethene-1,1-diyl dibenzene (3ai)**<sup>4</sup>: Prepared in 47% yield (42.0 mg) as a colourless oil. R<sub>f</sub> = 0.44 (petroleum ether/ethyl acetate = 50/1, v/v). <sup>1</sup>H NMR (400 MHz, CDCl<sub>3</sub>) δ 7.32 (td, *J* = 5.9, 5.3, 3.0 Hz, 10H), 5.45 (s, 2H). <sup>13</sup>C NMR (100 MHz, CDCl<sub>3</sub>) δ 150.0, 141.4, 128.2, 128.1, 127.7, 114.3.

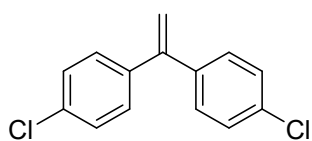

**4,4'-(ethene-1,1-diyl)bis(chlorobenzene) (3aj)**<sup>5</sup>: Prepared in 86% yield (106.4 mg) as a colourless oil. R<sub>f</sub> = 0.44 (petroleum ether/ethyl acetate = 10/1, v/v). <sup>1</sup>H NMR (400 MHz, CDCl<sub>3</sub>) δ 7.34-7.16 (m, 8H), 5.43 (s, 2H). <sup>13</sup>C NMR (100 MHz, CDCl<sub>3</sub>) δ 147.8, 139.4, 133.8, 129.4, 128.4, 115.1.

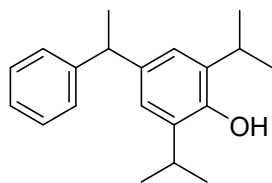

**2,6-diisopropyl-4-(1-phenylethyl)phenol (3ak)**: Prepared in 70% yield (98.4 mg) as a colourless oil. R<sub>f</sub> = 0.44 (petroleum ether/ethyl acetate = 10/1, v/v). <sup>1</sup>H NMR (400 MHz, CDCl<sub>3</sub>) δ 7.29-7.19 (m, 4H), 7.18-7.10 (m, 1H), 6.90 (s, 2H), 4.65 (s, 1H), 4.08 (q, *J* = 7.2 Hz, 1H), 3.15-3.06 (m, 2H), 1.61 (d, *J* = 7.2 Hz, 3H), 1.23 (d, *J* = 7.9 Hz, 12H). <sup>13</sup>C NMR (100 MHz, CDCl<sub>3</sub>) δ 148.2, 147.0, 138.0, 133.3, 128.2, 127.5, 125.7, 122.6, 44.6, 27.3, 22.7 (d, *J* = 1.4 Hz), 22.3. HRMS-ESI (m/z): [M+H]<sup>+</sup> Calcd for C<sub>20</sub>H<sub>26</sub>O 281.1911; Found 281.1908.

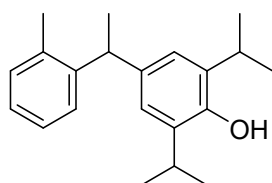

**2,6-diisopropyl-4-(1-(*o*-tolyl)ethyl)phenol (3al):** Prepared in 94% yield (139.6 mg) as a colourless oil.  $R_f = 0.48$  (petroleum ether/ethyl acetate = 10/1, v/v).  $^1\text{H NMR}$  (400 MHz,  $\text{CDCl}_3$ )  $\delta$  7.25-7.21 (m, 1H), 7.16 (td,  $J = 7.6, 7.0, 2.3$  Hz, 1H), 7.13-7.06 (m, 2H), 6.84 (s, 2H), 4.62 (s, 1H), 4.25 (q,  $J = 7.2$  Hz, 1H), 3.14-3.04 (m, 2H), 2.27 (s, 3H), 1.58 (d,  $J = 7.2$  Hz, 3H), 1.21 (dd,  $J = 6.9, 1.8$  Hz, 12H).  $^{13}\text{C NMR}$  (100 MHz,  $\text{CDCl}_3$ )  $\delta$  148.0, 144.7, 137.8, 135.8, 133.2, 130.2, 126.5, 125.9, 125.7, 122.7, 40.6, 27.3, 22.7 (d,  $J = 1.4$  Hz), 22.2, 19.7. HRMS-ESI ( $m/z$ ):  $[\text{M}+\text{H}]^+$  Calcd for  $\text{C}_{21}\text{H}_{28}\text{O}$  295.2067; Found 295.2065.

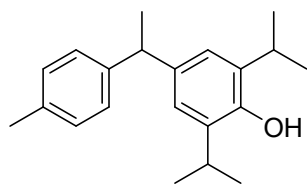

**2,6-diisopropyl-4-(1-(*p*-tolyl)ethyl)phenol (3am):** Prepared in 94% yield (139.3 mg) as a colourless oil.  $R_f = 0.48$  (petroleum ether/ethyl acetate = 10/1, v/v).  $^1\text{H NMR}$  (400 MHz,  $\text{CDCl}_3$ )  $\delta$  7.08 (q,  $J = 8.2$  Hz, 4H), 6.90 (s, 2H), 4.63 (s, 1H), 4.04 (q,  $J = 7.2$  Hz, 1H), 3.14-3.05 (m, 2H), 2.29 (s, 3H), 1.59 (d,  $J = 7.2$  Hz, 3H), 1.23 (d,  $J = 7.0$  Hz, 12H).  $^{13}\text{C NMR}$  (100 MHz,  $\text{CDCl}_3$ )  $\delta$  148.1, 144.1, 138.2, 135.1, 133.3, 128.9, 127.3, 122.6, 44.2, 27.3, 22.7, 22.4, 20.9. HRMS-ESI ( $m/z$ ):  $[\text{M}+\text{H}]^+$  Calcd for  $\text{C}_{21}\text{H}_{28}\text{O}$  295.2067; Found 295.2063.

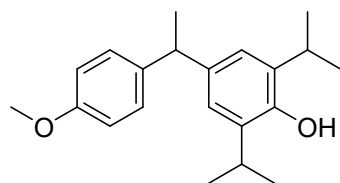

**2,6-diisopropyl-4-(1-(4-methoxyphenyl)ethyl)phenol (3an)<sup>6</sup>:** Prepared in 81% yield (125.6 mg) as a colourless oil.  $R_f = 0.32$  (petroleum ether/ethyl acetate = 10/1, v/v).  $^1\text{H NMR}$  (400 MHz,  $\text{CDCl}_3$ )  $\delta$  7.13 (d,  $J = 8.7$  Hz, 2H), 6.89 (s, 2H), 6.81 (d,  $J = 8.7$  Hz, 2H), 4.68 (s, 1H), 4.03 (q,  $J = 7.2$  Hz, 1H), 3.76 (s, 3H), 3.16-3.06 (m, 2H), 1.58 (d,  $J = 7.3$  Hz, 3H), 1.22 (d,  $J = 6.9$  Hz, 12H).  $^{13}\text{C NMR}$  (100 MHz,  $\text{CDCl}_3$ )  $\delta$  157.6, 148.1, 139.2, 138.4, 133.3, 128.3, 122.5, 113.6, 55.2, 43.7, 27.3, 22.7 (d,  $J = 1.8$  Hz), 22.5.

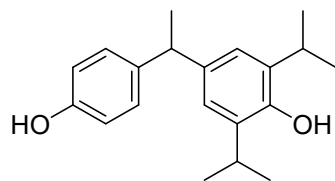

**4-(1-(4-hydroxyphenyl)ethyl)-2,6-diisopropylphenol (3ao):** Prepared in 72% yield (107.2 mg) as a white solid; m.p.89-91 °C.  $R_f = 0.27$  (petroleum ether/ethyl acetate = 3/1, v/v).  $^1\text{H NMR}$  (400 MHz,  $\text{CDCl}_3$ )  $\delta$  7.06 (d,  $J = 8.2$  Hz, 2H), 6.88 (s, 2H), 6.72 (d,  $J = 8.3$  Hz, 2H), 5.35 (s, 1H), 4.75 (s, 1H), 4.01 (q,  $J = 7.2$  Hz, 1H), 3.16-3.06 (m, 2H), 1.57 (d,  $J = 7.2$  Hz, 3H), 1.21 (d,  $J = 6.9$  Hz, 12H).  $^{13}\text{C NMR}$  (100 MHz,  $\text{CDCl}_3$ )  $\delta$  153.4, 148.0, 139.3, 138.5, 133.4, 128.6, 122.5, 115.0, 43.7, 27.3, 22.7(d,  $J = 1.6$  Hz), 22.5. HRMS-ESI (m/z):  $[\text{M}+\text{H}]^+$  Calcd for  $\text{C}_{20}\text{H}_{26}\text{O}_2$  297.1860; Found 297.1857.

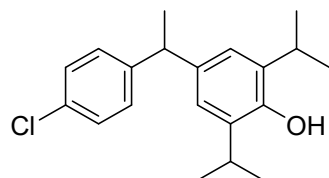

**4-(1-(4-chlorophenyl)ethyl)-2,6-diisopropylphenol (3ap):** Prepared in 79% yield (125.6 mg) as a colourless oil.  $R_f = 0.44$  (petroleum ether/ethyl acetate = 10/1, v/v).  $^1\text{H NMR}$  (400 MHz,  $\text{CDCl}_3$ )  $\delta$  7.22 (d,  $J = 8.5$  Hz, 2H), 7.13 (d,  $J = 8.4$  Hz, 2H), 6.86 (s, 2H), 4.67 (s, 1H), 4.05 (q,  $J = 7.2$  Hz, 1H), 3.16-3.06 (m, 2H), 1.58 (d,  $J = 7.2$  Hz, 3H), 1.23 (d,  $J = 6.9$  Hz, 12H).  $^{13}\text{C NMR}$  (100 MHz,  $\text{CDCl}_3$ )  $\delta$  148.3, 145.6, 137.5, 133.5, 131.4, 128.9, 128.3, 122.5, 44.0, 27.3, 22.7(d,  $J = 2.0$  Hz), 22.2. HRMS-ESI (m/z):  $[\text{M}+\text{H}]^+$  Calcd for  $\text{C}_{20}\text{H}_{25}\text{ClO}$  315.1521; Found 315.1522.

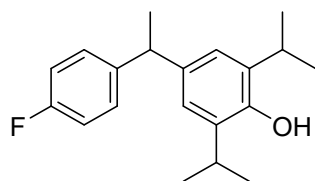

**4-(1-(4-fluorophenyl)ethyl)-2,6-diisopropylphenol (3aq):** Prepared in 94% yield (140.8 mg) as a colourless oil.  $R_f = 0.46$  (petroleum ether/ethyl acetate = 10/1, v/v).  $^1\text{H NMR}$  (400 MHz,  $\text{CDCl}_3$ )  $\delta$  7.16 (dd,  $J = 8.5, 5.5$  Hz, 2H), 6.94 (t,  $J = 8.7$  Hz, 2H), 6.87 (s, 2H), 4.68 (s, 1H), 4.06 (q,  $J = 7.2$  Hz, 1H), 3.16-3.06 (m, 2H), 1.59 (d,  $J = 7.2$  Hz, 3H), 1.23 (d,  $J = 6.9$  Hz, 12H).  $^{13}\text{C NMR}$  (100 MHz,  $\text{CDCl}_3$ )  $\delta$  161.1 (d,  $J = 243.4$  Hz), 148.2, 142.7 (d,  $J = 3.2$  Hz), 137.9, 133.4, 128.8 (d,  $J = 7.7$  Hz), 122.5, 114.9 (d,

$J = 21.0$  Hz), 43.8, 27.3, 22.7 (d,  $J = 1.8$  Hz), 22.4.  $^{19}\text{F}$  NMR (377 MHz,  $\text{CDCl}_3$ )  $\delta$  - 117.8. HRMS-ESI (m/z):  $[\text{M}+\text{H}]^+$  Calcd for  $\text{C}_{20}\text{H}_{25}\text{FO}$  299.1817; Found 299.1815.

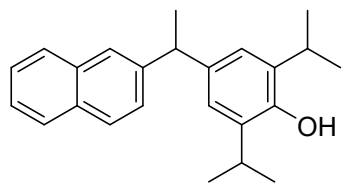

**2,6-diisopropyl-4-(1-(naphthalen-2-yl)ethyl)phenol (3ar):** Prepared in 95% yield (158.2 mg) as a white solid; m.p. 112-114 °C.  $R_f = 0.44$  (petroleum ether/ethyl acetate = 10/1, v/v).  $^1\text{H}$  NMR (400 MHz,  $\text{CDCl}_3$ )  $\delta$  8.14 (dd,  $J = 7.6, 2.0$  Hz, 1H), 7.82 (dd,  $J = 7.7, 1.8$  Hz, 1H), 7.69 (d,  $J = 8.1$  Hz, 1H), 7.47-7.37 (m, 3H), 7.35-7.30 (m, 1H), 6.95 (s, 2H), 4.88 (q,  $J = 7.1$  Hz, 1H), 4.64 (s, 1H), 3.13-3.03 (m, 2H), 1.73 (d,  $J = 7.1$  Hz, 3H), 1.19 (t,  $J = 7.0$  Hz, 12H).  $^{13}\text{C}$  NMR (100 MHz,  $\text{CDCl}_3$ )  $\delta$  148.1, 142.7, 137.9, 133.9, 133.3, 131.6, 128.7, 126.6, 125.7, 125.5, 125.2, 124.2, 123.8, 122.8, 40.0, 27.3, 22.7 (d,  $J = 6.2$  Hz). HRMS-ESI (m/z):  $[\text{M}+\text{H}]^+$  Calcd for  $\text{C}_{24}\text{H}_{28}\text{O}$  331.2067; Found 331.2068.

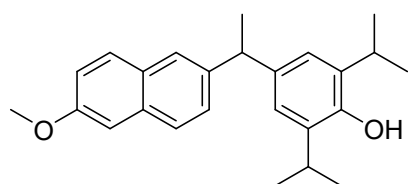

**2,6-diisopropyl-4-(1-(6-methoxynaphthalen-2-yl)ethyl)phenol (3as):** Prepared in 84% yield (151.7 mg) as a colourless oil.  $R_f = 0.36$  (petroleum ether/ethyl acetate = 10/1, v/v).  $^1\text{H}$  NMR (400 MHz,  $\text{CDCl}_3$ )  $\delta$  7.70-7.58 (m, 3H), 7.29 (dd,  $J = 8.5, 1.9$  Hz, 1H), 7.14-7.06 (m, 2H), 6.94 (s, 2H), 4.67 (s, 1H), 4.20 (q,  $J = 7.2$  Hz, 1H), 3.87 (s, 3H), 3.14-3.04 (m, 2H), 1.68 (d,  $J = 7.2$  Hz, 3H), 1.22 (d,  $J = 6.9$  Hz, 12H).  $^{13}\text{C}$  NMR (100 MHz,  $\text{CDCl}_3$ )  $\delta$  157.2, 148.2, 142.2, 138.1, 133.3, 133.0, 129.2, 128.9, 127.3, 126.6, 125.0, 122.7, 118.5, 105.6, 55.2, 44.4, 27.3, 22.7 (d,  $J = 2.7$  Hz), 22.3. HRMS-ESI (m/z):  $[\text{M}+\text{H}]^+$  Calcd for  $\text{C}_{25}\text{H}_{30}\text{O}_2$  361.2173; Found 361.2172.

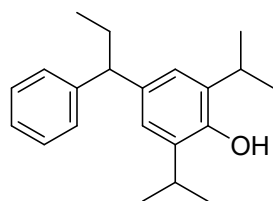

**2,6-diisopropyl-4-(1-(6-methoxynaphthalen-2-yl)ethyl)phenol (3at):** Prepared in 87% yield (128.1 mg) as a colourless oil.  $R_f = 0.44$  (petroleum ether/ethyl acetate = 10/1, v/v).  $^1\text{H NMR}$  (400 MHz,  $\text{CDCl}_3$ )  $\delta$  7.28-7.21 (m, 4H), 7.18-7.11 (m, 1H), 6.91 (s, 2H), 4.63 (s, 1H), 3.71 (t,  $J = 7.8$  Hz, 1H), 3.15-3.10 (m, 2H), 2.07-1.99 (m, 2H), 1.23 (dd,  $J = 6.9, 1.5$  Hz, 12H), 0.88 (t,  $J = 7.3$  Hz, 3H).  $^{13}\text{C NMR}$  (100 MHz,  $\text{CDCl}_3$ )  $\delta$  148.1, 145.7, 137.0, 133.2, 128.2, 127.8, 125.7, 122.8, 53.1, 29.1, 27.3, 22.7, 12.9. HRMS-ESI (m/z):  $[\text{M}+\text{H}]^+$  Calcd for  $\text{C}_{21}\text{H}_{28}\text{O}$  295.2067; Found 295.2066.

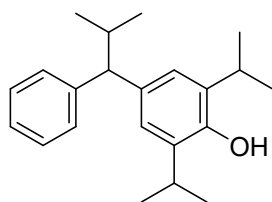

**2,6-diisopropyl-4-(2-methyl-1-phenylpropyl)phenol (3au):** Prepared in 83% yield (128.5 mg) as a colourless oil.  $R_f = 0.44$  (petroleum ether/ethyl acetate = 10/1, v/v).  $^1\text{H NMR}$  (400 MHz,  $\text{CDCl}_3$ )  $\delta$  7.29-7.21 (m, 4H), 7.11 (t,  $J = 7.0$  Hz, 1H), 6.94 (s, 2H), 4.59 (s, 1H), 3.31 (d,  $J = 10.7$  Hz, 1H), 3.14-3.04 (m, 2H), 2.42 (dq,  $J = 17.3, 6.5$  Hz, 1H), 1.23 (dd,  $J = 6.9, 2.3$  Hz, 12H), 0.85 (dd,  $J = 8.8, 6.5$  Hz, 6H).  $^{13}\text{C NMR}$  (100 MHz,  $\text{CDCl}_3$ )  $\delta$  148.0, 145.6, 136.7, 133.2, 128.3, 127.9, 125.6, 122.9, 60.6, 32.2, 27.2, 22.8 (d,  $J = 6.9$  Hz), 21.9 (d,  $J = 3.6$  Hz). HRMS-ESI (m/z):  $[\text{M}+\text{H}]^+$  Calcd for  $\text{C}_{22}\text{H}_{30}\text{O}$  309.2224; Found 309.2223.

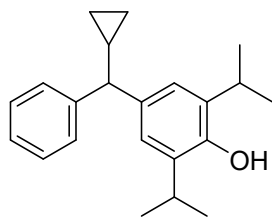

**2,6-diisopropyl-4-(2-methyl-1-phenylpropyl)phenol (3av):** Prepared in 87% yield (134.5 mg) as a colourless oil.  $R_f = 0.44$  (petroleum ether/ethyl acetate = 10/1, v/v).  $^1\text{H NMR}$  (400 MHz,  $\text{CDCl}_3$ )  $\delta$  7.29-7.22 (m, 4H), 7.16 (td,  $J = 6.1, 5.5, 2.7$  Hz, 1H), 6.94 (s, 2H), 4.65 (s, 1H), 3.18-3.06 (m, 3H), 1.22 (d,  $J = 7.0$  Hz, 12H), 0.69-0.57 (m, 2H), 0.34-0.22 (m, 2H).  $^{13}\text{C NMR}$  (100 MHz,  $\text{CDCl}_3$ )  $\delta$  148.2, 145.7, 136.9, 133.1, 128.1, 128.1, 125.8, 123.2, 55.3, 27.3, 22.7 (d,  $J = 3.1$  Hz), 17.0, 5.3 (d,  $J = 14.0$  Hz). HRMS-ESI (m/z):  $[\text{M}+\text{H}]^+$  Calcd for  $\text{C}_{22}\text{H}_{28}\text{O}$  307.2067; Found 307.2066.

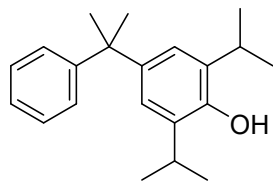

**2,6-diisopropyl-4-(2-phenylpropan-2-yl)phenol (3aw):** Prepared in 97% yield (143.3 mg) as a colourless oil.  $R_f = 0.49$  (petroleum ether/ethyl acetate = 10/1, v/v).  $^1\text{H NMR}$  (400 MHz,  $\text{CDCl}_3$ )  $\delta$  7.23 (d,  $J = 1.6$  Hz, 4H), 7.16-7.10 (m, 1H), 6.91 (d,  $J = 1.6$  Hz, 2H), 4.66 (s, 1H), 3.16-3.06 (m, 2H), 1.67 (s, 6H), 1.20 (d,  $J = 6.9$  Hz, 12H).  $^{13}\text{C NMR}$  (100 MHz,  $\text{CDCl}_3$ )  $\delta$  151.1, 147.7, 142.3, 132.7, 127.8, 126.7, 125.3, 121.9, 42.6, 31.0, 27.4, 22.7. HRMS-ESI (m/z):  $[\text{M}+\text{H}]^+$  Calcd for  $\text{C}_{21}\text{H}_{28}\text{O}$  295.2067; Found 295.2065.

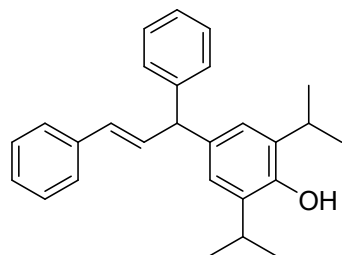

**4-(1,3-diphenylallyl)-2,6-diisopropylphenol (3ax):** Prepared in 68% yield (124.9 mg) as a colourless oil.  $R_f = 0.44$  (petroleum ether/ethyl acetate = 10/1, v/v).  $^1\text{H NMR}$  (400 MHz,  $\text{CDCl}_3$ )  $\delta$  7.36 (d,  $J = 7.4$  Hz, 2H), 7.32-7.16 (m, 8H), 6.92 (s, 2H), 6.66 (dd,  $J = 15.8, 7.6$  Hz, 1H), 6.34 (d,  $J = 15.8$  Hz, 1H), 4.82 (d,  $J = 7.6$  Hz, 1H), 3.16-3.06 (m, 2H), 1.22 (d,  $J = 6.9$  Hz, 12H).  $^{13}\text{C NMR}$  (100 MHz,  $\text{CDCl}_3$ )  $\delta$  148.5, 144.0, 137.5, 135.1, 133.6, 133.3, 130.8, 128.5, 128.4, 128.3, 127.1, 126.3, 126.2, 123.7, 54.0, 27.3, 22.7. HRMS-ESI (m/z):  $[\text{M}+\text{H}]^+$  Calcd for  $\text{C}_{27}\text{H}_{30}\text{O}$  369.2224; Found 369.2223.

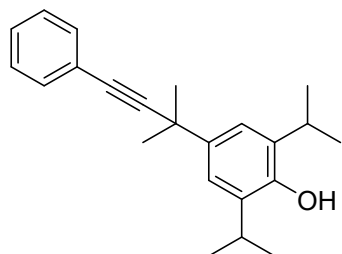

**2,6-diisopropyl-4-(2-methyl-4-phenylbut-3-yn-2-yl)phenol (3ay):** Prepared in 76% yield (122.1 mg) as a colourless oil.  $R_f = 0.44$  (petroleum ether/ethyl acetate = 10/1, v/v).  $^1\text{H NMR}$  (400 MHz,  $\text{CDCl}_3$ )  $\delta$  7.47-7.42 (m, 2H), 7.35-7.26 (m, 5H), 4.72 (s,

1H), 3.22-3.11 (m, 2H), 1.66 (s, 6H), 1.30 (d,  $J = 6.9$  Hz, 12H).  $^{13}\text{C}$  NMR (100 MHz,  $\text{CDCl}_3$ )  $\delta$  148.4, 138.8, 133.1, 131.5, 128.2, 127.5, 124.1, 120.7, 97.2, 36.2, 31.9, 27.5, 22.8. HRMS-ESI ( $m/z$ ):  $[\text{M}+\text{H}]^+$  Calcd for  $\text{C}_{23}\text{H}_{28}\text{O}$  319.2067; Found 319.2066.

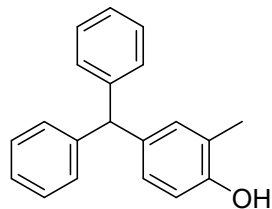

**4-benzhydryl-2-methylphenol (3ba):** Prepared in 80% yield (109.0 mg) as a colourless oil.  $R_f = 0.32$  (petroleum ether/ethyl acetate = 10/1, v/v).  $^1\text{H}$  NMR (400 MHz,  $\text{CDCl}_3$ )  $\delta$  7.28-7.22 (m, 4H), 7.20-7.14 (m, 2H), 7.11-7.07 (m, 4H), 6.87 (d,  $J = 2.3$  Hz, 1H), 6.76 (dd,  $J = 8.2, 2.3$  Hz, 1H), 6.60 (d,  $J = 8.2$  Hz, 1H), 5.44 (s, 1H), 4.85 (s, 1H), 2.14 (s, 3H).  $^{13}\text{C}$  NMR (100 MHz,  $\text{CDCl}_3$ )  $\delta$  152.1, 144.2, 136.1, 132.0, 129.3, 128.2, 127.9, 126.1, 123.6, 114.6, 56.0, 15.8. HRMS-ESI ( $m/z$ ):  $[\text{M}+\text{H}]^+$  Calcd for  $\text{C}_{20}\text{H}_{18}\text{O}$  273.1285; Found 273.1284.

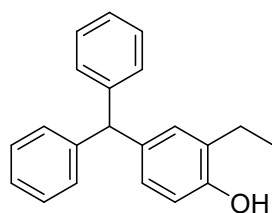

**4-benzhydryl-2-ethylphenol (3ca):** Prepared in 87% yield (125.9 mg) as a colourless oil.  $R_f = 0.30$  (petroleum ether/ethyl acetate = 10/1, v/v).  $^1\text{H}$  NMR (400 MHz,  $\text{CDCl}_3$ )  $\delta$  7.25 (dd,  $J = 8.1, 6.5$  Hz, 4H), 7.19 (d,  $J = 7.3$  Hz, 2H), 7.13-7.06 (m, 4H), 6.90 (d,  $J = 2.3$  Hz, 1H), 6.75 (dd,  $J = 8.2, 2.3$  Hz, 1H), 6.60 (d,  $J = 8.2$  Hz, 1H), 5.46 (s, 1H), 4.82 (s, 1H), 2.54 (q,  $J = 7.6$  Hz, 2H), 1.14 (t,  $J = 7.6$  Hz, 3H).  $^{13}\text{C}$  NMR (100 MHz,  $\text{CDCl}_3$ )  $\delta$  151.7, 144.3, 136.1, 130.4, 129.7, 129.3, 128.2, 127.7, 126.1, 114.8, 56.0, 23.0, 14.0. HRMS-ESI ( $m/z$ ):  $[\text{M}+\text{H}]^+$  Calcd for  $\text{C}_{21}\text{H}_{20}\text{O}$  287.1441; Found 287.1440.

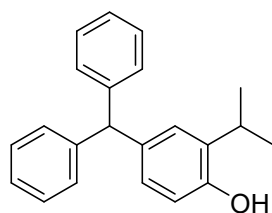

**4-benzhydryl-2-isopropylphenol (3da)**: Prepared in 71% yield (106.8 mg) as a colourless oil.  $R_f = 0.29$  (petroleum ether/ethyl acetate = 10/1, v/v).  $^1\text{H NMR}$  (400 MHz,  $\text{CDCl}_3$ )  $\delta$  7.30-7.22 (m, 4H), 7.21-7.16 (m, 2H), 7.13-7.06 (m, 4H), 6.97 (d,  $J = 2.3$  Hz, 1H), 6.73 (dd,  $J = 8.2, 2.3$  Hz, 1H), 6.59 (d,  $J = 8.2$  Hz, 1H), 5.48 (s, 1H), 4.75 (s, 1H), 3.19-3.09 (m, 1H), 1.16 (d,  $J = 6.9$  Hz, 6H).  $^{13}\text{C NMR}$  (100 MHz,  $\text{CDCl}_3$ )  $\delta$  151.1, 144.4, 136.1, 134.1, 129.3, 128.2, 127.6, 127.4, 126.1, 114.9, 56.2, 27.1, 22.5. HRMS-ESI (m/z):  $[\text{M}+\text{H}]^+$  Calcd for  $\text{C}_{22}\text{H}_{22}\text{O}$  301.1598; Found 301.1597.

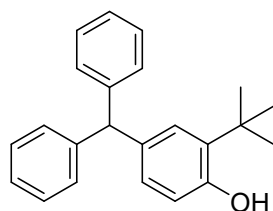

**4-benzhydryl-2-(tert-butyl)phenol (3ea)**<sup>7</sup>: Prepared in 81% yield (128.4 mg) as a colourless oil.  $R_f = 0.30$  (petroleum ether/ethyl acetate = 10/1, v/v).  $^1\text{H NMR}$  (400 MHz,  $\text{CDCl}_3$ )  $\delta$  7.24 (t,  $J = 7.4$  Hz, 4H), 7.20-7.13 (m, 2H), 7.10 (d,  $J = 7.0$  Hz, 4H), 7.04 (d,  $J = 2.3$  Hz, 1H), 6.72 (dd,  $J = 8.1, 2.2$  Hz, 1H), 6.46 (d,  $J = 8.1$  Hz, 1H), 5.46 (s, 1H), 1.32 (s, 9H).  $^{13}\text{C NMR}$  (100 MHz,  $\text{CDCl}_3$ )  $\delta$  152.5, 144.5, 135.7, 135.5, 129.3, 128.3, 128.2, 127.6, 126.1, 116.2, 56.3, 34.5, 29.5.

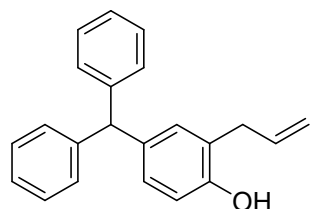

**4-benzhydryl-2-methylphenol (3fa)**: Prepared in 73% yield (108.4 mg) as a colourless oil.  $R_f = 0.29$  (petroleum ether/ethyl acetate = 10/1, v/v).  $^1\text{H NMR}$  (400 MHz,  $\text{CDCl}_3$ )  $\delta$  7.29-7.21 (m, 4H), 7.17 (t,  $J = 7.3$  Hz, 2H), 7.09 (dd,  $J = 7.2, 1.8$  Hz, 4H), 6.87 (d,  $J = 2.3$  Hz, 1H), 6.81 (dd,  $J = 8.2, 2.3$  Hz, 1H), 6.68 (d,  $J = 8.2$  Hz, 1H), 5.95 (ddt,  $J = 16.7, 10.2, 6.3$  Hz, 1H), 5.46 (s, 1H), 5.14-5.05 (m, 2H), 5.02 (s, 1H), 3.31 (d,  $J = 6.4$  Hz, 2H).  $^{13}\text{C NMR}$  (100 MHz,  $\text{CDCl}_3$ )  $\delta$  152.5, 144.2, 136.4, 136.2, 131.4, 129.3, 128.7, 128.2, 126.1, 125.0, 116.4, 115.6, 56.0. HRMS-ESI (m/z):  $[\text{M}+\text{H}]^+$  Calcd for  $\text{C}_{22}\text{H}_{20}\text{O}$  299.1441; Found 299.1440.



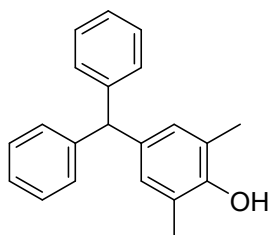

**4-benzhydryl-2,6-dimethylphenol (3ga)**<sup>8</sup>: Prepared in 95% yield (136.2 mg) as a white solid; m.p.124-126 °C.  $R_f = 0.48$  (petroleum ether/ethyl acetate = 10/1, v/v).  $^1\text{H}$  NMR (400 MHz,  $\text{CDCl}_3$ )  $\delta$  7.23 (t,  $J = 7.4$  Hz, 4H), 7.17-7.12 (m, 2H), 7.12-7.07 (m, 4H), 6.70 (s, 2H), 5.40 (s, 1H), 4.60 (s, 1H), 2.11 (s, 6H).  $^{13}\text{C}$  NMR (100 MHz,  $\text{CDCl}_3$ )  $\delta$  150.5, 144.3, 135.4, 129.4, 129.3, 128.1, 126.0, 122.8, 56.0, 15.9.

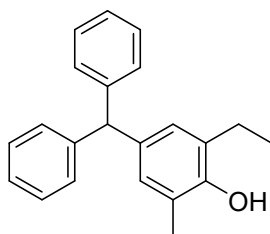

**4-benzhydryl-2-ethyl-6-methylphenol (3ha)**: Prepared in 93% yield (141.1 mg) as a white solid; m.p.148-150 °C.  $R_f = 0.52$  (petroleum ether/ethyl acetate = 10/1, v/v).  $^1\text{H}$  NMR (400 MHz,  $\text{CDCl}_3$ )  $\delta$  7.26 (dd,  $J = 8.1, 6.7$  Hz, 4H), 7.22-7.16 (m, 2H), 7.11 (dd,  $J = 7.0, 1.8$  Hz, 4H), 6.81-6.65 (m, 2H), 5.43 (s, 1H), 4.53 (s, 1H), 2.55 (q,  $J = 7.6$  Hz, 2H), 2.16 (s, 3H), 1.16 (t,  $J = 7.5$  Hz, 3H).  $^{13}\text{C}$  NMR (100 MHz,  $\text{CDCl}_3$ )  $\delta$  150.1, 144.4, 135.6, 129.3, 128.2, 128.0, 126.1, 122.7, 56.2, 23.2, 16.0, 14.1. HRMS-ESI (m/z):  $[\text{M}+\text{H}]^+$  Calcd for  $\text{C}_{22}\text{H}_{22}\text{O}$  301.1598; Found 301.1597.

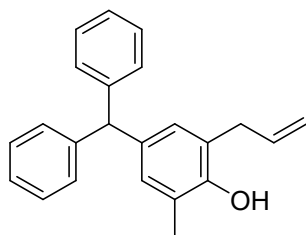

**2-allyl-4-benzhydryl-6-methylphenol (3ia)**: Prepared in 89% yield (140.1 mg) as a colourless oil.  $R_f = 0.44$  (petroleum ether/ethyl acetate = 10/1, v/v).  $^1\text{H}$  NMR (400 MHz,  $\text{CDCl}_3$ )  $\delta$  7.24 (t,  $J = 7.5$  Hz, 4H), 7.17 (d,  $J = 7.3$  Hz, 2H), 7.10 (d,  $J = 6.8$  Hz, 4H), 6.73 (dd,  $J = 23.1, 2.3$  Hz, 2H), 5.93 (ddt,  $J = 16.6, 10.0, 6.3$  Hz, 1H), 5.42 (s, 1H), 5.18-5.06 (m, 2H), 4.91 (s, 1H), 3.29 (d,  $J = 6.4$  Hz, 2H), 2.13 (s, 3H).  $^{13}\text{C}$  NMR (100 MHz,  $\text{CDCl}_3$ )  $\delta$  151.0, 144.3, 136.5, 135.6, 130.2, 129.3, 129.0, 128.2, 126.1,

124.1, 124.0, 116.5, 56.0, 35.7, 16.0. HRMS-ESI (m/z): [M+H]<sup>+</sup> Calcd for C<sub>23</sub>H<sub>22</sub>O 313.1598; Found 313.1599.

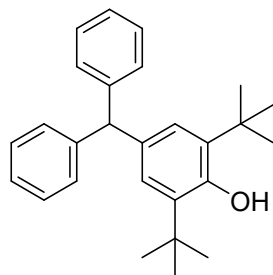

**4-benzhydryl-2,6-di-*tert*-butylphenol (3ja)<sup>9</sup>**: Prepared in 96% yield (178.2 mg) as a white solid; m.p.141-143 °C. R<sub>f</sub> = 0.51 (petroleum ether/ethyl acetate = 10/1, v/v). <sup>1</sup>H NMR (400 MHz, CDCl<sub>3</sub>) δ 7.24 (dd, *J* = 8.3, 6.8 Hz, 4H), 7.18-7.09 (m, 6H), 6.91 (s, 2H), 5.45 (s, 1H), 5.06 (s, 1H), 1.35 (s, 18H). <sup>13</sup>C NMR (100 MHz, CDCl<sub>3</sub>) δ 152.1, 144.8, 135.4, 134.1, 129.4, 128.1, 126.0, 56.8, 34.3, 30.3.

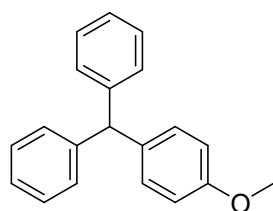

**((4-methoxyphenyl)methylene)dibenzene (5aa)<sup>10</sup>**: Prepared in 59% yield (80.6 mg) as a colourless oil. R<sub>f</sub> = 0.44 (petroleum ether/ethyl acetate = 50/1, v/v). <sup>1</sup>H NMR (400 MHz, CDCl<sub>3</sub>) δ 7.28-7.24 (m, 4H), 7.21-7.18 (m, 2H), 7.10 (dd, *J* = 7.0, 1.8 Hz, 4H), 7.04-6.99 (m, 2H), 6.84-6.77 (m, 2H), 5.49 (s, 1H), 3.75 (s, 3H). <sup>13</sup>C NMR (100 MHz, CDCl<sub>3</sub>) δ 157.9, 144.2, 136.0, 130.3, 129.3, 128.2, 126.2, 113.6, 55.9, 55.1.

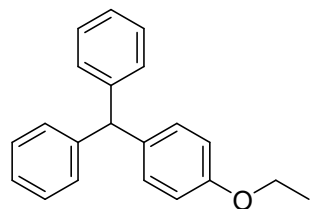

**((4-ethoxyphenyl)methylene)dibenzene (5ab)<sup>11</sup>**: Prepared in 72% yield (103.6 mg) as a colourless oil. R<sub>f</sub> = 0.48 (petroleum ether/ethyl acetate = 50/1, v/v). <sup>1</sup>H NMR (400 MHz, CDCl<sub>3</sub>) δ 7.25 (dd, *J* = 8.2, 6.6 Hz, 4H), 7.20-7.15 (m, 2H), 7.13-7.04 (m, 4H), 7.04-6.96 (m, 2H), 6.84-6.76 (m, 2H), 5.48 (s, 1H), 3.97 (q, *J* = 7.0 Hz, 2H), 1.37 (t, *J*

= 7.0 Hz, 3H).  $^{13}\text{C}$  NMR (100 MHz,  $\text{CDCl}_3$ )  $\delta$  157.3, 144.2, 135.9, 130.3, 129.3, 128.2, 126.1, 114.1, 63.3, 56.0, 14.8.

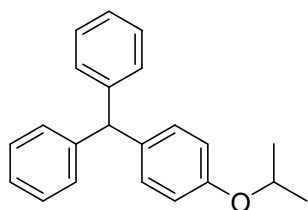

**((4-isopropoxyphenyl)methylene)dibenzene (5ac)**<sup>12</sup>: Prepared in 76% yield (114.2 mg) as a colourless oil.  $R_f$  = 0.49 (petroleum ether/ethyl acetate = 50/1, v/v).  $^1\text{H}$  NMR (400 MHz,  $\text{CDCl}_3$ )  $\delta$  7.26 (dd,  $J$  = 8.2, 6.7 Hz, 4H), 7.19 (d,  $J$  = 7.3 Hz, 2H), 7.13-7.06 (m, 4H), 6.99 (d,  $J$  = 8.6 Hz, 2H), 6.79 (d,  $J$  = 8.6 Hz, 2H), 5.48 (s, 1H), 4.53-4.44 (m, 1H), 1.30 (d,  $J$  = 6.1 Hz, 6H).  $^{13}\text{C}$  NMR (100 MHz,  $\text{CDCl}_3$ )  $\delta$  156.3, 144.3, 135.8, 130.3, 129.4, 128.2, 126.1, 115.5, 69.7, 56.0, 22.1.

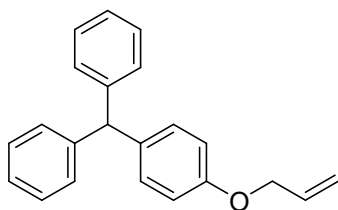

**((4-allyloxy)phenyl)methylene)dibenzene (5ad)**: Prepared in 85% yield (127.5 mg) as a colourless oil.  $R_f$  = 0.41 (petroleum ether/ethyl acetate = 50/1, v/v).  $^1\text{H}$  NMR (400 MHz,  $\text{CDCl}_3$ )  $\delta$  7.26 (dd,  $J$  = 8.1, 6.5 Hz, 4H), 7.19 (dd,  $J$  = 7.6, 1.7 Hz, 2H), 7.12-7.08 (m, 4H), 7.03-6.98 (m, 2H), 6.84-6.79 (m, 2H), 6.03 (ddd,  $J$  = 22.6, 10.6, 5.3 Hz, 1H), 5.49 (s, 1H), 5.38 (dd,  $J$  = 17.3, 1.6 Hz, 1H), 5.25 (dd,  $J$  = 10.5, 1.4 Hz, 1H), 4.48 (dt,  $J$  = 5.4, 1.6 Hz, 2H).  $^{13}\text{C}$  NMR (100 MHz,  $\text{CDCl}_3$ )  $\delta$  157.0, 144.2, 136.2, 133.3, 130.3, 129.3, 128.2, 126.2, 117.6, 114.4, 68.7, 55.9. HRMS-ESI ( $m/z$ ):  $[\text{M}+\text{H}]^+$  Calcd for  $\text{C}_{22}\text{H}_{20}\text{O}$  299.1441; Found 299.1437.

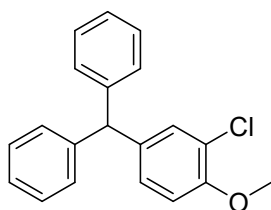

**((3-chloro-4-methoxyphenyl)methylene)dibenzene (5ae)**<sup>12</sup>: Prepared in 52% yield (80.0 mg) as a colourless oil.  $R_f$  = 0.44 (petroleum ether/ethyl acetate = 50/1, v/v).  $^1\text{H}$

NMR (400 MHz, CDCl<sub>3</sub>)  $\delta$  7.31-7.26 (m, 4H), 7.24-7.19 (m, 2H), 7.14-7.07 (m, 5H), 6.95 (dd,  $J$  = 8.5, 2.2 Hz, 1H), 6.83 (dd,  $J$  = 8.5, 1.0 Hz, 1H), 5.47 (s, 1H), 3.86 (d,  $J$  = 1.0 Hz, 3H). <sup>13</sup>C NMR (100 MHz, CDCl<sub>3</sub>)  $\delta$  153.4, 143.5, 137.1, 131.0, 129.3, 128.5, 128.4, 126.4, 122.1, 111.7, 56.1, 55.7.

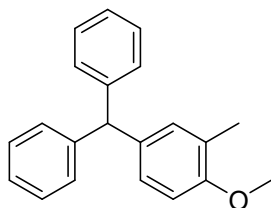

**((4-methoxy-3-methylphenyl)methylene)dibenzene (5af)**<sup>13</sup>: Prepared in 92% yield (132.0 mg) as a colourless oil.  $R_f$  = 0.44 (petroleum ether/ethyl acetate = 50/1, v/v). <sup>1</sup>H NMR (400 MHz, CDCl<sub>3</sub>)  $\delta$  7.47 (t,  $J$  = 7.4 Hz, 4H), 7.37 (dd,  $J$  = 23.6, 7.3 Hz, 6H), 7.15 (s, 1H), 7.09 (d,  $J$  = 8.3 Hz, 1H), 6.92 (d,  $J$  = 8.3 Hz, 1H), 5.69 (s, 1H), 3.96 (s, 3H), 2.39 (s, 3H). <sup>13</sup>C NMR (100 MHz, CDCl<sub>3</sub>)  $\delta$  156.1, 144.3, 135.5, 131.7, 129.3, 128.2, 127.5, 126.3, 126.1, 109.5, 56.0, 55.1, 16.3.

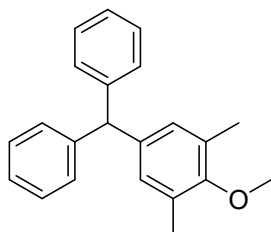

**((4-methoxy-3,5-dimethylphenyl)methylene)dibenzene (5ag)**<sup>14</sup>: Prepared in 86% yield (130.5 mg) as a colourless oil.  $R_f$  = 0.44 (petroleum ether/ethyl acetate = 50/1, v/v). <sup>1</sup>H NMR (400 MHz, CDCl<sub>3</sub>)  $\delta$  7.24 (dd,  $J$  = 8.2, 6.7 Hz, 4H), 7.17 (d,  $J$  = 7.4 Hz, 2H), 7.13-7.08 (m, 4H), 6.74 (s, 2H), 5.42 (s, 1H), 3.66 (s, 3H), 2.19 (s, 6H). <sup>13</sup>C NMR (100 MHz, CDCl<sub>3</sub>)  $\delta$  155.3, 144.1, 138.9, 130.4, 129.7, 129.3, 128.2, 126.1, 59.5, 56.2, 16.1.

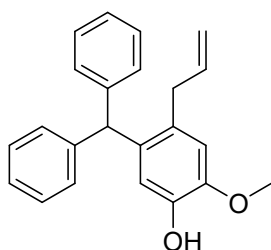

**4-allyl-5-benzhydryl-2-methoxyphenol (5ah):** Prepared in 90% yield (148.2 mg) as a colourless oil.  $R_f = 0.32$  (petroleum ether/ethyl acetate = 10/1, v/v).  $^1\text{H}$  NMR (400 MHz,  $\text{CDCl}_3$ )  $\delta$  7.23 (dd,  $J = 8.2, 6.6$  Hz, 4H), 7.17 (d,  $J = 7.3$  Hz, 2H), 7.08-6.98 (m, 4H), 6.66 (s, 1H), 6.47 (s, 1H), 5.90 (ddt,  $J = 16.4, 10.1, 6.1$  Hz, 1H), 5.66 (s, 1H), 5.43 (s, 1H), 5.08-4.97 (m, 2H), 3.81 (s, 3H), 3.22 (d,  $J = 6.1$  Hz, 2H).  $^{13}\text{C}$  NMR (100 MHz,  $\text{CDCl}_3$ )  $\delta$  144.8, 143.7, 143.5, 137.5, 135.1, 129.4, 129.4, 128.2, 126.1, 116.4, 115.5, 112.4, 55.8, 52.0, 36.9. HRMS-ESI ( $m/z$ ):  $[\text{M}+\text{H}]^+$  Calcd for  $\text{C}_{23}\text{H}_{22}\text{O}_2$  329.1547; Found 329.1548.

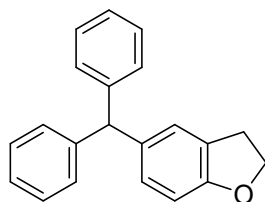

**5-benzhydryl-2,3-dihydrobenzofuran (5ai):** Prepared in 82% yield (181.5 mg) as a colourless oil.  $R_f = 0.44$  (petroleum ether/ethyl acetate = 10/1, v/v).  $^1\text{H}$  NMR (400 MHz,  $\text{CDCl}_3$ )  $\delta$  7.24 (dd,  $J = 8.1, 6.7$  Hz, 4H), 7.19-7.14 (m, 2H), 7.10 (dd,  $J = 7.1, 1.8$  Hz, 4H), 6.91 (d,  $J = 1.8$  Hz, 1H), 6.82 (dd,  $J = 8.3, 2.0$  Hz, 1H), 6.67 (d,  $J = 8.2$  Hz, 1H), 5.46 (s, 1H), 4.47 (t,  $J = 8.7$  Hz, 2H), 3.06 (t,  $J = 8.7$  Hz, 2H).  $^{13}\text{C}$  NMR (100 MHz,  $\text{CDCl}_3$ )  $\delta$  158.5, 144.3, 136.0, 129.3, 129.0, 128.2, 126.9, 126.1, 125.8, 108.8, 71.1, 56.2, 29.7. HRMS-ESI ( $m/z$ ):  $[\text{M}+\text{H}]^+$  Calcd for  $\text{C}_{21}\text{H}_{18}\text{O}$  286.1358; Found 286.1356.

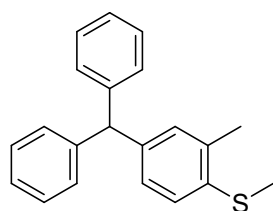

**(4-benzhydryl-2-methylphenyl)(methyl)sulfane (5aj)<sup>15</sup>:** Prepared in 90% yield (130.2 mg) as a colourless oil.  $R_f = 0.44$  (petroleum ether/ethyl acetate = 10/1, v/v).  $^1\text{H}$  NMR (400 MHz,  $\text{CDCl}_3$ )  $\delta$  7.29-7.25 (m, 4H), 7.19 (dd,  $J = 15.8, 7.9$  Hz, 4H), 7.11-7.08 (m, 4H), 7.03 (d,  $J = 8.3$  Hz, 2H), 5.50 (s, 1H), 2.43 (s, 3H).  $^{13}\text{C}$  NMR (100 MHz,  $\text{CDCl}_3$ )  $\delta$  143.7, 140.9, 136.1, 129.9, 129.3, 128.3, 126.6, 126.3, 56.2, 15.9.

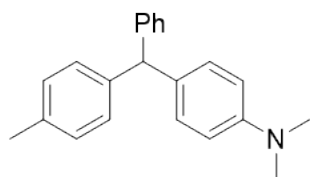

***N,N*-dimethyl-4-(phenyl(*p*-tolyl)methyl)aniline (5bk)<sup>16</sup>**: Prepared in 45% yield (67.7 mg) as a colourless oil.  $R_f = 0.47$  (petroleum ether/ethyl acetate = 50/1, v/v).  $^1\text{H}$  NMR (400 MHz,  $\text{CDCl}_3$ )  $\delta$  7.33 (t,  $J = 7.2$  Hz, 2H), 7.25 (d,  $J = 7.2$  Hz, 1H), 7.17 (dd,  $J = 17.2, 7.5$  Hz, 4H), 7.10-7.01 (m, 4H), 6.75 (d,  $J = 8.8$  Hz, 2H), 5.50 (s, 1H), 2.97 (s, 6H), 2.38 (s, 3H).  $^{13}\text{C}$  NMR (100 MHz,  $\text{CDCl}_3$ )  $\delta$  148.8, 144.8, 141.6, 135.5, 130.0, 129.3, 129.2, 128.9, 128.2, 128.1, 125.9, 112.6, 55.5, 40.8, 21.0.

## G. References

1. Bai, Y.; Lin, Z.; Ye, Z.; Dong, D.; Wang, J.; Chen, L.; Xie, F.; Li, Y.; Dixneuf, P. H.; Zhang, M. Ruthenium-catalyzed regioselective hydrohalogenation of alkynes mediated by trimethylsilyl triflate. *Organic Letters* **2022**, *24* (43), 7988-7992.
2. Burmester, A.; HB, S., Alkylierung von 2-t-Butylphenol mit Diarylcarbinolen. **1981**.
3. Luo, R.; Liang, Y.; Wang, S.; Liao, J.; Ouyang, L. Iridium-catalyzed selective para-C-alkylation of anilines/phenols with aryl alkynes. *Journal of Catalysis* **2023**, *428*, 115184.
4. Mejri, E.; Higashida, K.; Kondo, Y.; Nawachi, A.; Morimoto, H.; Ohshima, T.; Sawamura, M.; Shimizu, Y. Visible-Light-Induced Aminochlorination of Alkenes. *Organic Letters* **2023**, *25* (24), 4581-4585.
5. Nath, N. K.; Nilapwar, S.; Nangia, A. Chiral and racemic tetramorphs of 2, 6-di-t-butyliditolylfuchstone. *Crystal Growth & Design* **2012**, *12* (3), 1613-1625.
6. Singh, S.; Mahato, R.; Sharma, P.; Yadav, N.; Vodnala, N.; Kumar Hazra, C. Development of Transition-Metal-Free Lewis Acid-Initiated Double Arylation of Aldehyde: A Facile Approach Towards the Total Synthesis of Anti-Breast-Cancer Agent. *Chemistry–A European Journal* **2022**, *28* (14), e202104545.
7. Xiong, B.; Si, L.; Zhu, L.; Wu, R.; Liu, Y.; Xu, W.; Zhang, F.; Tang, K. W.; Wong, W. Y. Room-Temperature ZnBr<sub>2</sub>-Catalyzed Regioselective, 6-Hydroarylation of Electron-Rich Arenes to para-Quinone Methides: Synthesis of Unsymmetrical Triarylmethanes. *Chemistry–An Asian Journal* **2023**, *18* (3), e202201156.
8. Yu, J.; Chen, S.; Liu, K.; Yuan, L.; Mei, L.; Chai, Z.; Shi, W. Uranyl-catalyzed hydrosilylation of para-quinone methides: access to diarylmethane derivatives. *Organic & Biomolecular Chemistry* **2021**, *19* (7), 1575-1579.
9. Zhang, Y.; Hou, J.; Yang, H.; Wang, S.; Yuan, K. Electrochemically enhanced deoxygenative cross-coupling of aryl ketones with heteroarenes through in situ generated benzyl carbocations. *Organic & Biomolecular Chemistry* **2023**, *21* (1), 80-84.

10. Li, H.; Li, W.; Liu, W.;. An Efficient and General Iron-Catalyzed C-C Bond Activation with 1, 3-Dicarbonyl Units as a Leaving Groups. *Angewandte Chemie International Edition*, **2011**, *13*(50): 2975-2978.
11. Collection of Czechoslovak Chemical Communications, **1976**, *41*, 2919 – 2927
12. Li, Z.; Li ,B.; J, Lu X Y, et al. Cross Dehydrogenative Arylation (CDA) of a Benzylic C-H Bond with Arenes by Iron Catalysis. *Angewandte Chemie International Edition*, **2009**, *48*(21): 3817-3820.
13. Courant, T.; Lombard, M.; Boyarskaya, D. V. Tritylium assisted iodine catalysis for the synthesis of unsymmetrical triarylmethanes. *Organic & Biomolecular Chemistry*, **2020**, *18*(33): 6502-6508.
14. Lielpetere, A.; Jirgensons, A. Friedel–Crafts Alkylation with Carbenium Ions Generated by Electrochemical Oxidation of Stannylmethyl Ethers. *European Journal of Organic Chemistry*, **2020**, *2020*(29): 4510-4516.
15. Liu, C. R.; Li, M. B.; Yang, C. F. Selective Benzylic and Allylic Alkylation of Protic Nucleophiles with Sulfonamides through Double Lewis Acid Catalyzed Cleavage of sp<sup>3</sup> Carbon–Nitrogen Bonds. *Chemistry–A European Journal*, **2009**, *15*(3): 793-797.
16. Ouyang, L.; Liang, Y.; Wang, S.; Liao, J.; Luo, R. Access of arylmethanes via iridium-catalyzed deoxygenative cross-coupling of aryl ketones with anilines/phenols. *Journal of Catalysis*, **2024**, *433*, 115492.



## H. NMR Spectra

### <sup>1</sup>H NMR (400 MHz, CDCl<sub>3</sub>) spectrum of 3aa

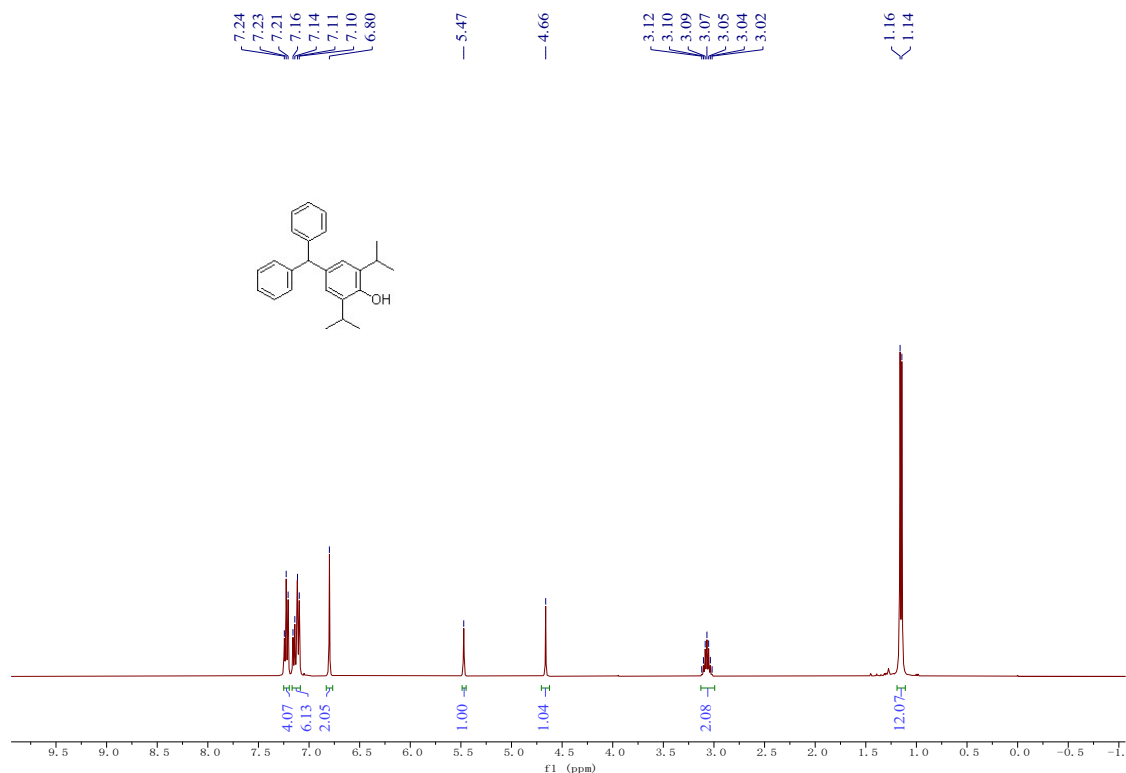

### <sup>13</sup>C NMR (100 MHz, CDCl<sub>3</sub>) spectrum of 3aa

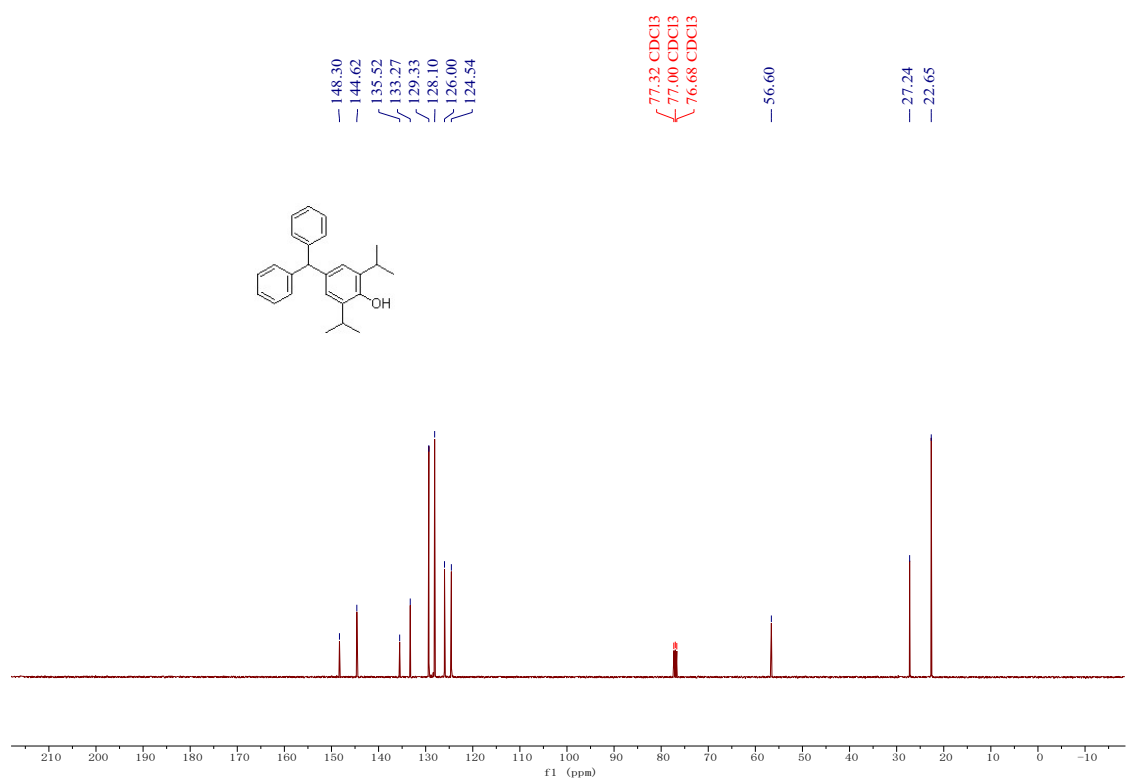

### <sup>1</sup>H NMR (400 MHz, CDCl<sub>3</sub>) spectrum of 3ab

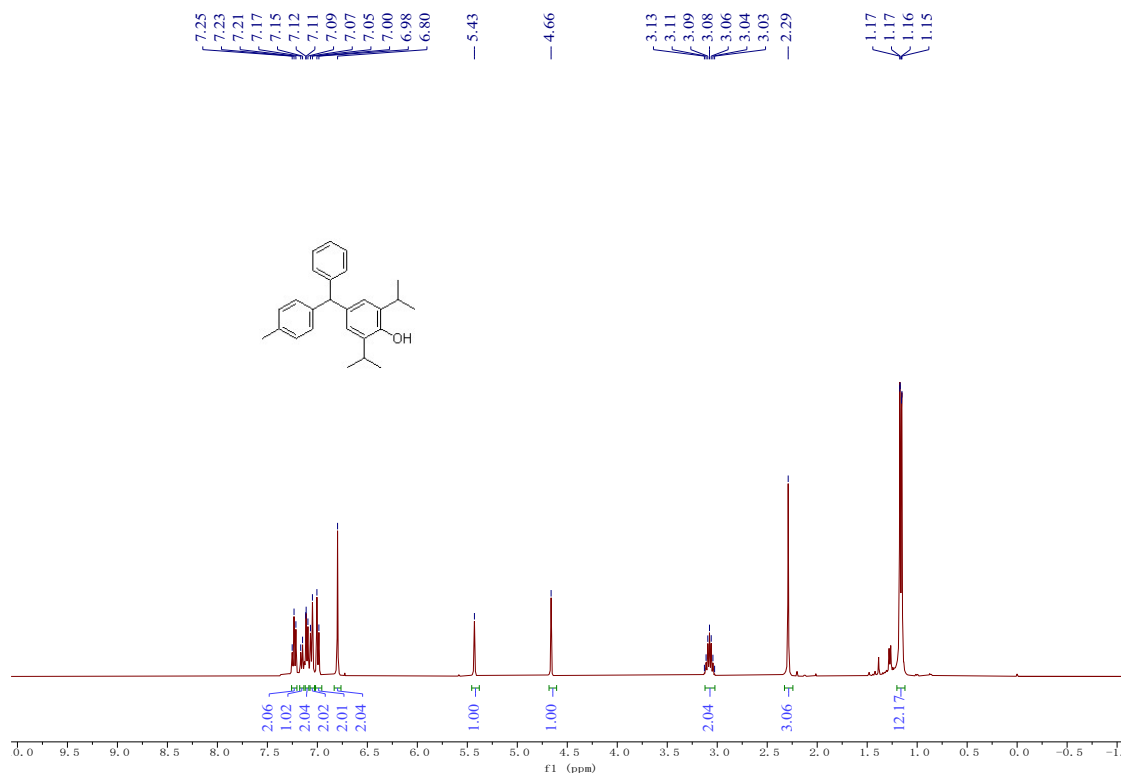

### <sup>13</sup>C NMR (100 MHz, CDCl<sub>3</sub>) spectrum of 3ab

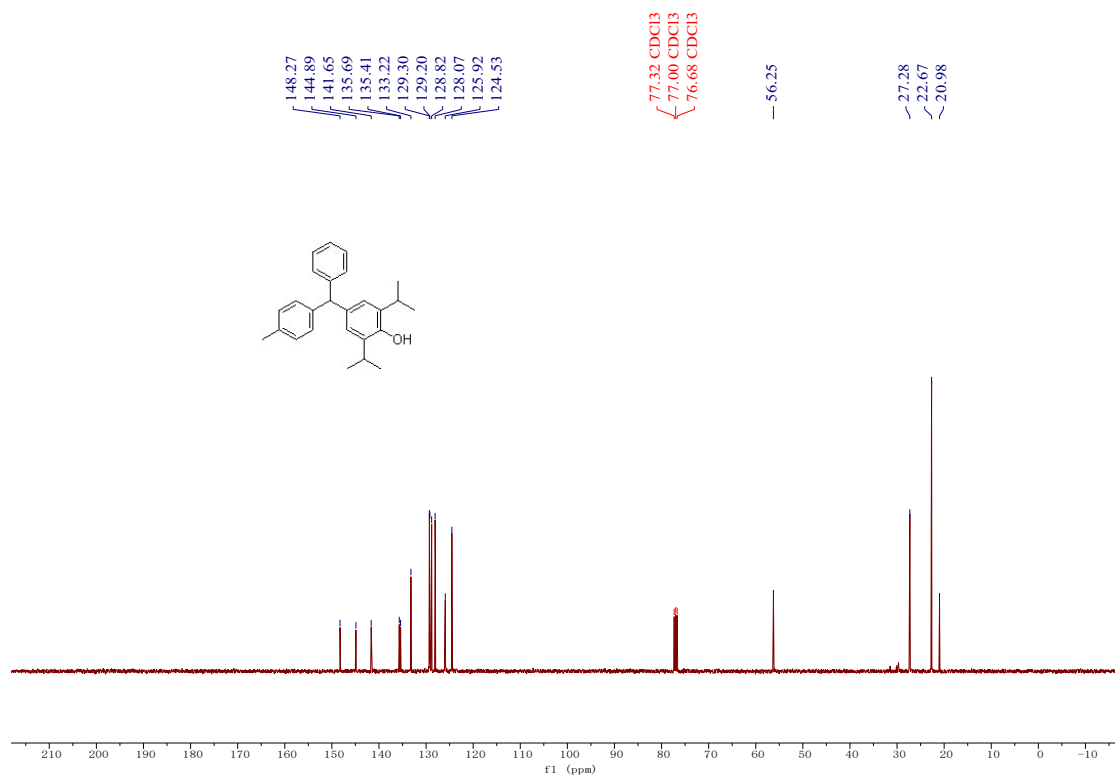

### <sup>1</sup>H NMR (400 MHz, CDCl<sub>3</sub>) spectrum of 3ac

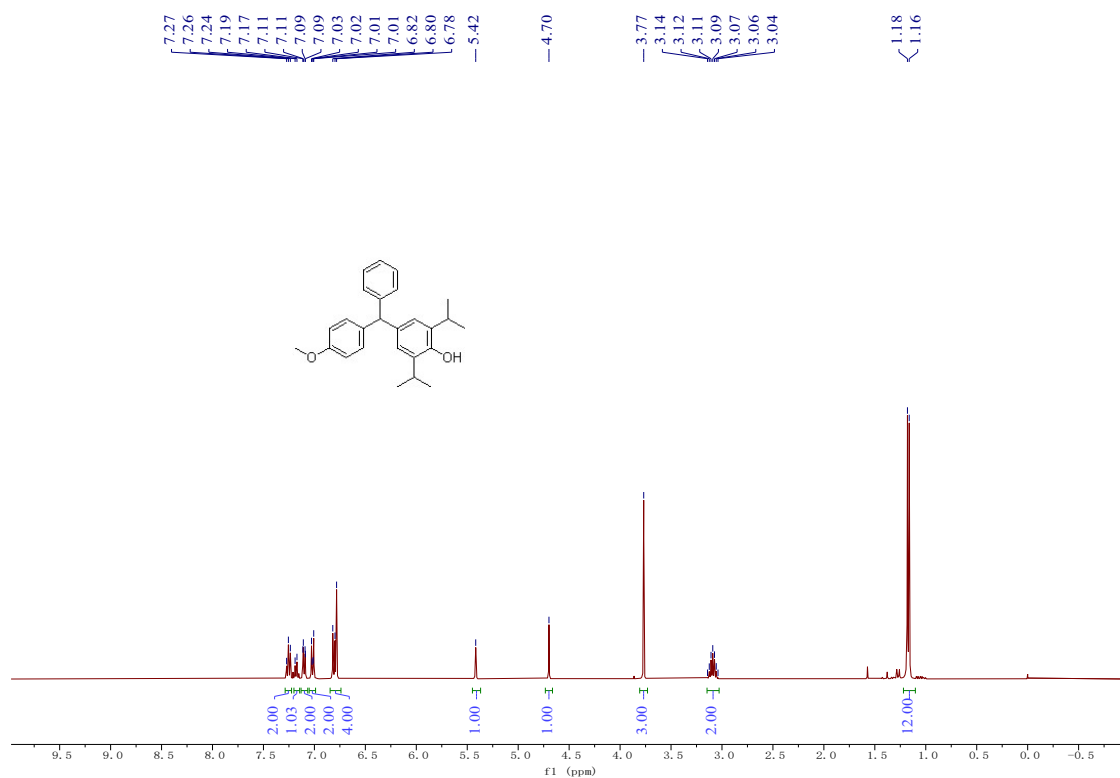

### <sup>13</sup>C NMR (100 MHz, CDCl<sub>3</sub>) spectrum of 3ac

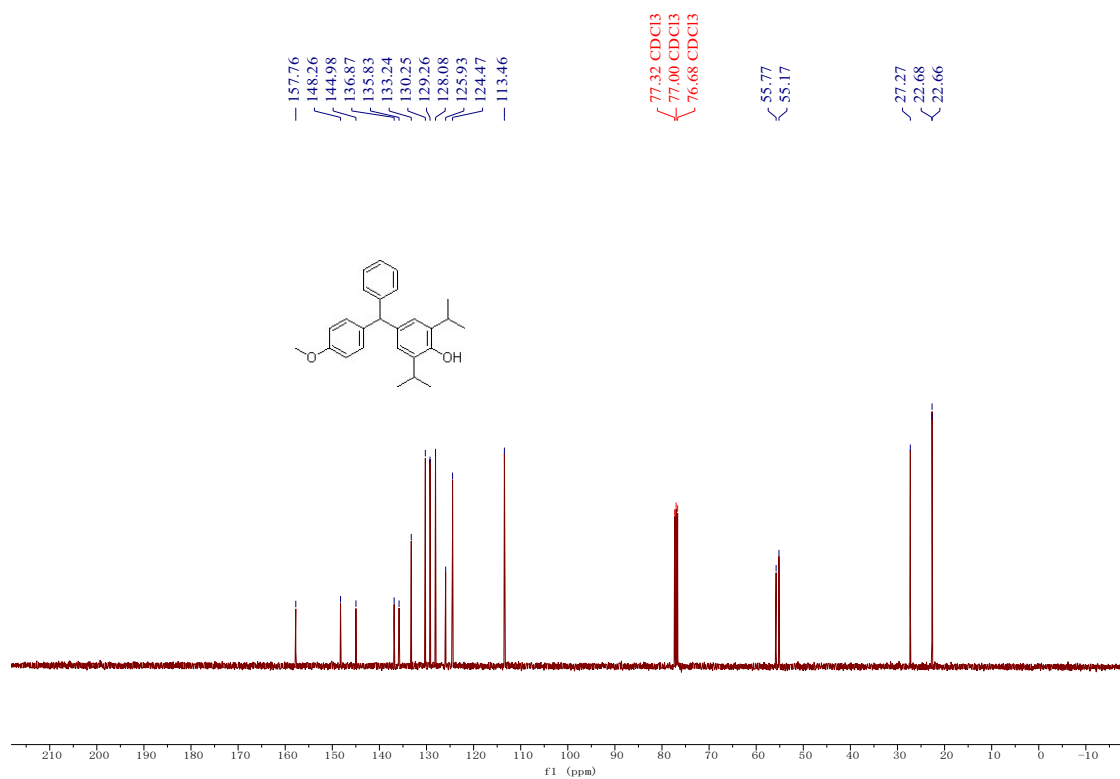

### <sup>1</sup>H NMR (400 MHz, CDCl<sub>3</sub>) spectrum of 3ad

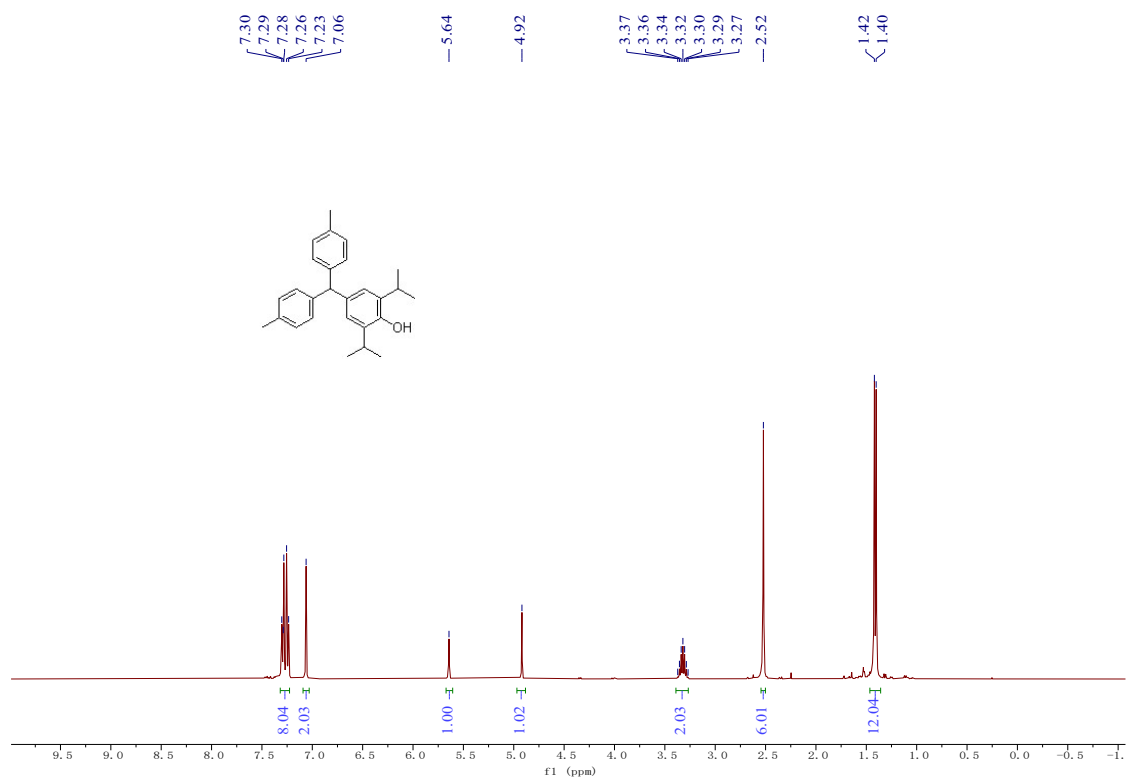

### <sup>13</sup>C NMR (100 MHz, CDCl<sub>3</sub>) spectrum of 3ad

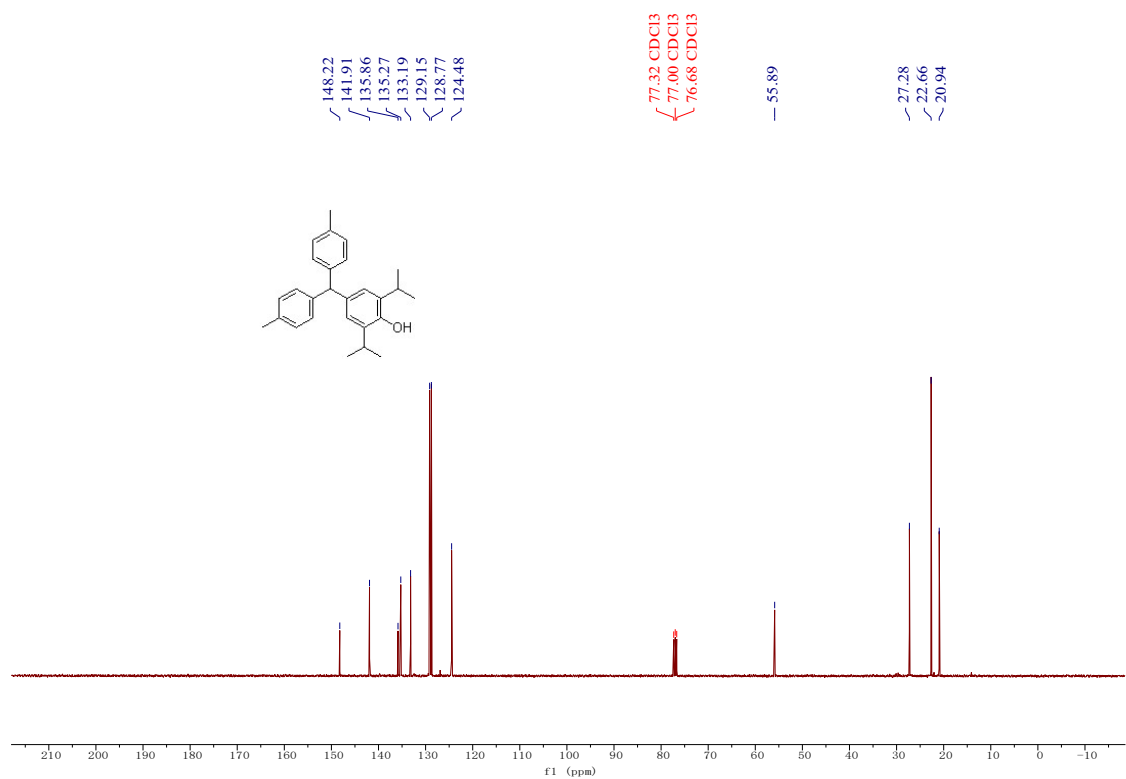

### <sup>1</sup>H NMR (400 MHz, CDCl<sub>3</sub>) spectrum of 3ae

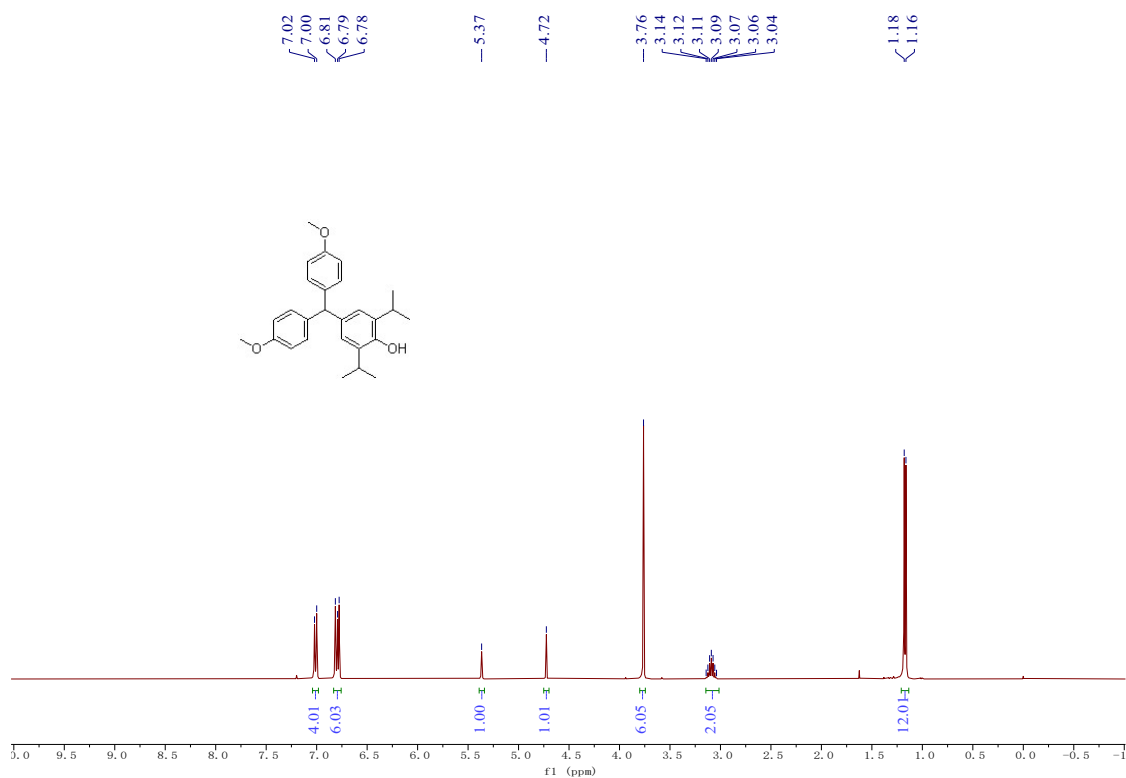

### <sup>13</sup>C NMR (100 MHz, CDCl<sub>3</sub>) spectrum of 3ae

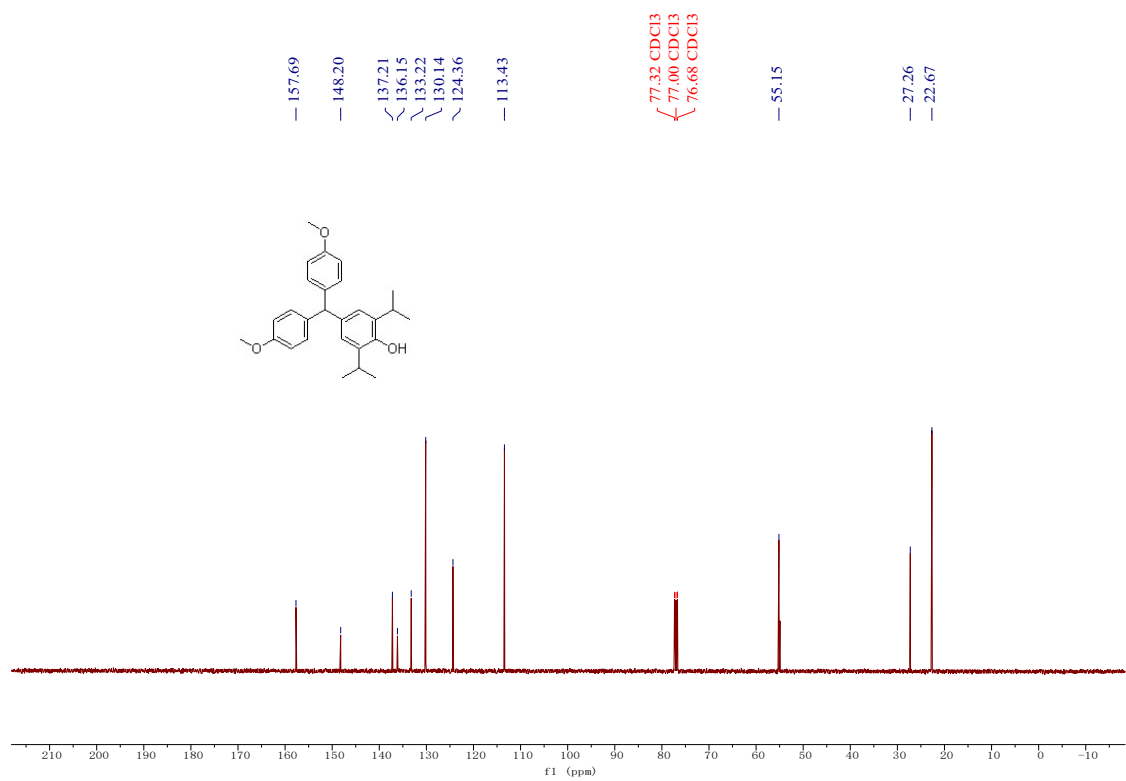

### <sup>1</sup>H NMR (400 MHz, CDCl<sub>3</sub>) spectrum of 3af

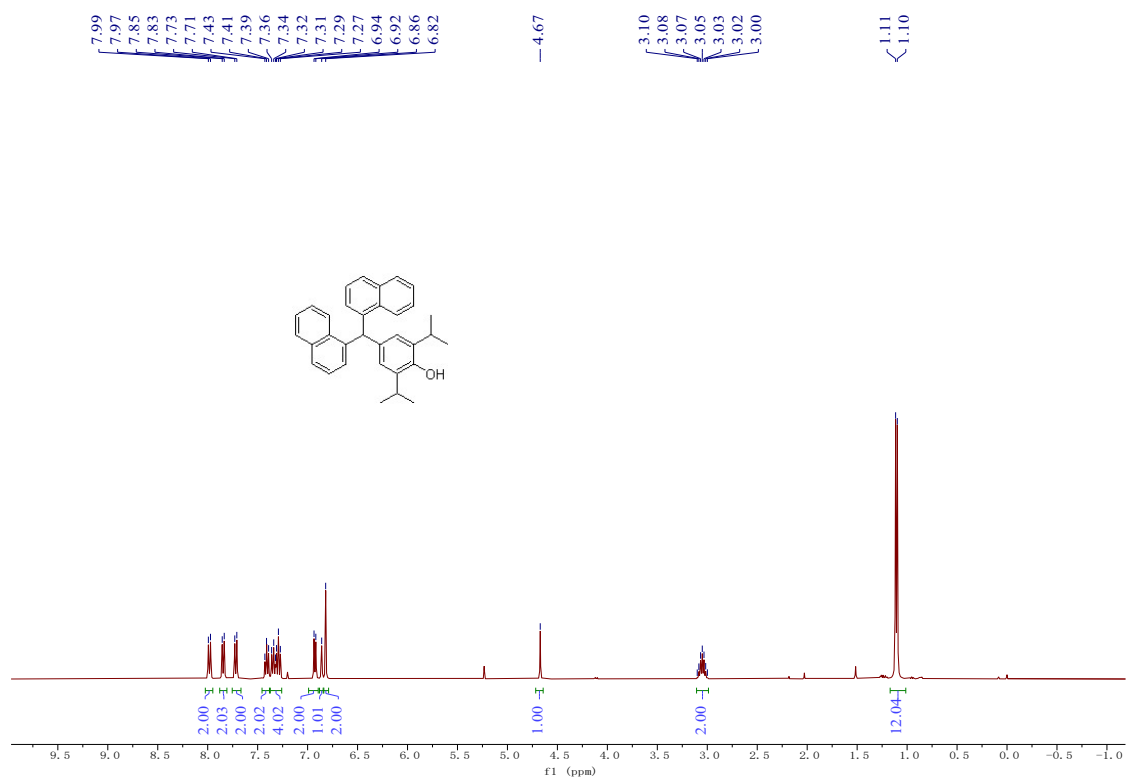

### <sup>13</sup>C NMR (100 MHz, CDCl<sub>3</sub>) spectrum of 3af

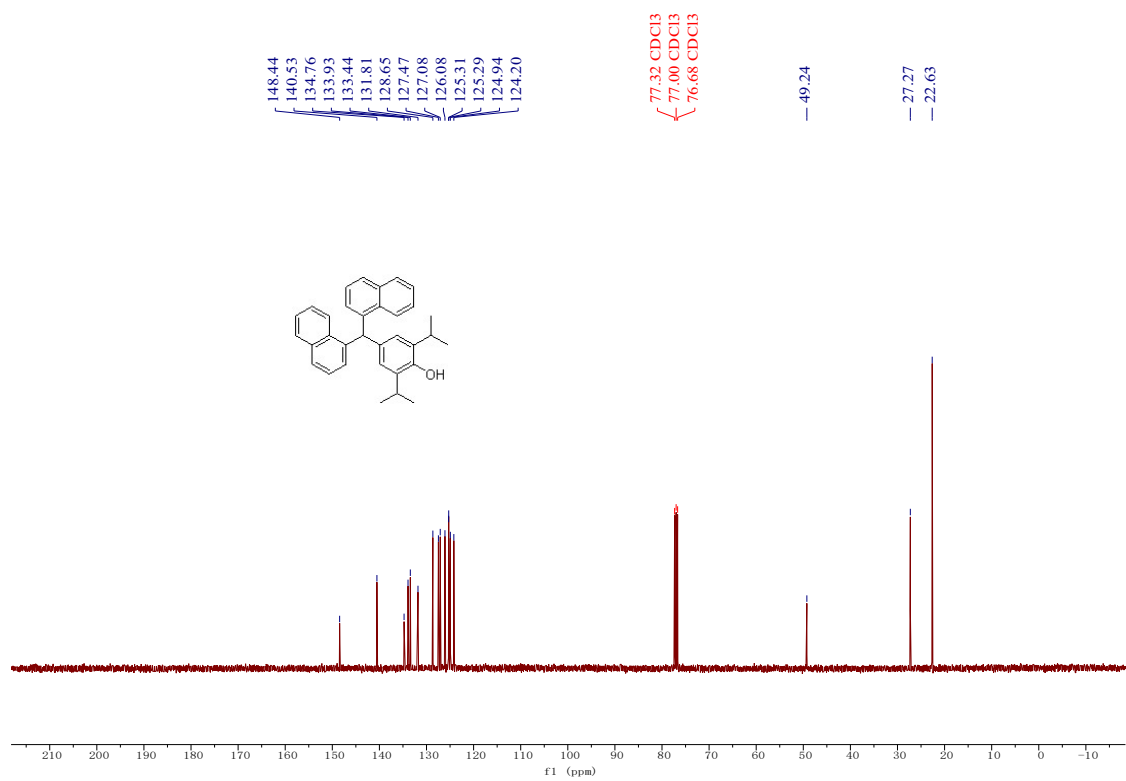

### <sup>1</sup>H NMR (400 MHz, CDCl<sub>3</sub>) spectrum of 3ag

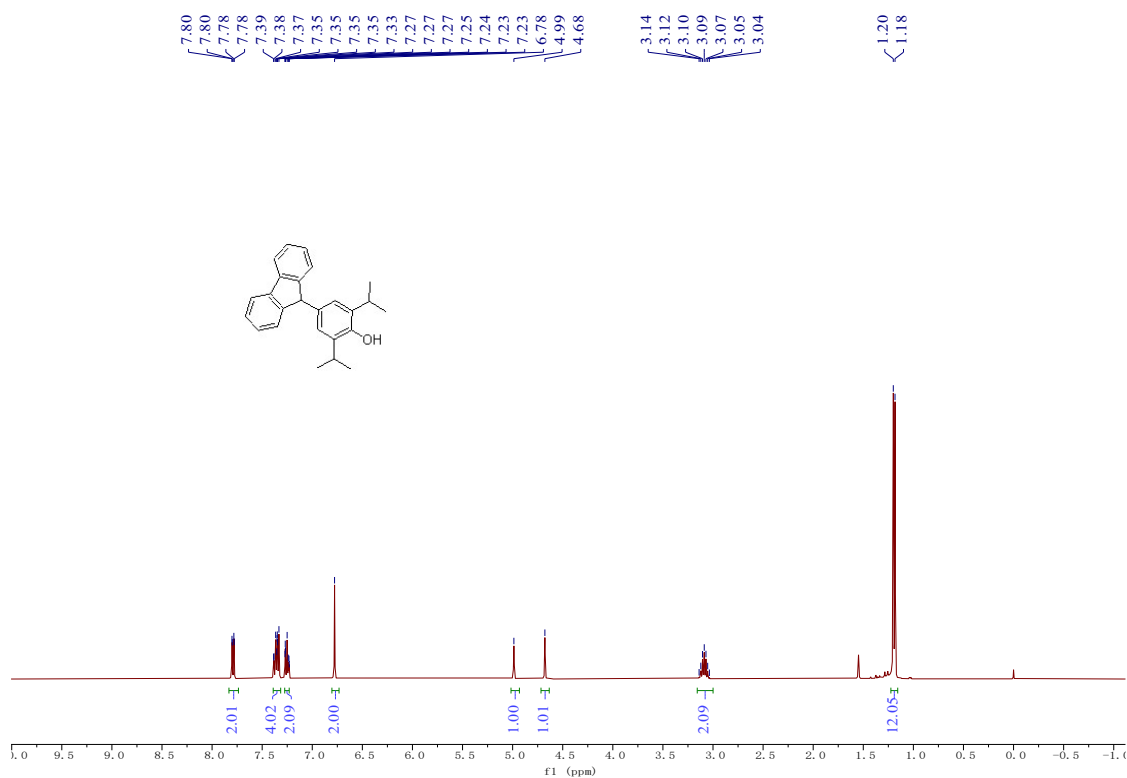

### <sup>13</sup>C NMR (100 MHz, CDCl<sub>3</sub>) spectrum of 3ag

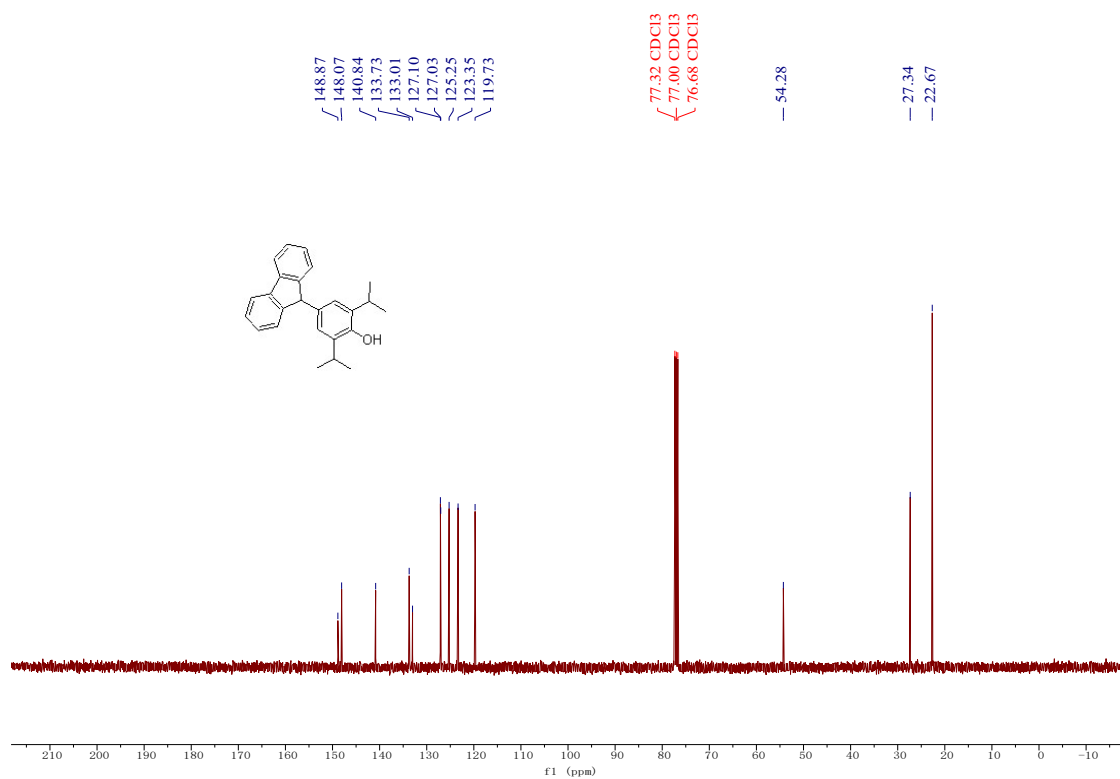

### <sup>1</sup>H NMR (400 MHz, CDCl<sub>3</sub>) spectrum of 3ah

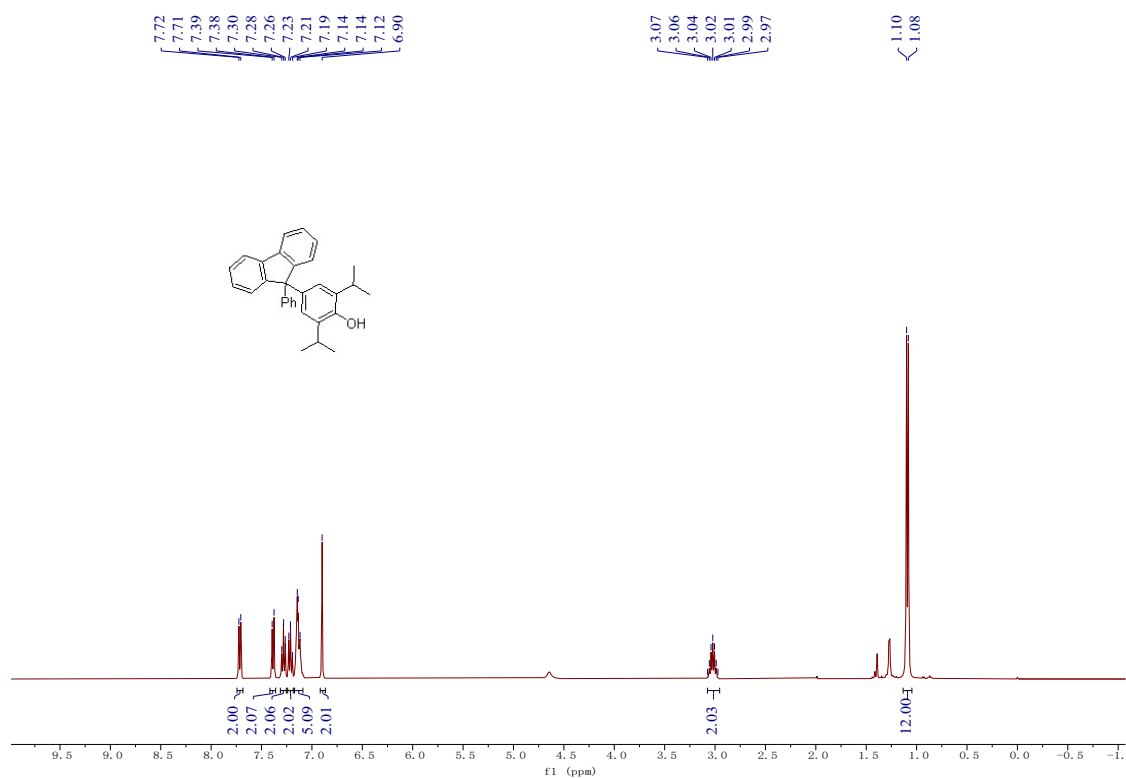

### <sup>13</sup>C NMR (100 MHz, CDCl<sub>3</sub>) spectrum of 3ah

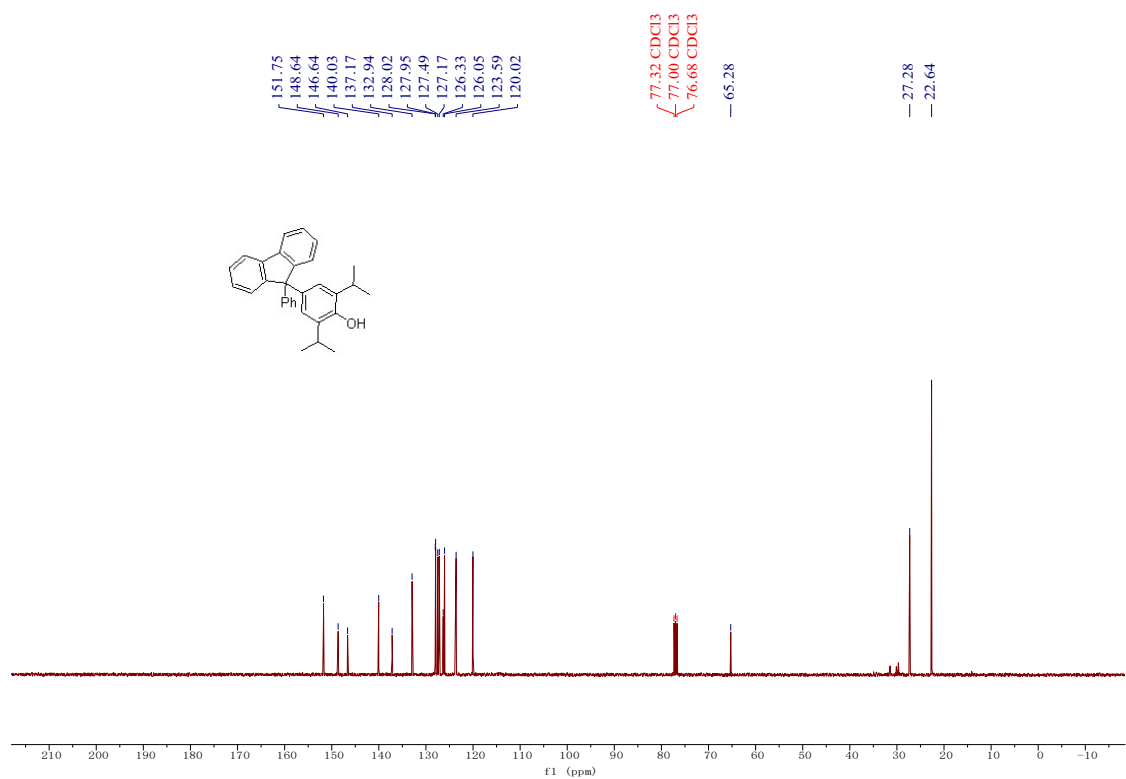



### <sup>1</sup>H NMR (400 MHz, CDCl<sub>3</sub>) spectrum of 3ai

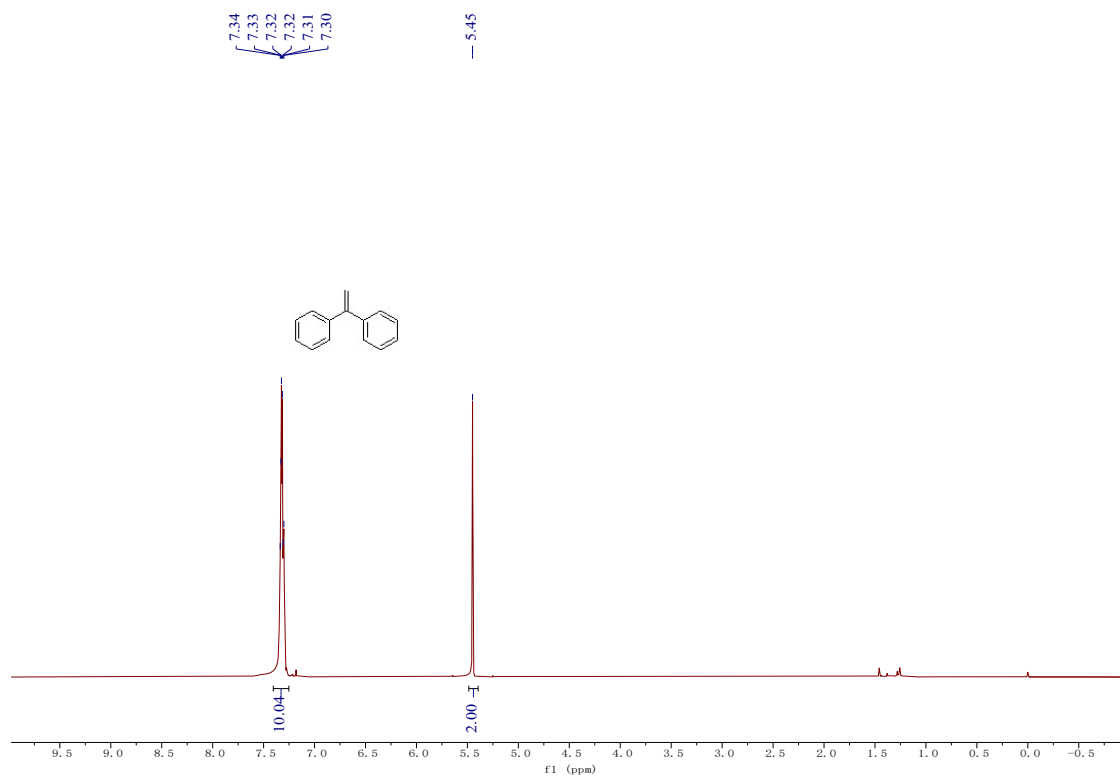

### <sup>13</sup>C NMR (100 MHz, CDCl<sub>3</sub>) spectrum of 3ai

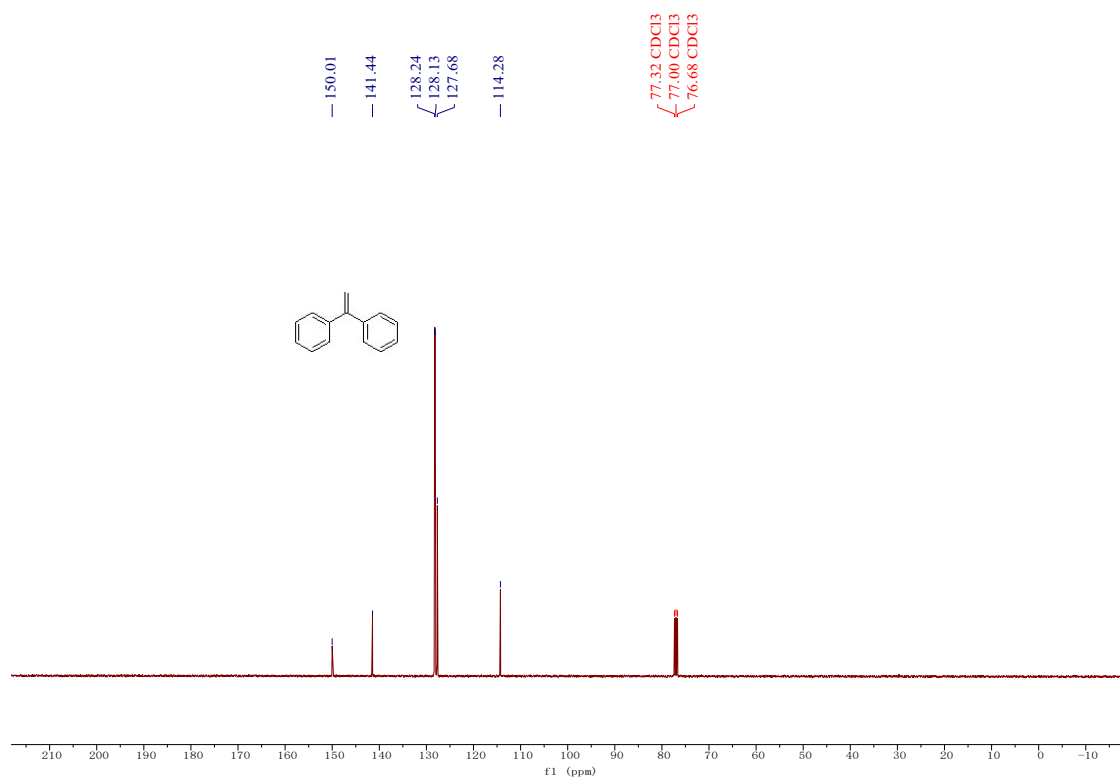

### <sup>1</sup>H NMR (400 MHz, CDCl<sub>3</sub>) spectrum of 3aj

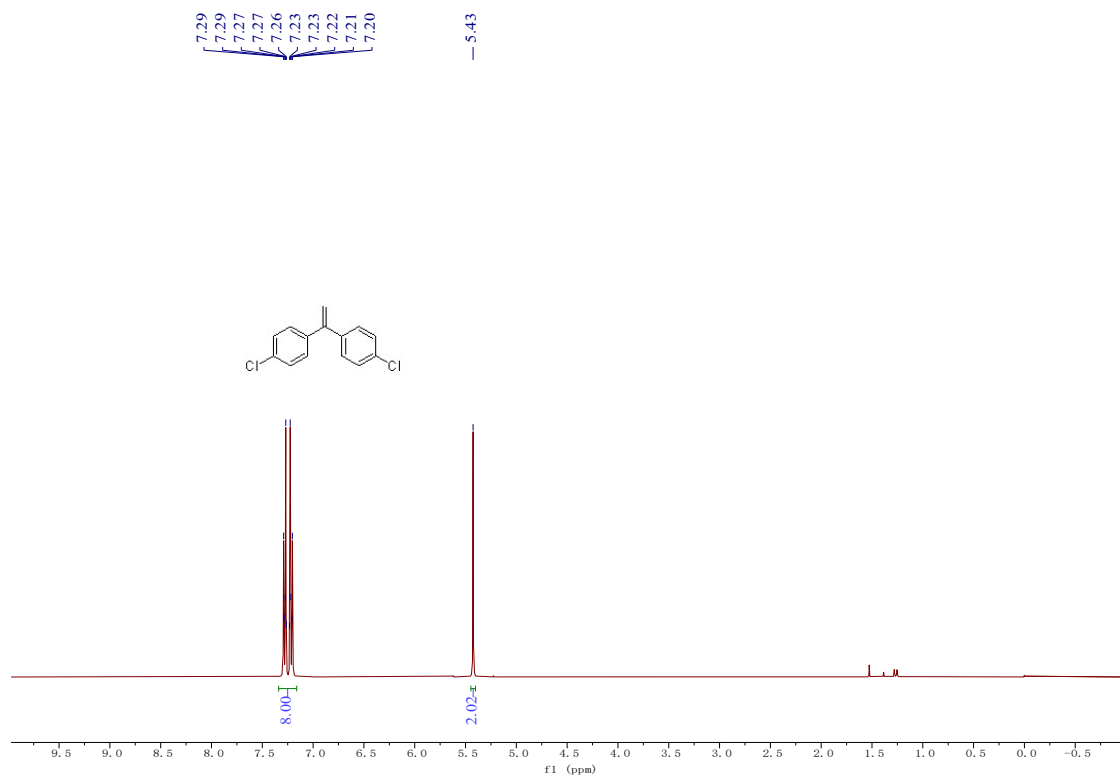

### <sup>13</sup>C NMR (100 MHz, CDCl<sub>3</sub>) spectrum of 3aj

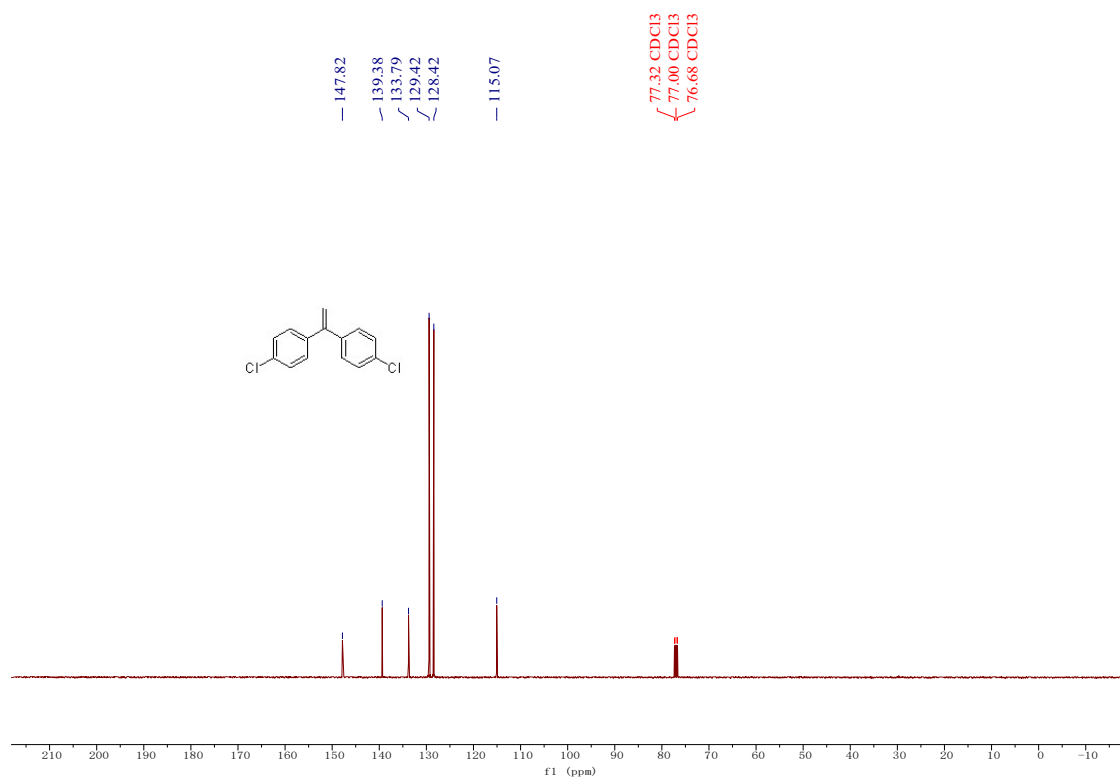

### <sup>1</sup>H NMR (400 MHz, CDCl<sub>3</sub>) spectrum of 3ak

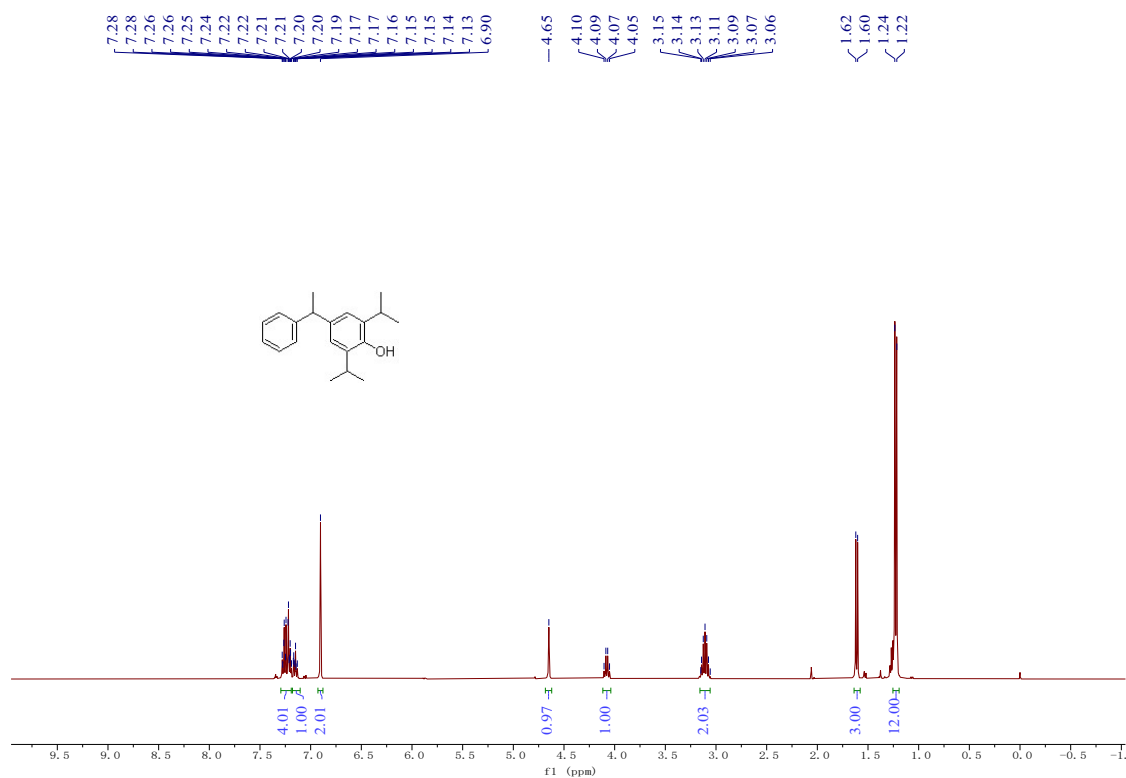

### <sup>13</sup>C NMR (100 MHz, CDCl<sub>3</sub>) spectrum of 3ak

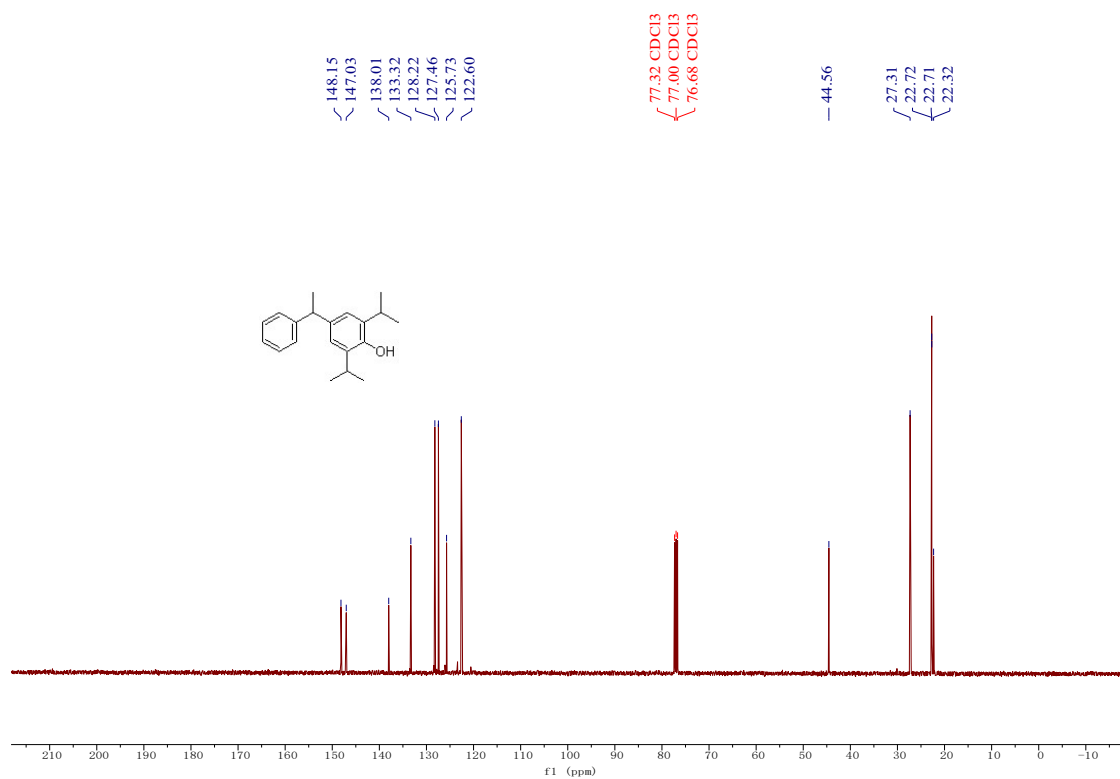

### <sup>1</sup>H NMR (400 MHz, CDCl<sub>3</sub>) spectrum of 3al

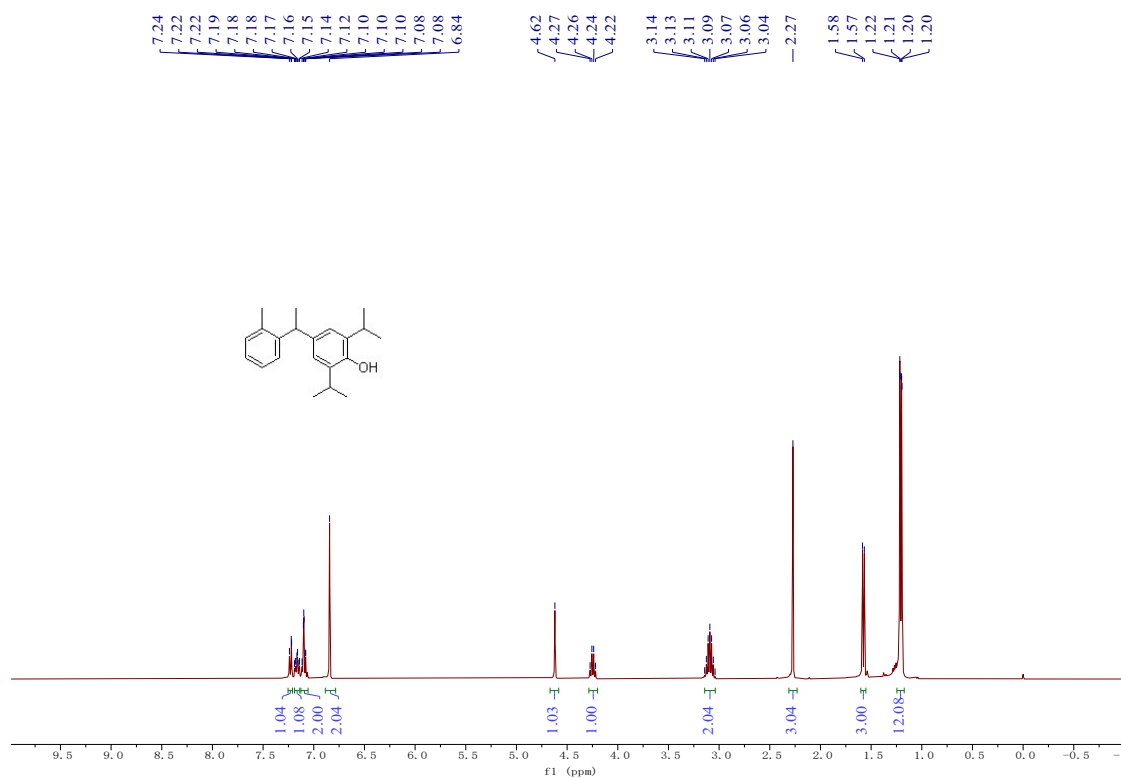

### <sup>13</sup>C NMR (100 MHz, CDCl<sub>3</sub>) spectrum of 3al

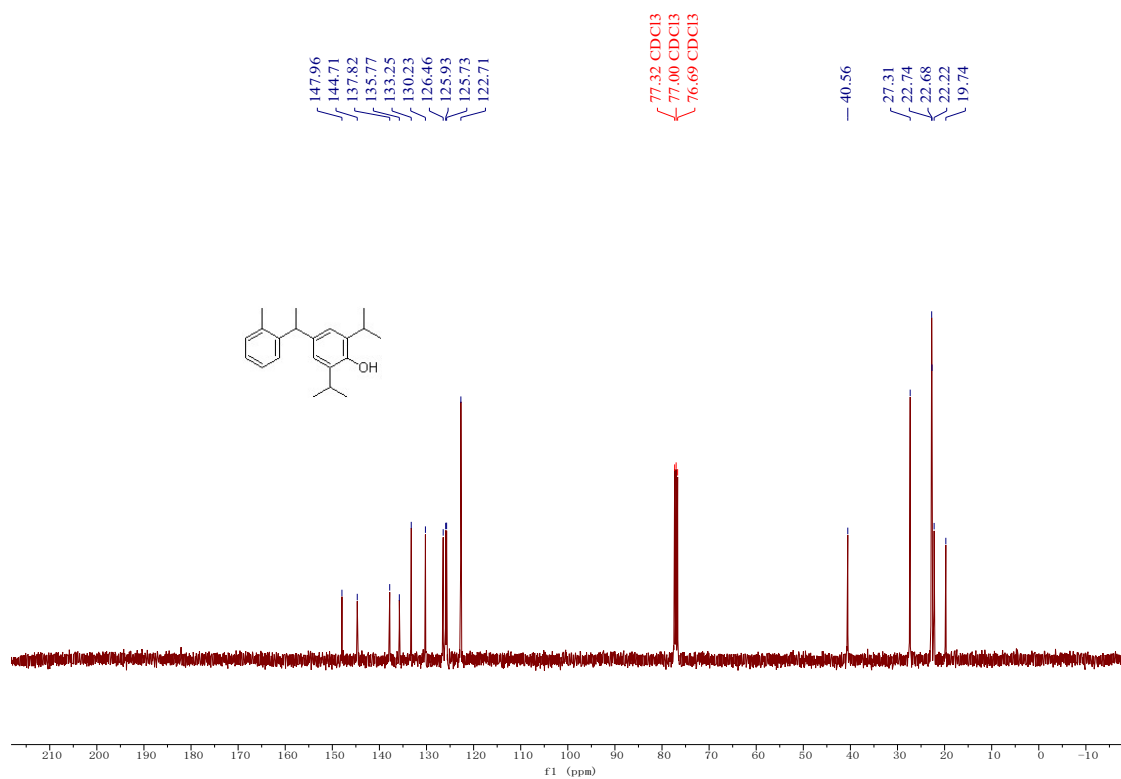

### <sup>1</sup>H NMR (400 MHz, CDCl<sub>3</sub>) spectrum of 3am

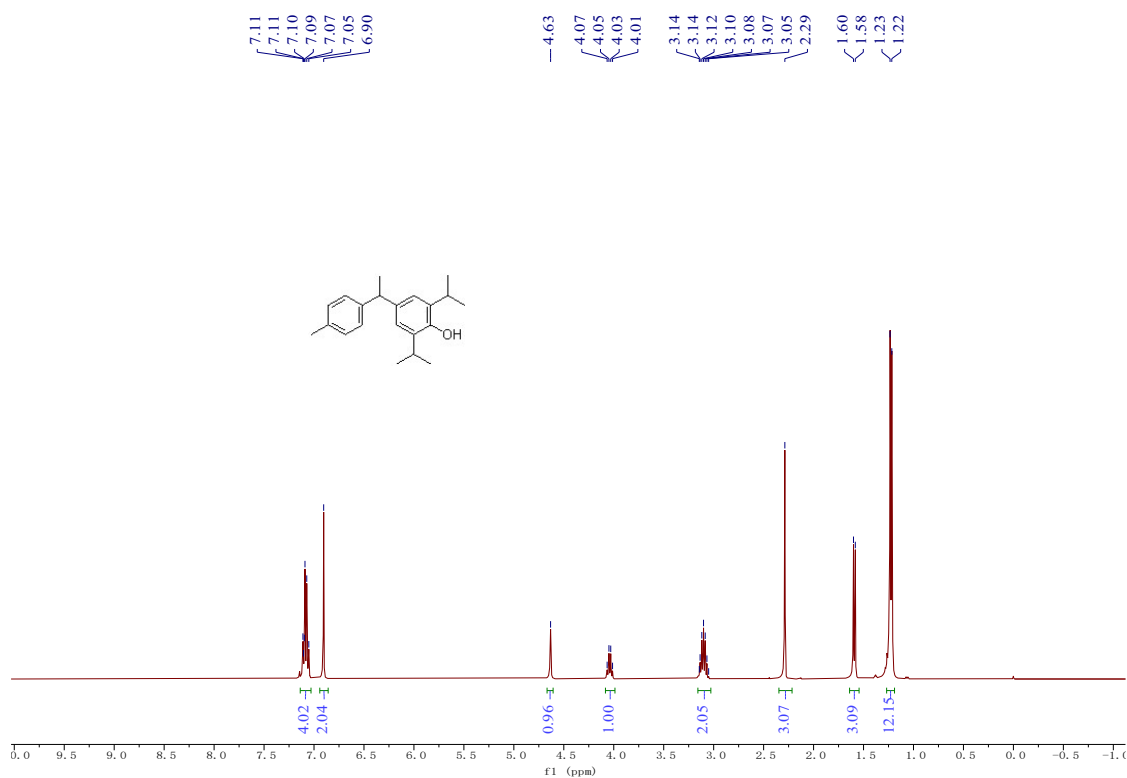

### <sup>13</sup>C NMR (100 MHz, CDCl<sub>3</sub>) spectrum of 3am

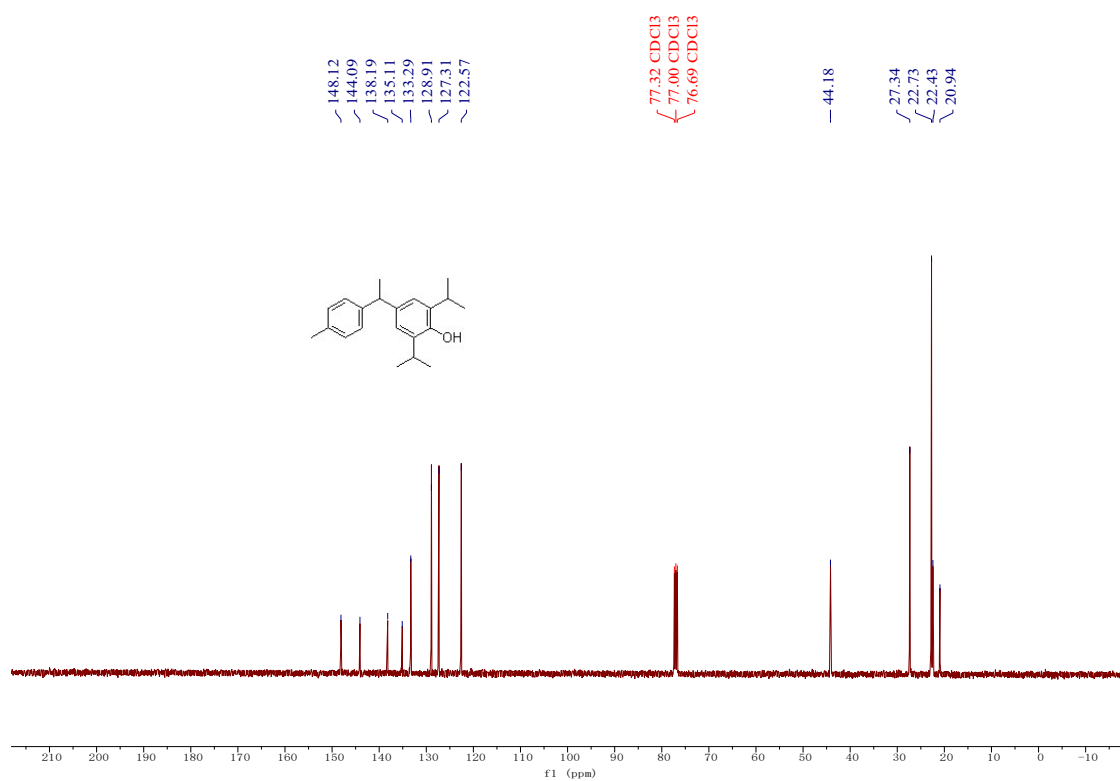

### <sup>1</sup>H NMR (400 MHz, CDCl<sub>3</sub>) spectrum of 3an

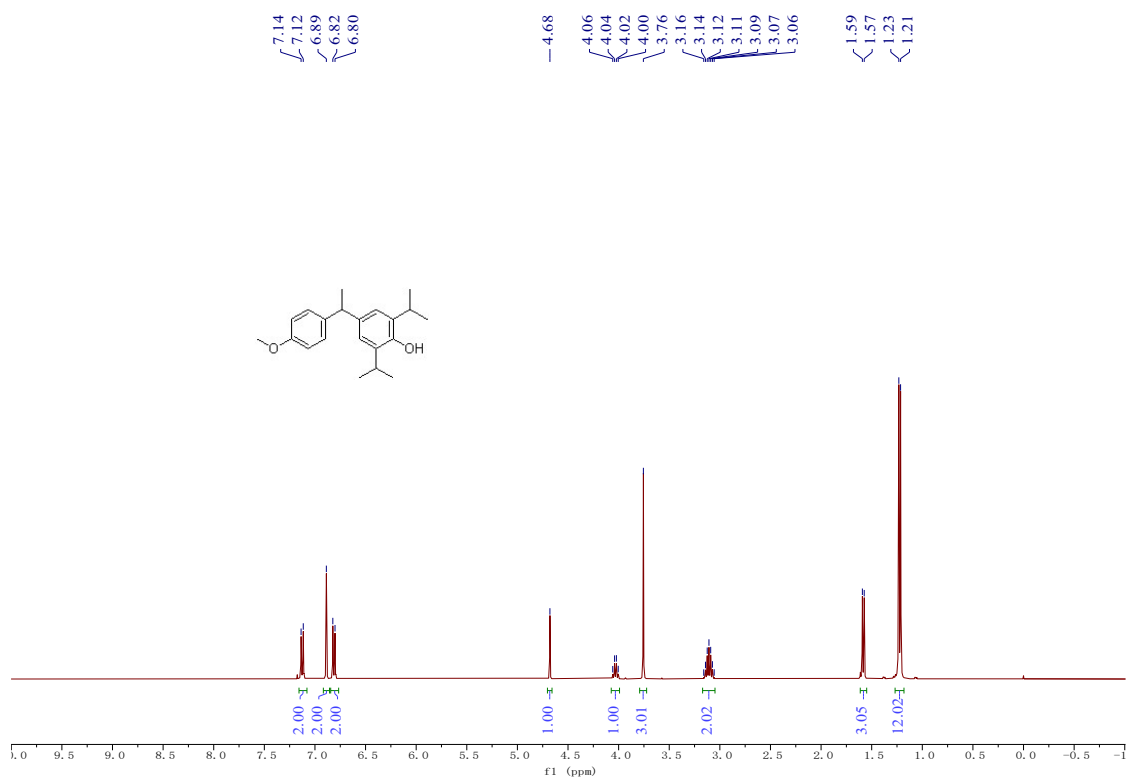

### <sup>13</sup>C NMR (100 MHz, CDCl<sub>3</sub>) spectrum of 3an

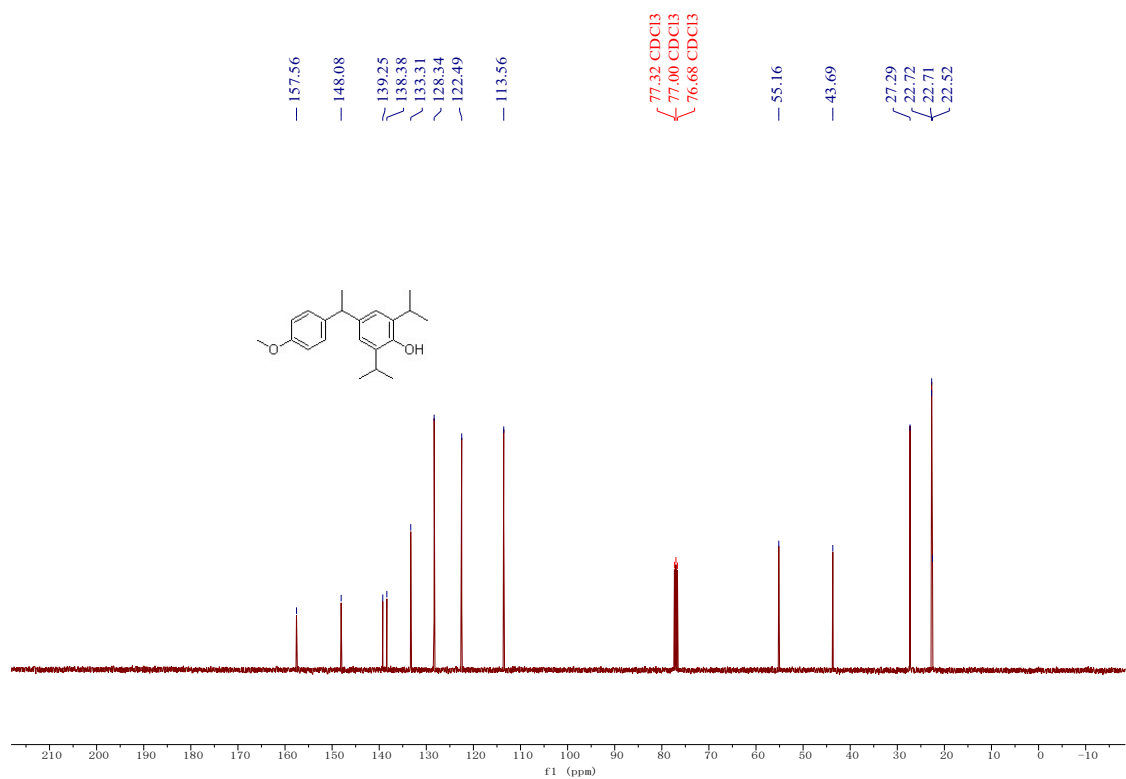

### <sup>1</sup>H NMR (400 MHz, CDCl<sub>3</sub>) spectrum of 3ao

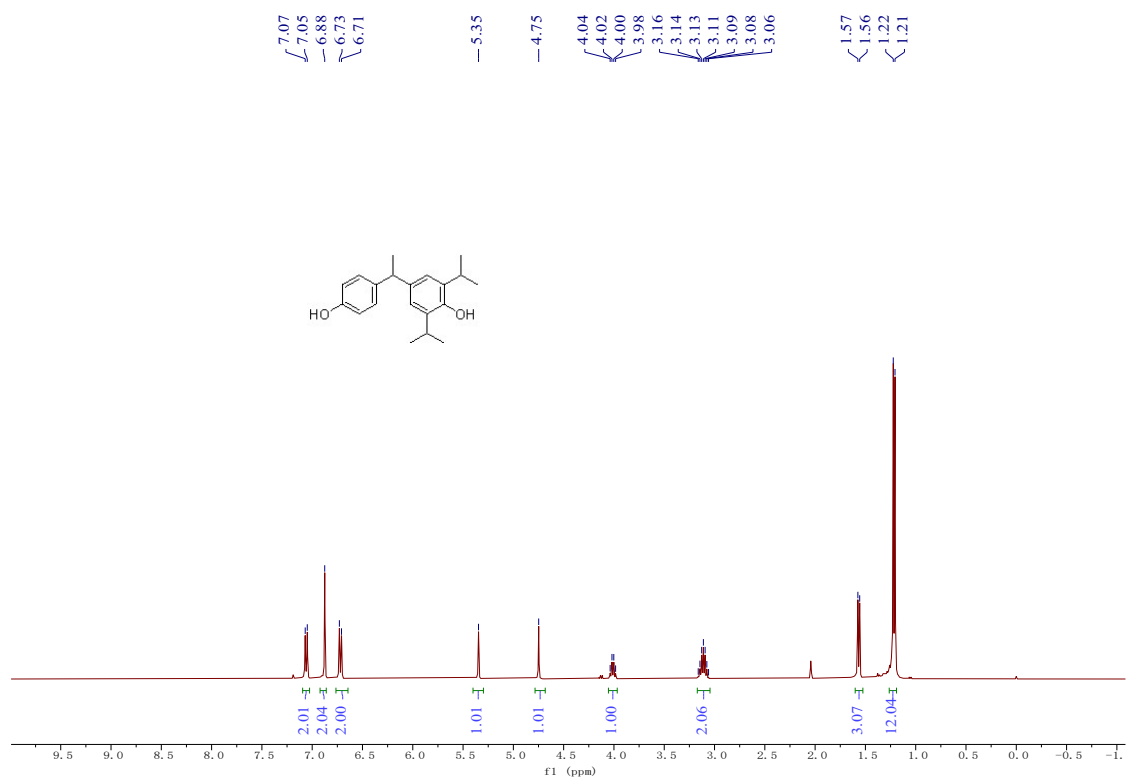

### <sup>13</sup>C NMR (100 MHz, CDCl<sub>3</sub>) spectrum of 3ao

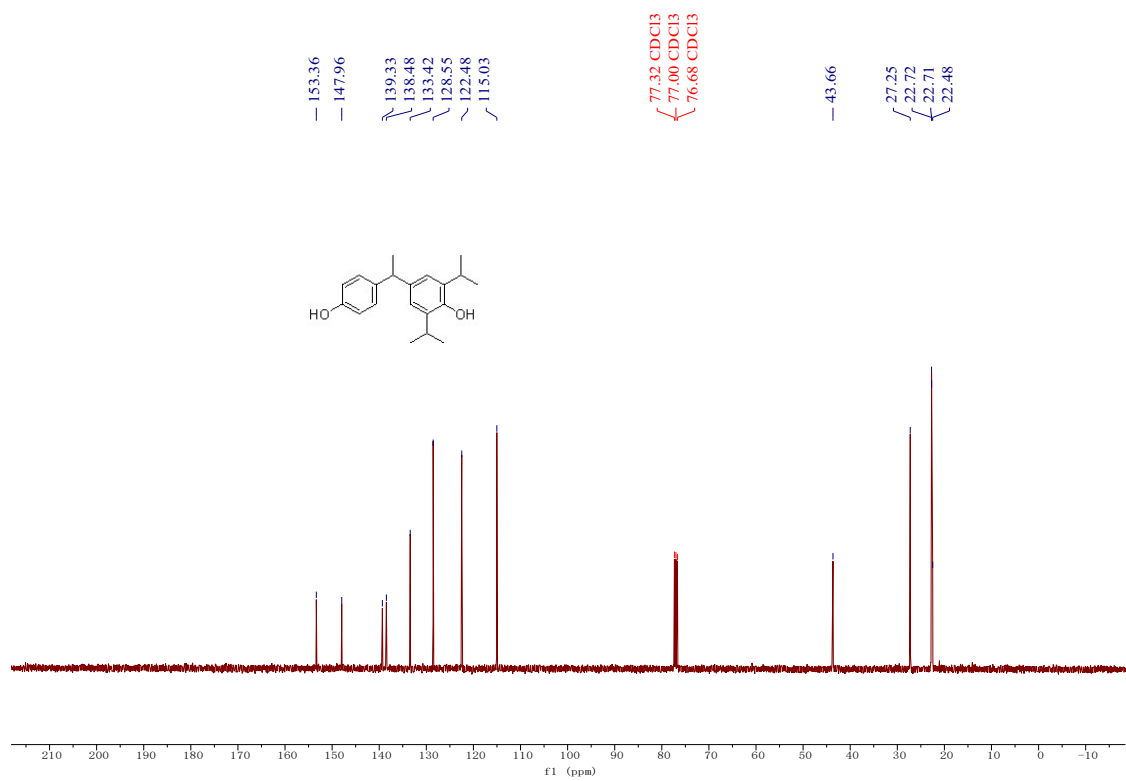

### <sup>1</sup>H NMR (400 MHz, CDCl<sub>3</sub>) spectrum of 3ap

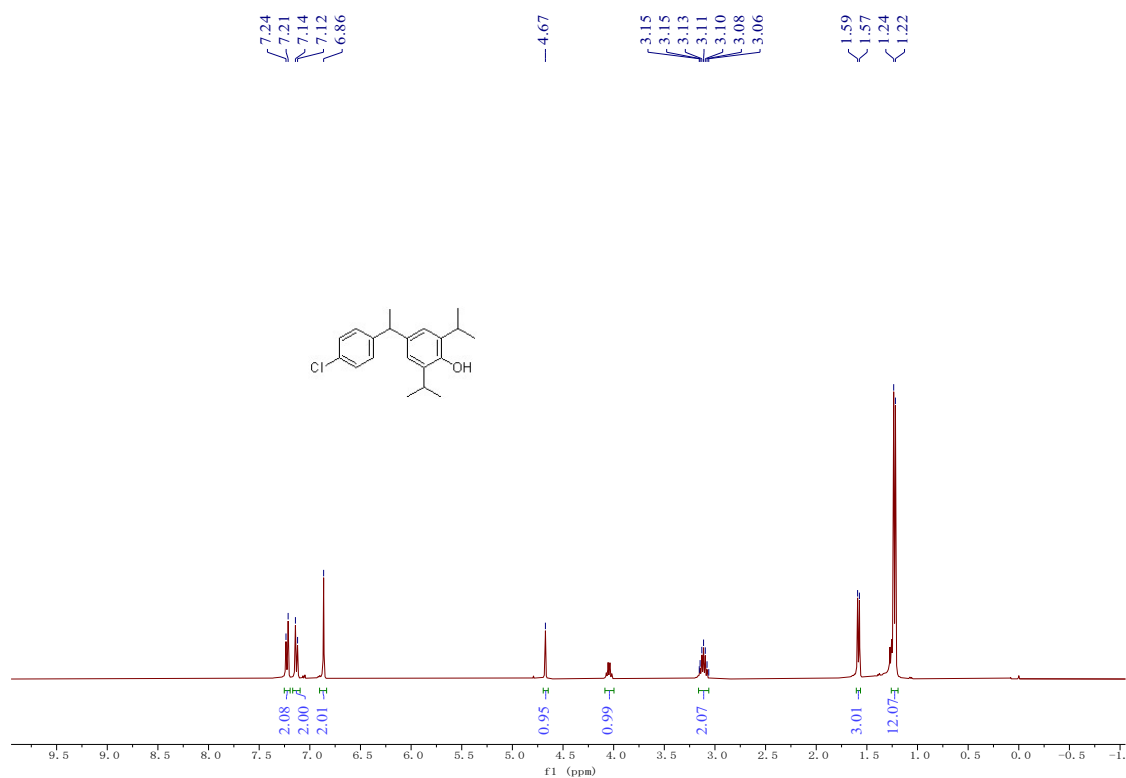

### <sup>13</sup>C NMR (100 MHz, CDCl<sub>3</sub>) spectrum of 3ap

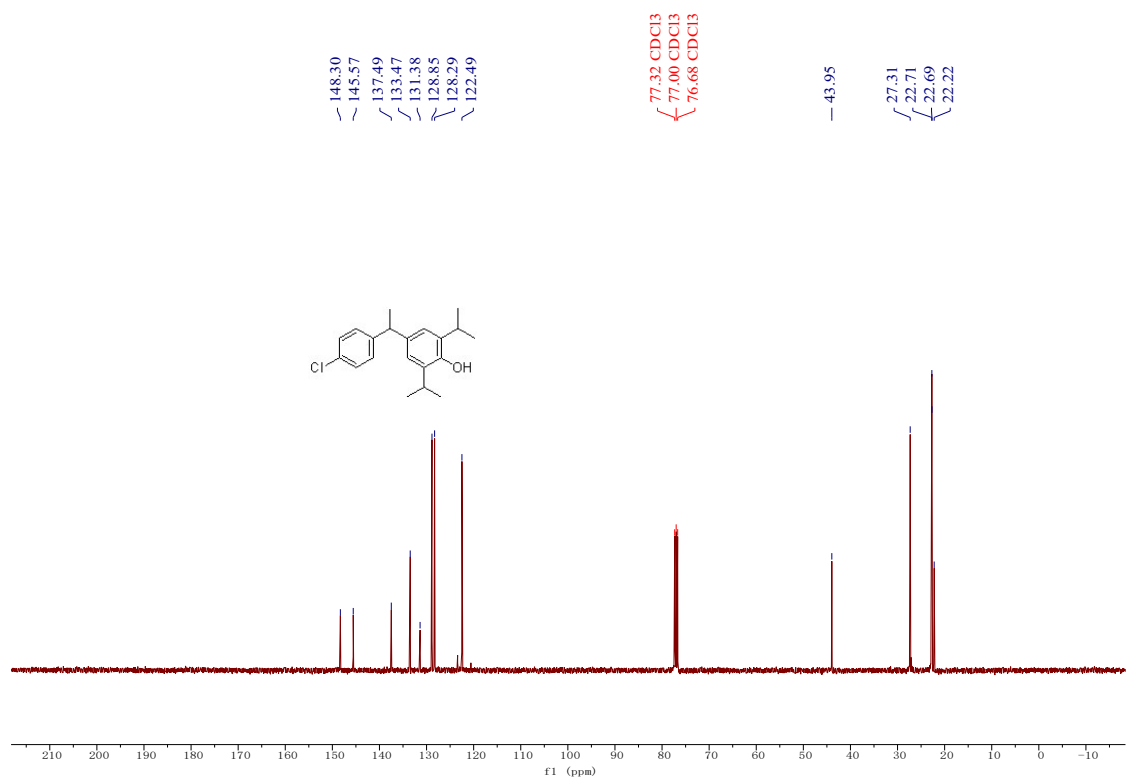



### <sup>1</sup>H NMR (400 MHz, CDCl<sub>3</sub>) spectrum of 3a

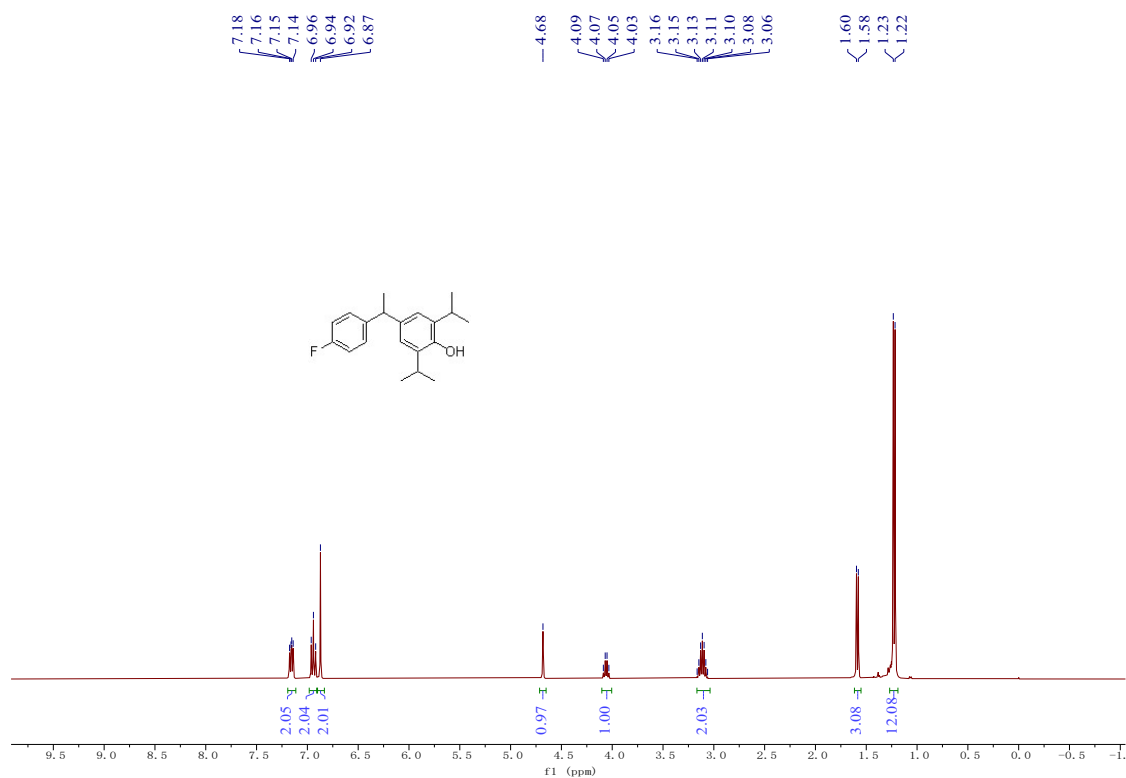

### <sup>13</sup>C NMR (100 MHz, CDCl<sub>3</sub>) spectrum of 3a

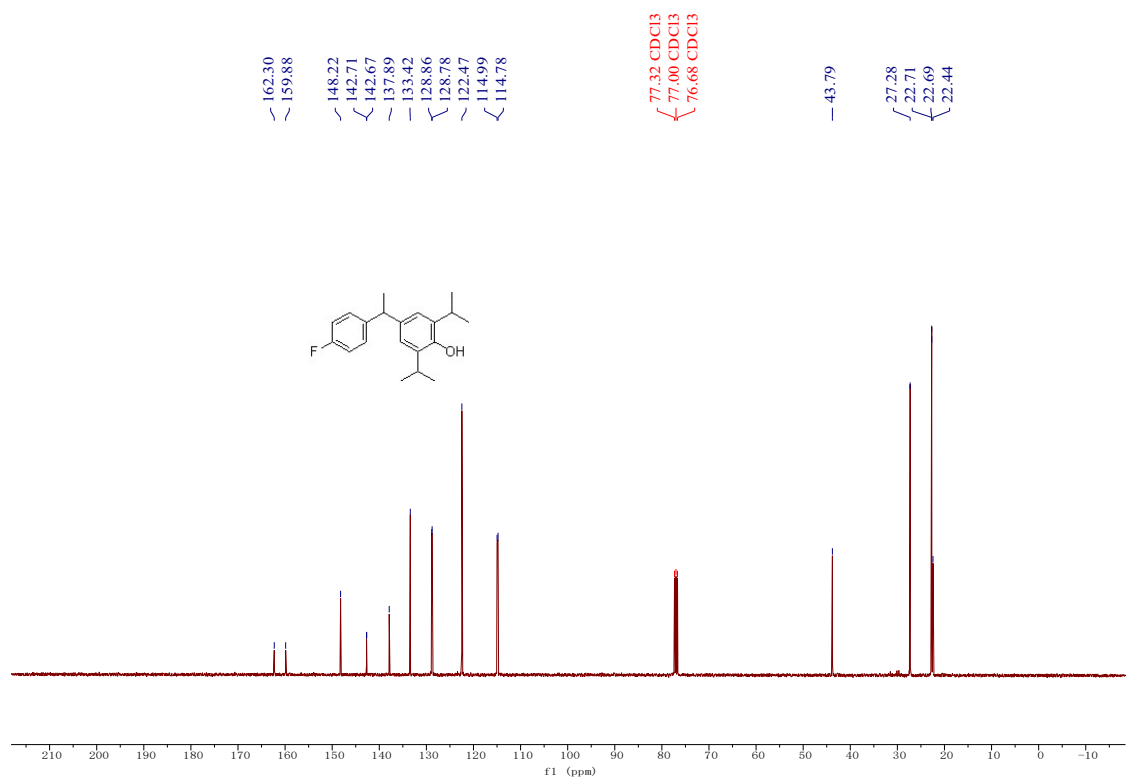

**$^{19}\text{F}$  NMR (377 MHz,  $\text{CDCl}_3$ ) spectrum of 3aq**

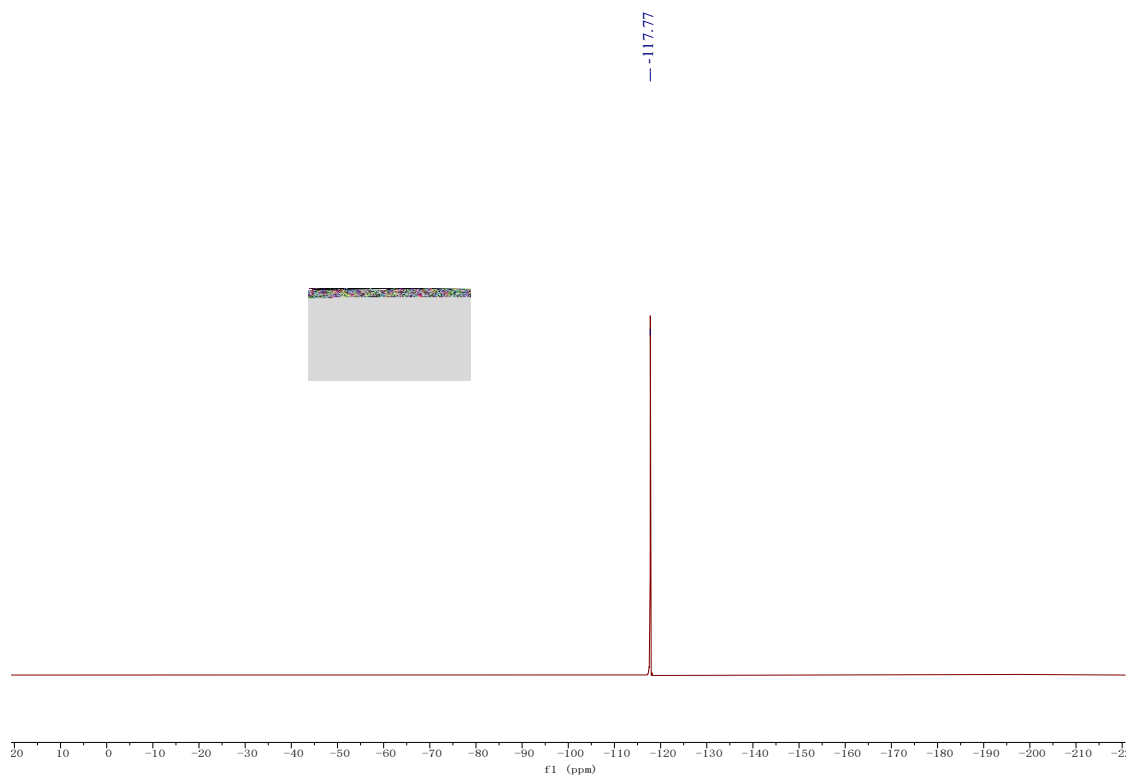

### <sup>1</sup>H NMR (400 MHz, CDCl<sub>3</sub>) spectrum of 3ar

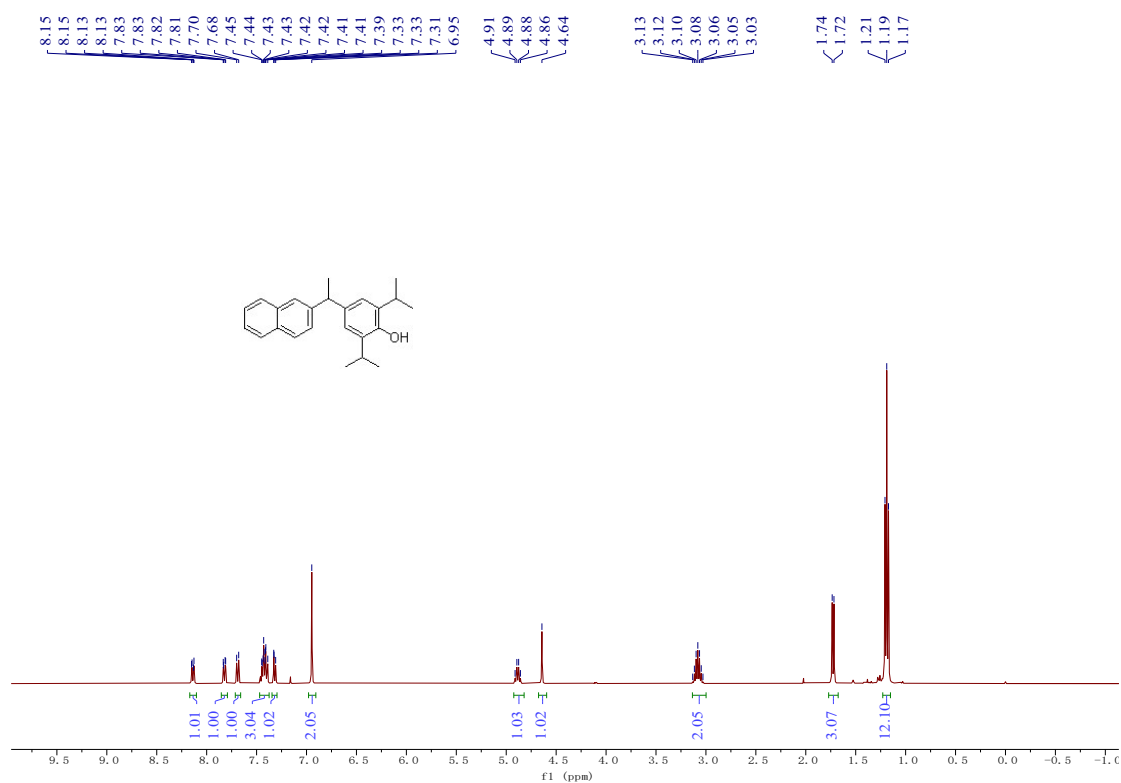

### <sup>13</sup>C NMR (100 MHz, CDCl<sub>3</sub>) spectrum of 3ar

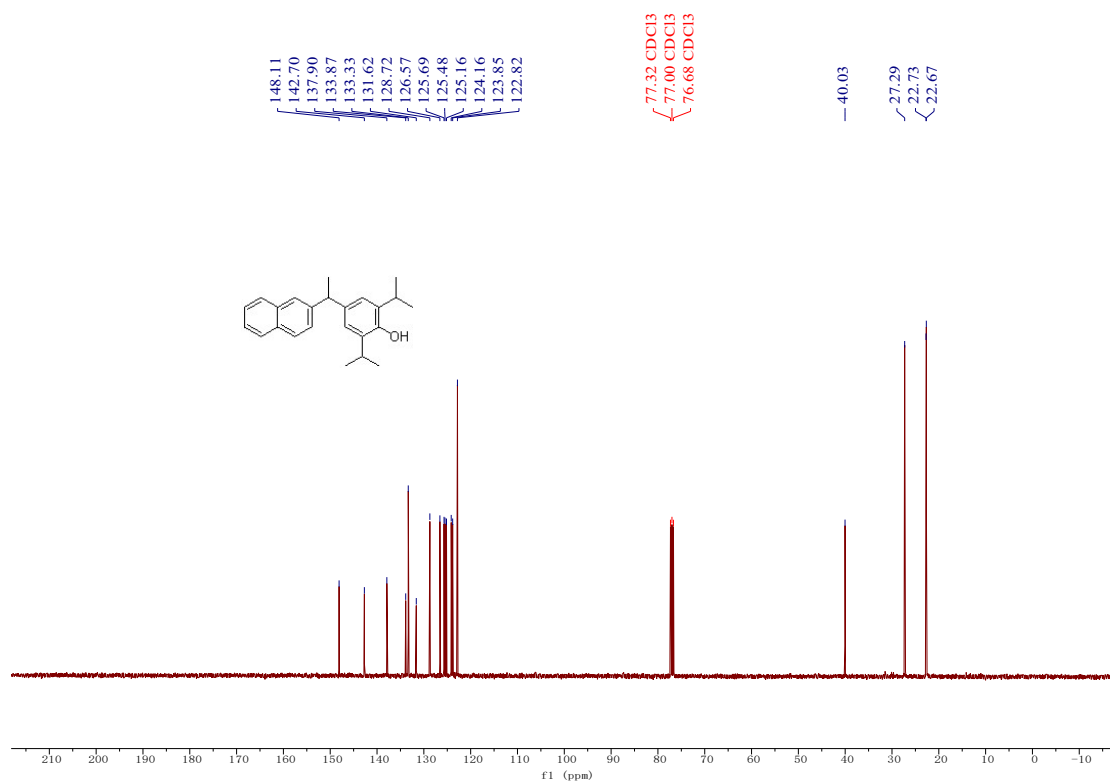

### <sup>1</sup>H NMR (400 MHz, CDCl<sub>3</sub>) spectrum of 3as

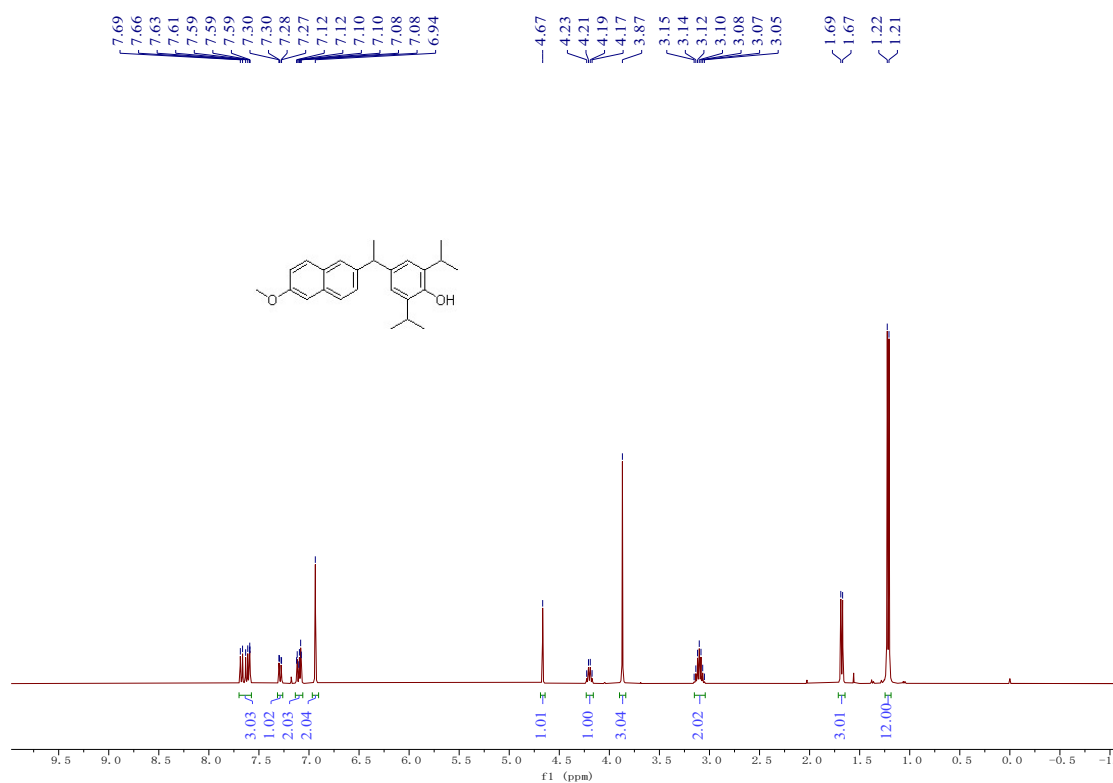

### <sup>13</sup>C NMR (100 MHz, CDCl<sub>3</sub>) spectrum of 3as

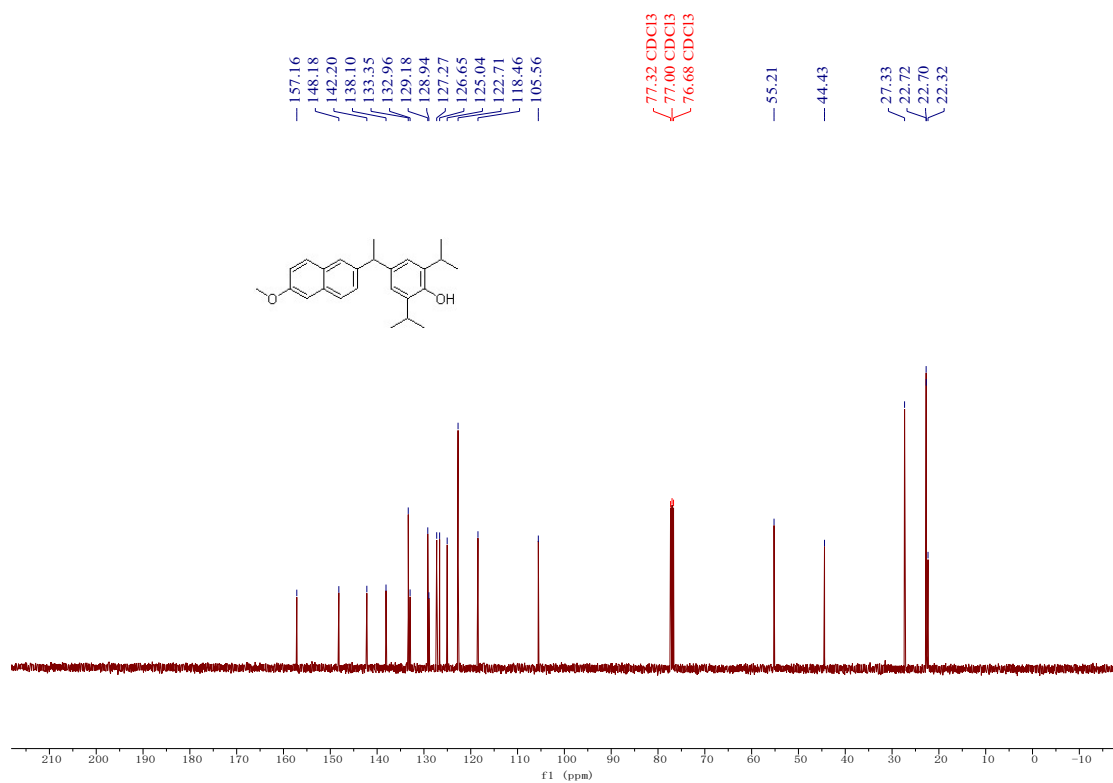

### <sup>1</sup>H NMR (400 MHz, CDCl<sub>3</sub>) spectrum of 3at

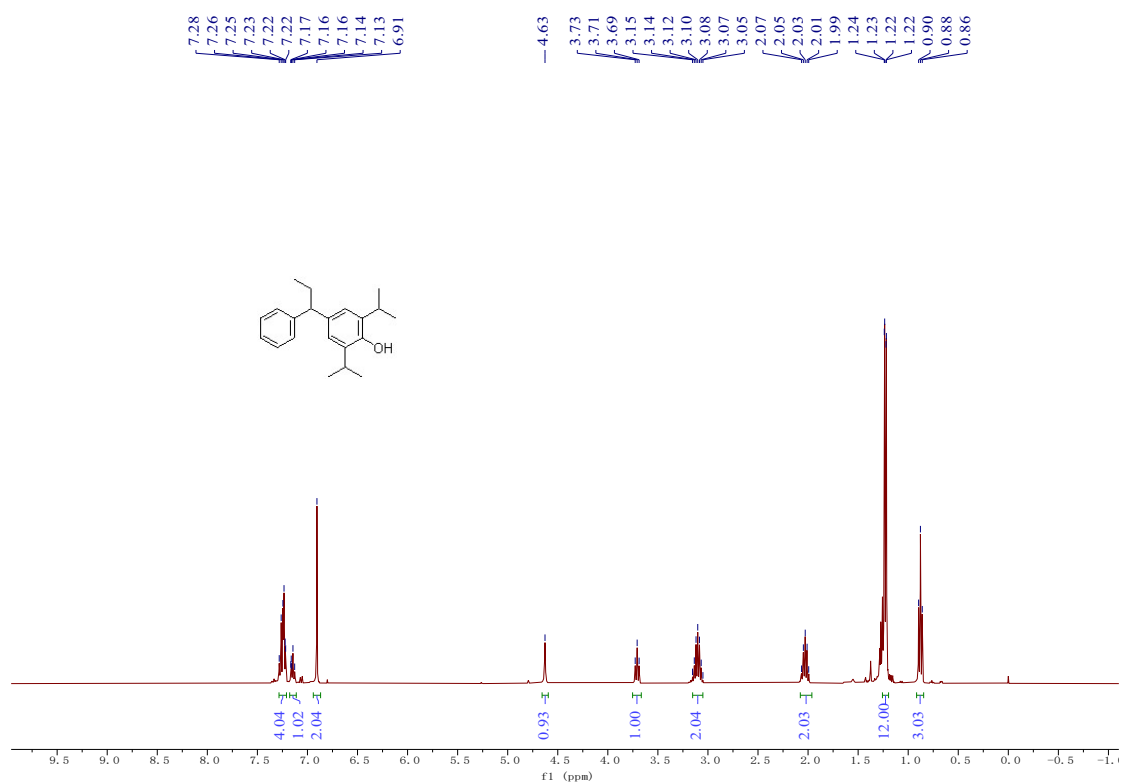

### <sup>13</sup>C NMR (100 MHz, CDCl<sub>3</sub>) spectrum of 3at

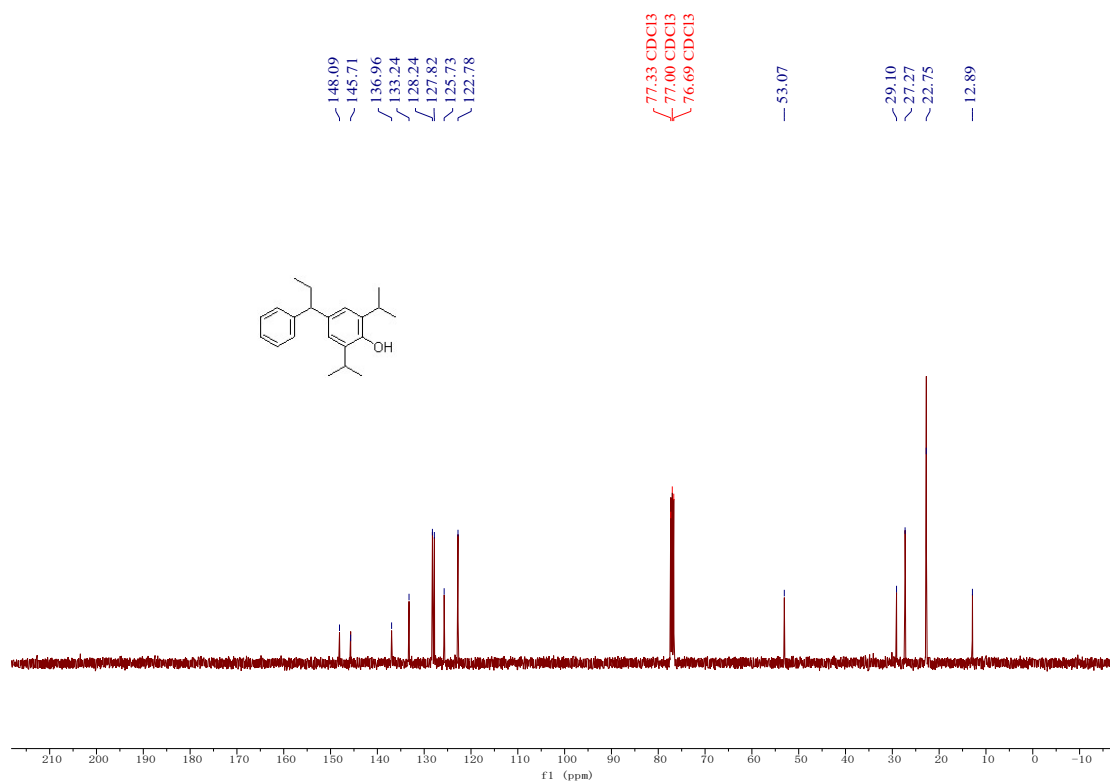

### <sup>1</sup>H NMR (400 MHz, CDCl<sub>3</sub>) spectrum of 3au

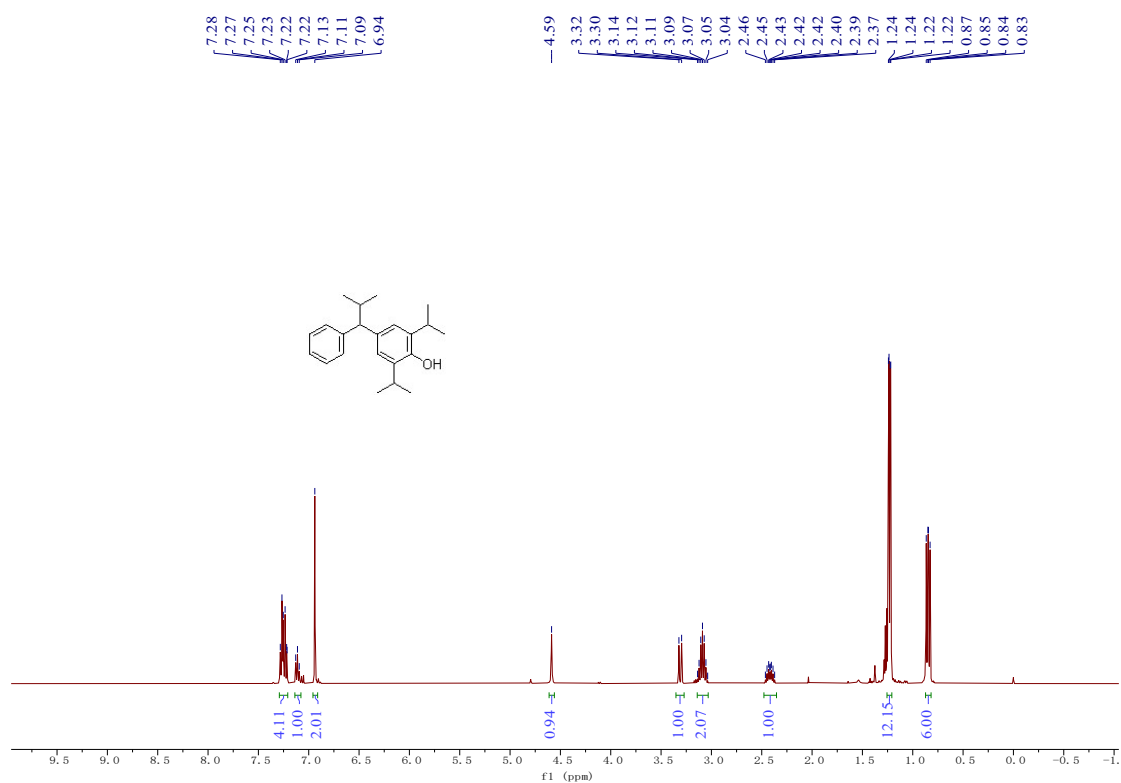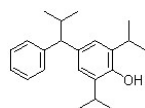

### <sup>13</sup>C NMR (100 MHz, CDCl<sub>3</sub>) spectrum of 3au

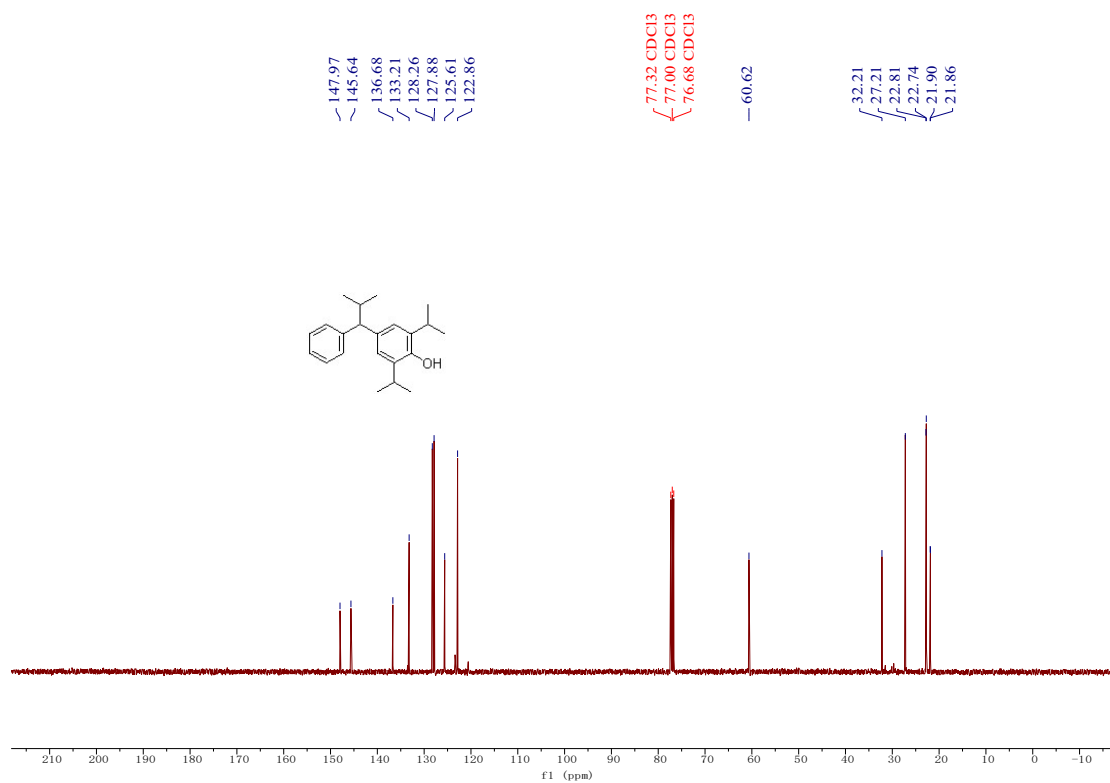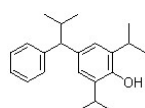

### <sup>1</sup>H NMR (400 MHz, CDCl<sub>3</sub>) spectrum of 3av

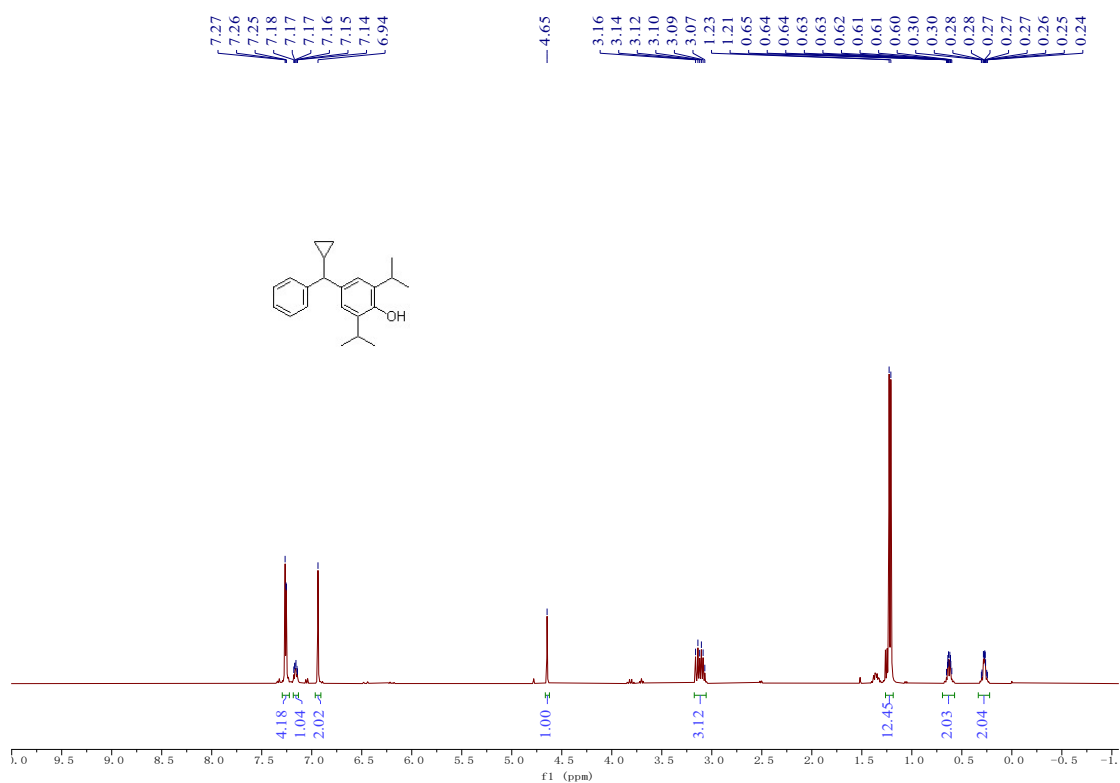

### <sup>13</sup>C NMR (100 MHz, CDCl<sub>3</sub>) spectrum of 3av

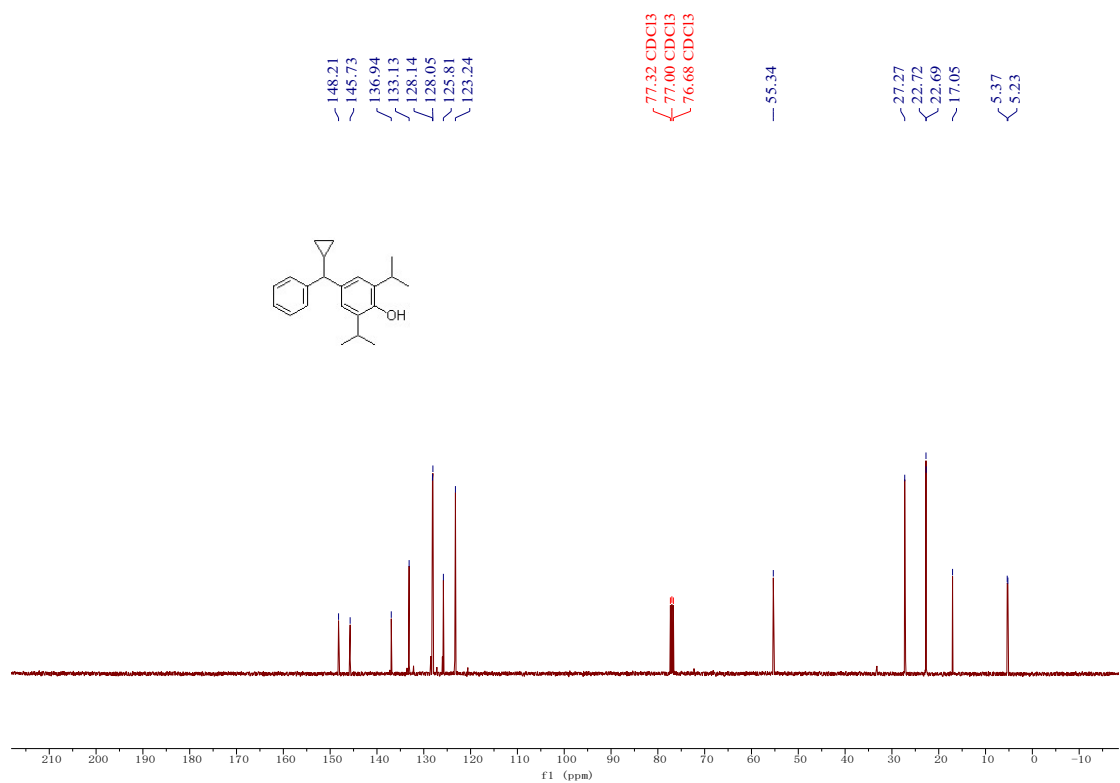

**<sup>1</sup>H NMR (400 MHz, CDCl<sub>3</sub>) spectrum of 3aw**

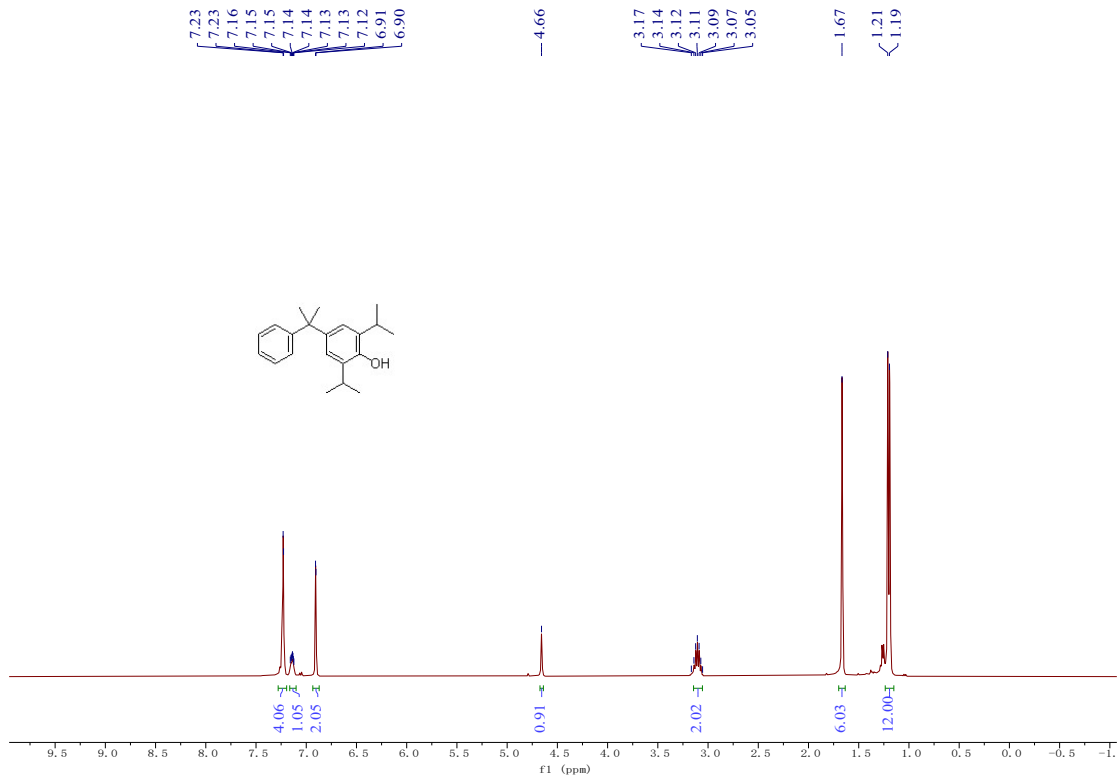

**<sup>13</sup>C NMR (100 MHz, CDCl<sub>3</sub>) spectrum of 3aw**

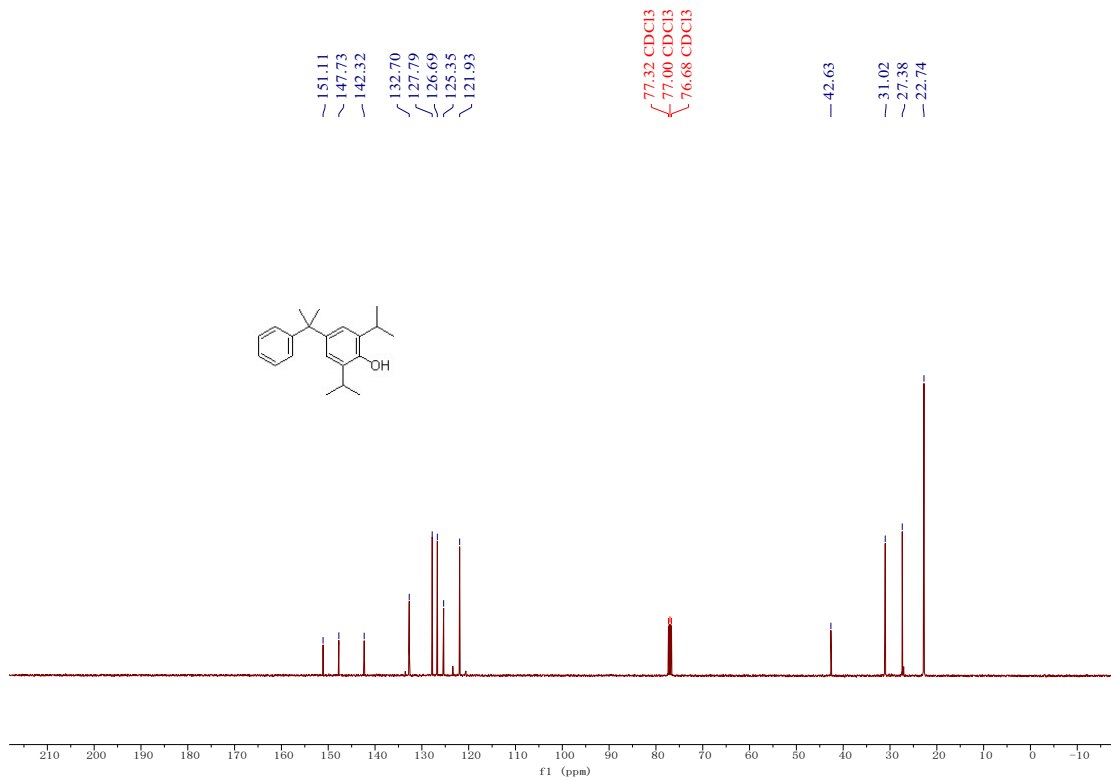



### <sup>1</sup>H NMR (400 MHz, CDCl<sub>3</sub>) spectrum of 3ax

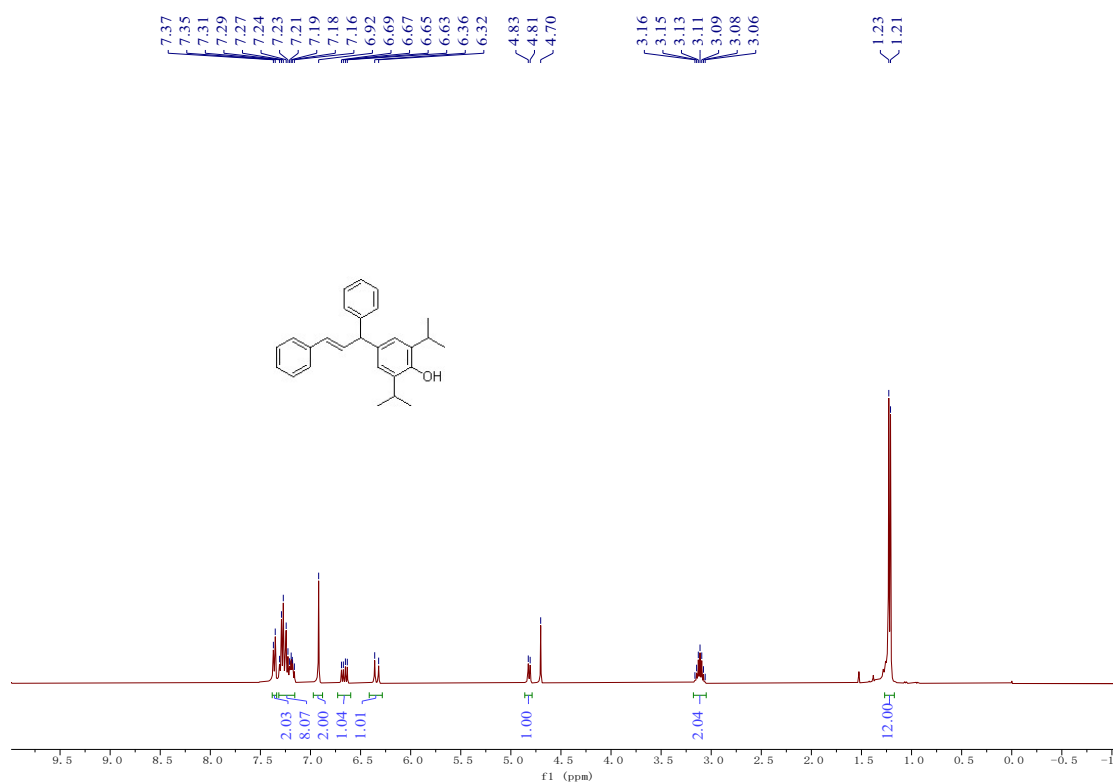

### <sup>13</sup>C NMR (100 MHz, CDCl<sub>3</sub>) spectrum of 3ax

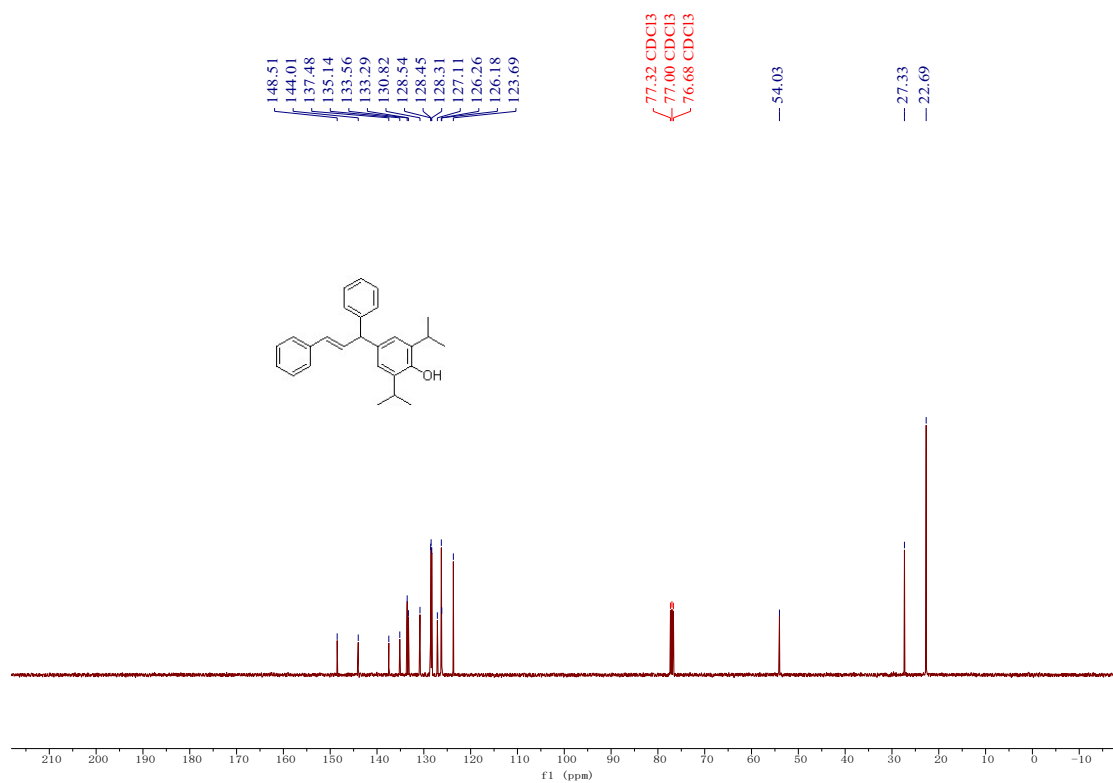

### <sup>1</sup>H NMR (400 MHz, CDCl<sub>3</sub>) spectrum of 3ay

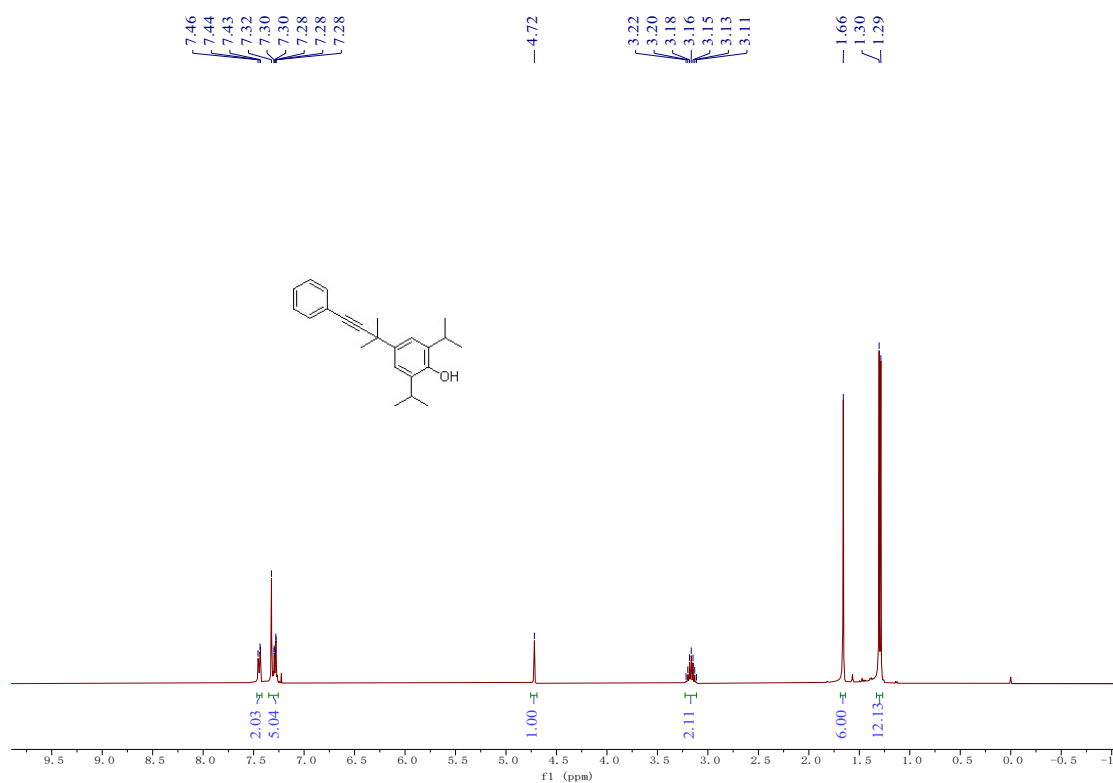

### <sup>13</sup>C NMR (100 MHz, CDCl<sub>3</sub>) spectrum of 3ay

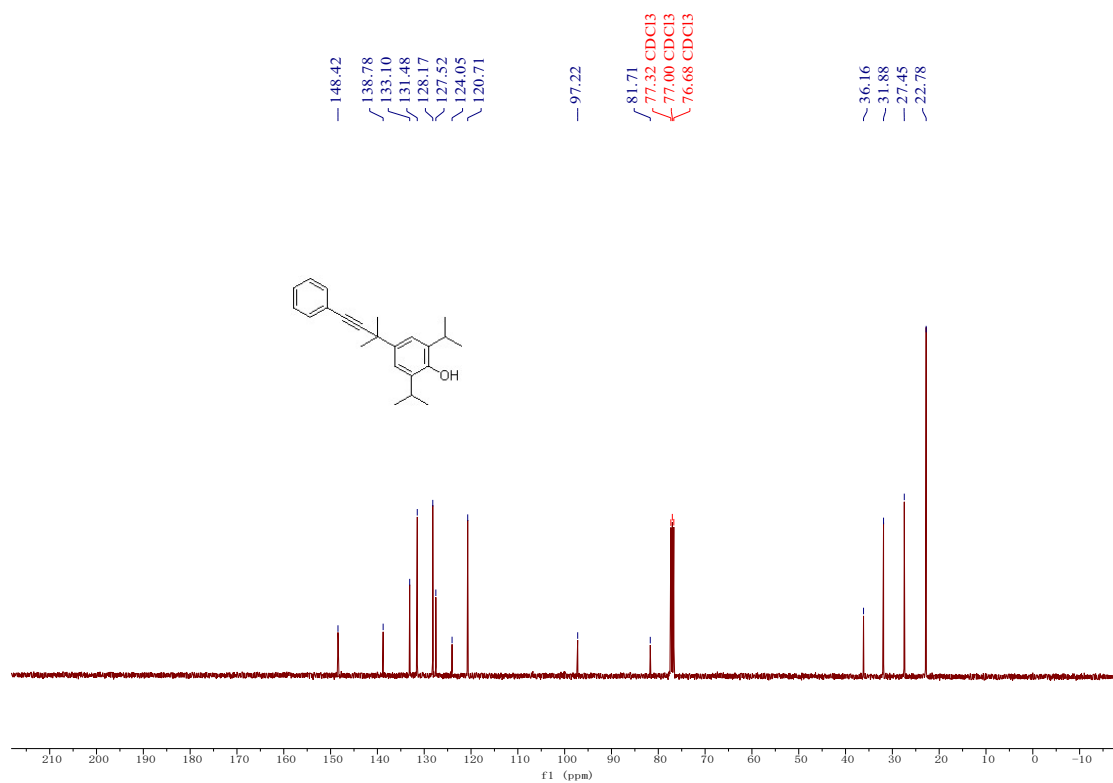

### <sup>1</sup>H NMR (400 MHz, CDCl<sub>3</sub>) spectrum of 3ba

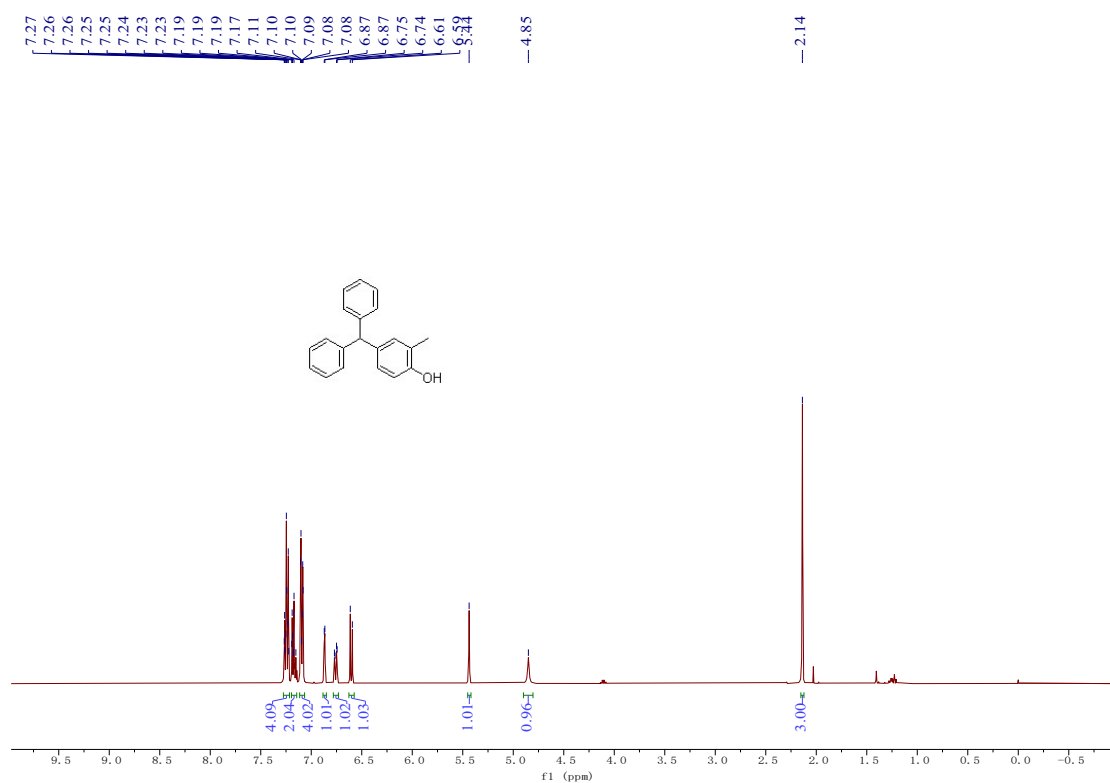

### <sup>13</sup>C NMR (100 MHz, CDCl<sub>3</sub>) spectrum of 3ba

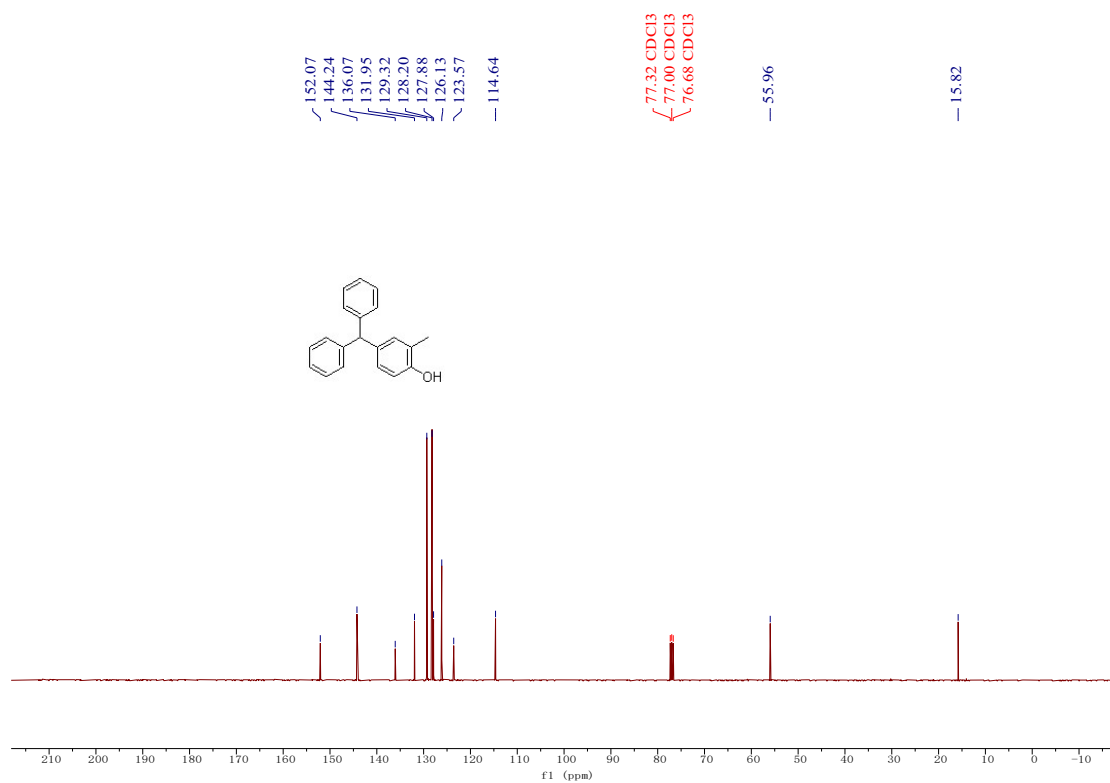

### <sup>1</sup>H NMR (400 MHz, CDCl<sub>3</sub>) spectrum of 3ca

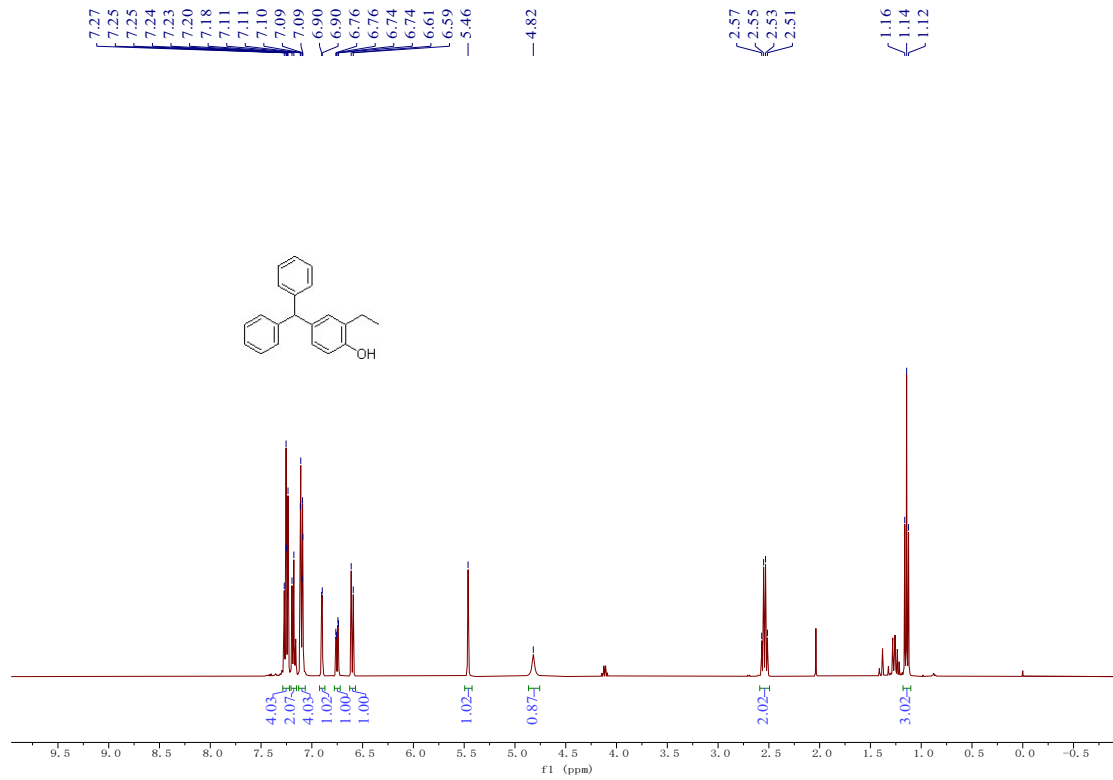

### <sup>13</sup>C NMR (100 MHz, CDCl<sub>3</sub>) spectrum of 3ca

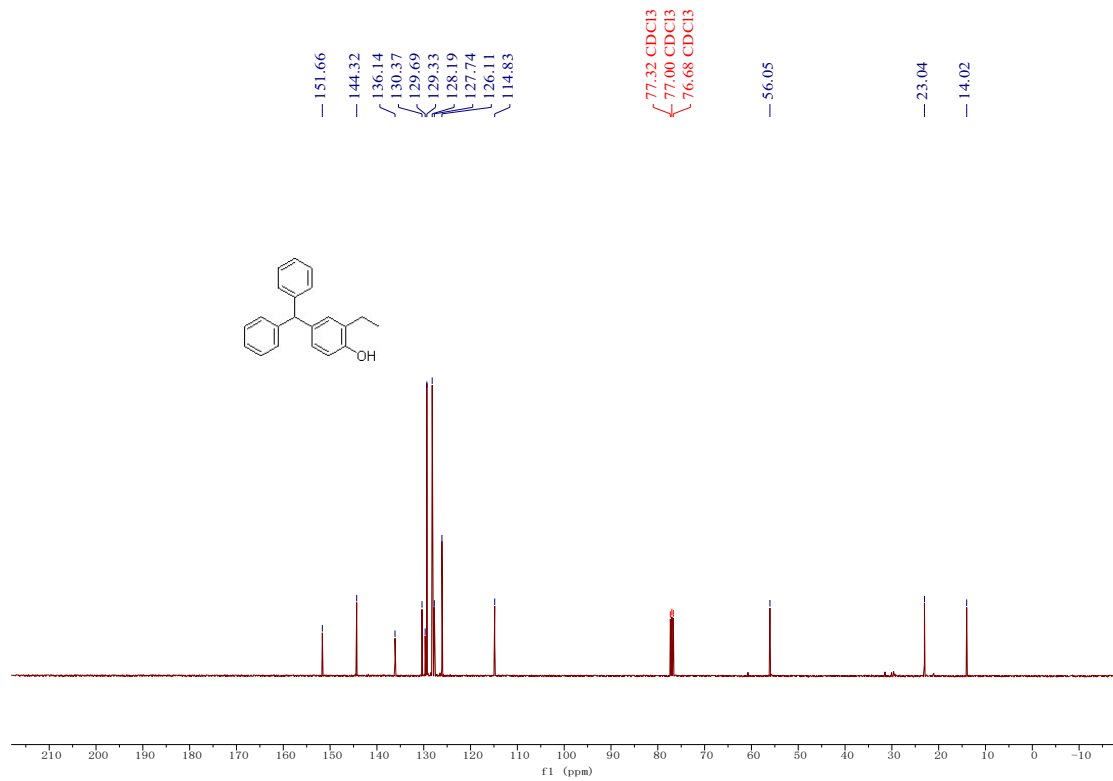

### <sup>1</sup>H NMR (400 MHz, CDCl<sub>3</sub>) spectrum of 3da

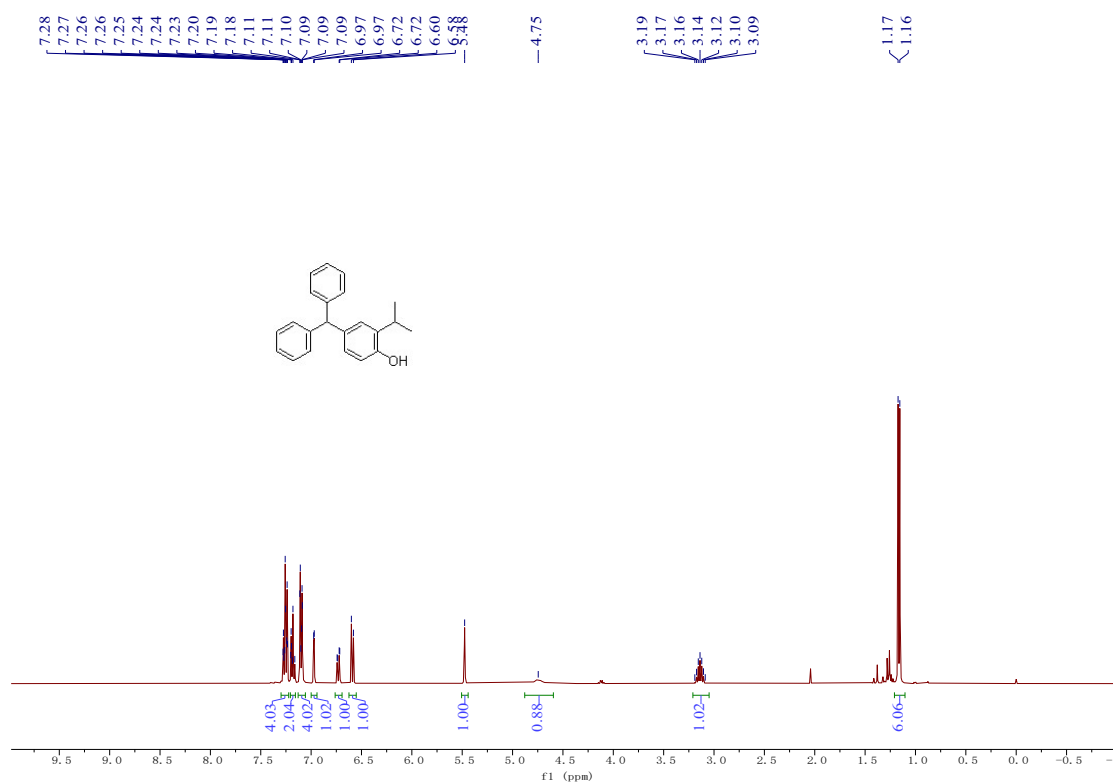

### <sup>13</sup>C NMR (100 MHz, CDCl<sub>3</sub>) spectrum of 3da

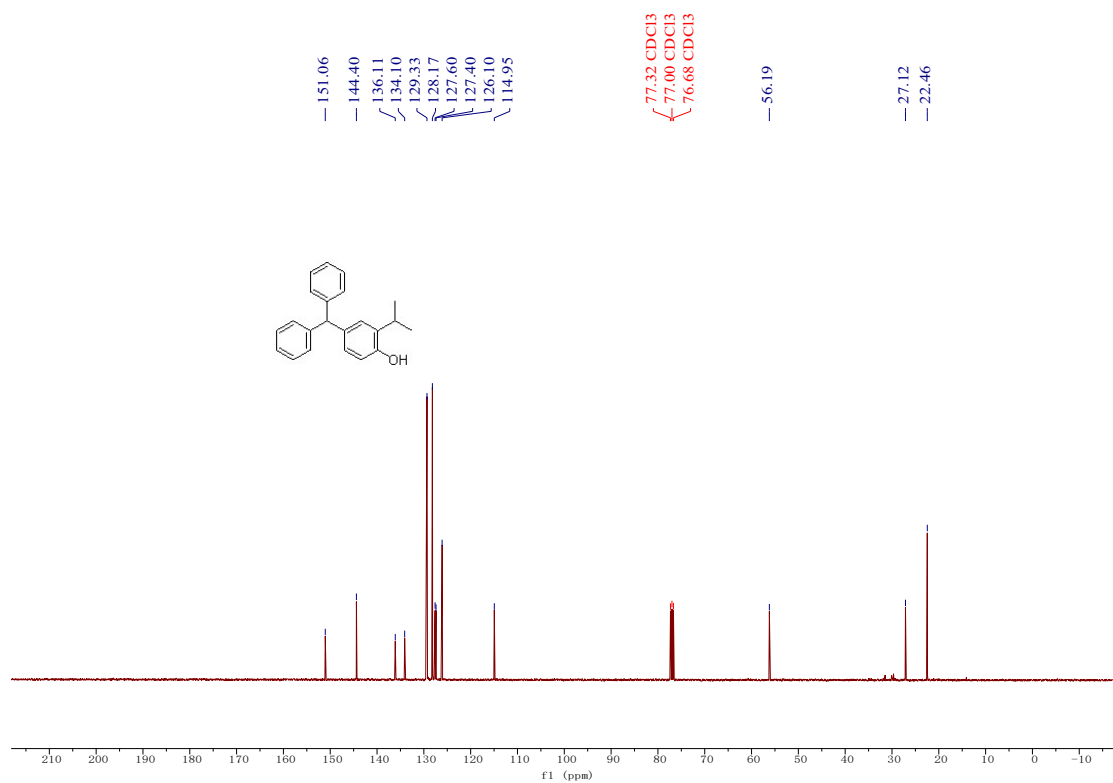

### <sup>1</sup>H NMR (400 MHz, CDCl<sub>3</sub>) spectrum of 3ea

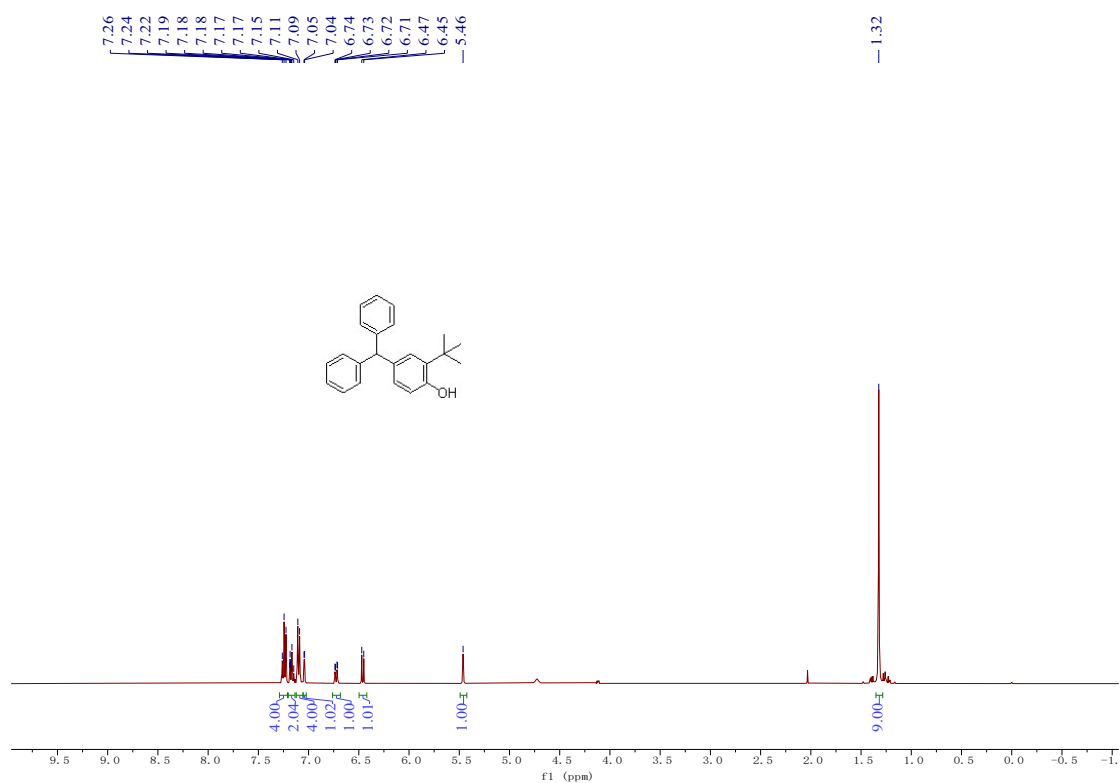

### <sup>13</sup>C NMR (100 MHz, CDCl<sub>3</sub>) spectrum of 3ea

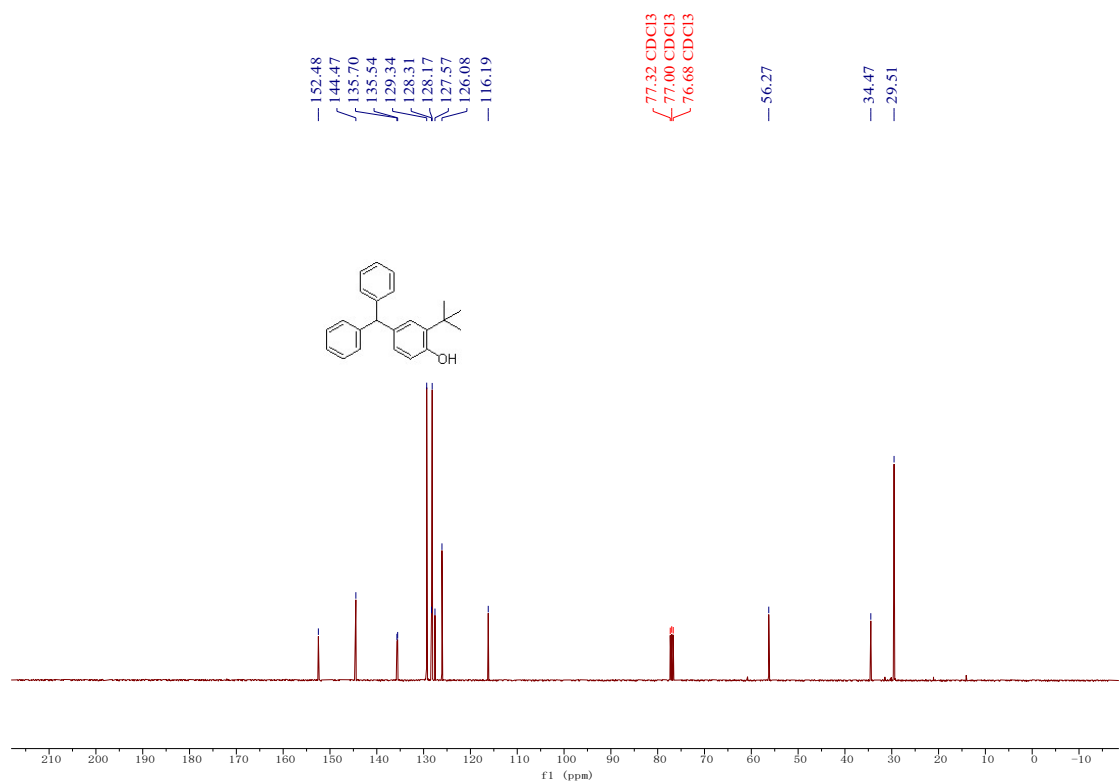

### <sup>1</sup>H NMR (400 MHz, CDCl<sub>3</sub>) spectrum of 3fa

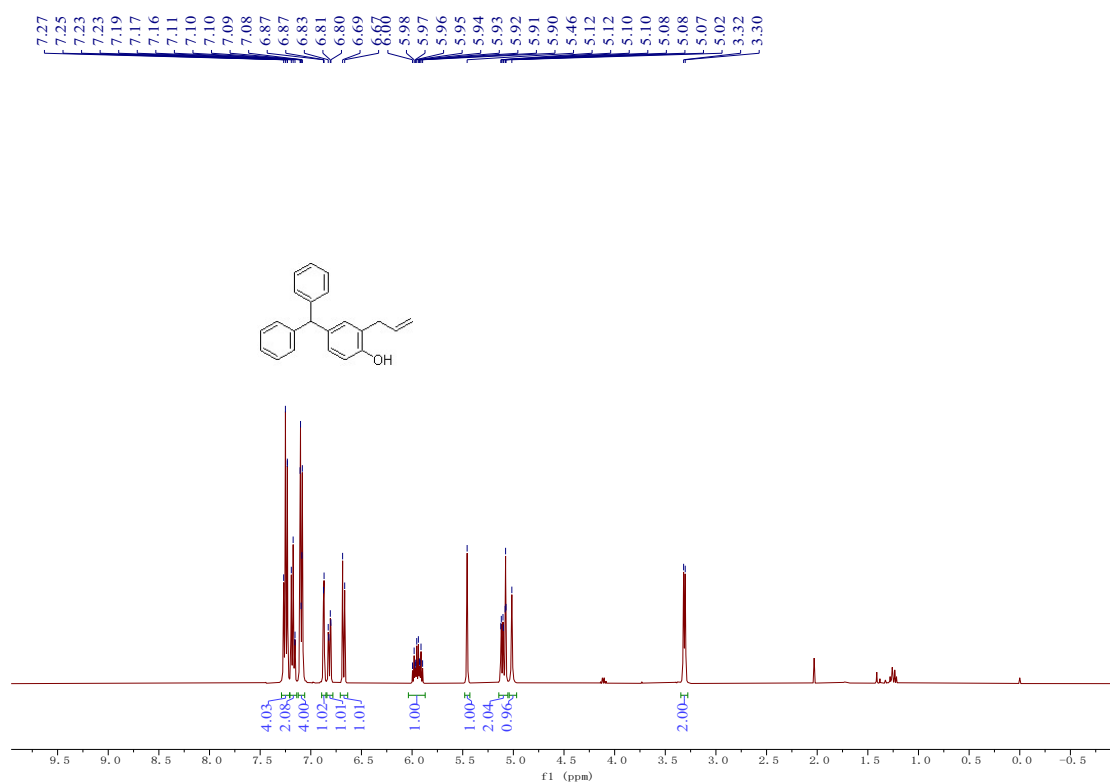

### <sup>13</sup>C NMR (100 MHz, CDCl<sub>3</sub>) spectrum of 3fa

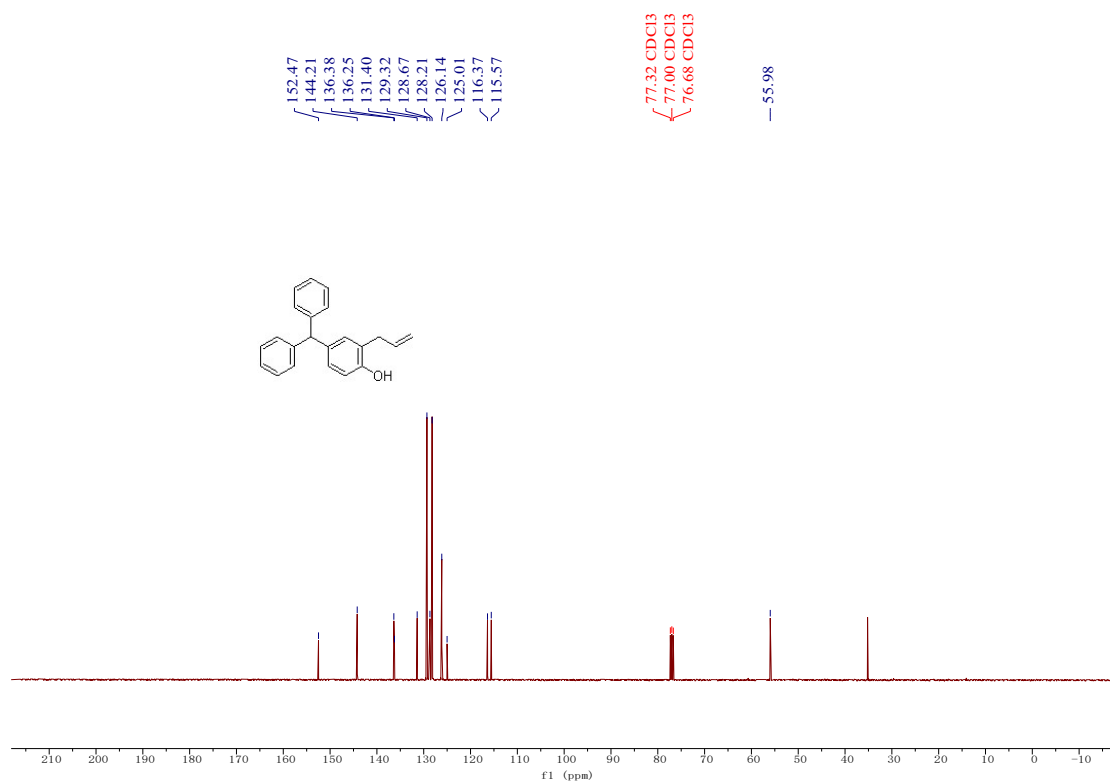

### <sup>1</sup>H NMR (400 MHz, CDCl<sub>3</sub>) spectrum of 3ga

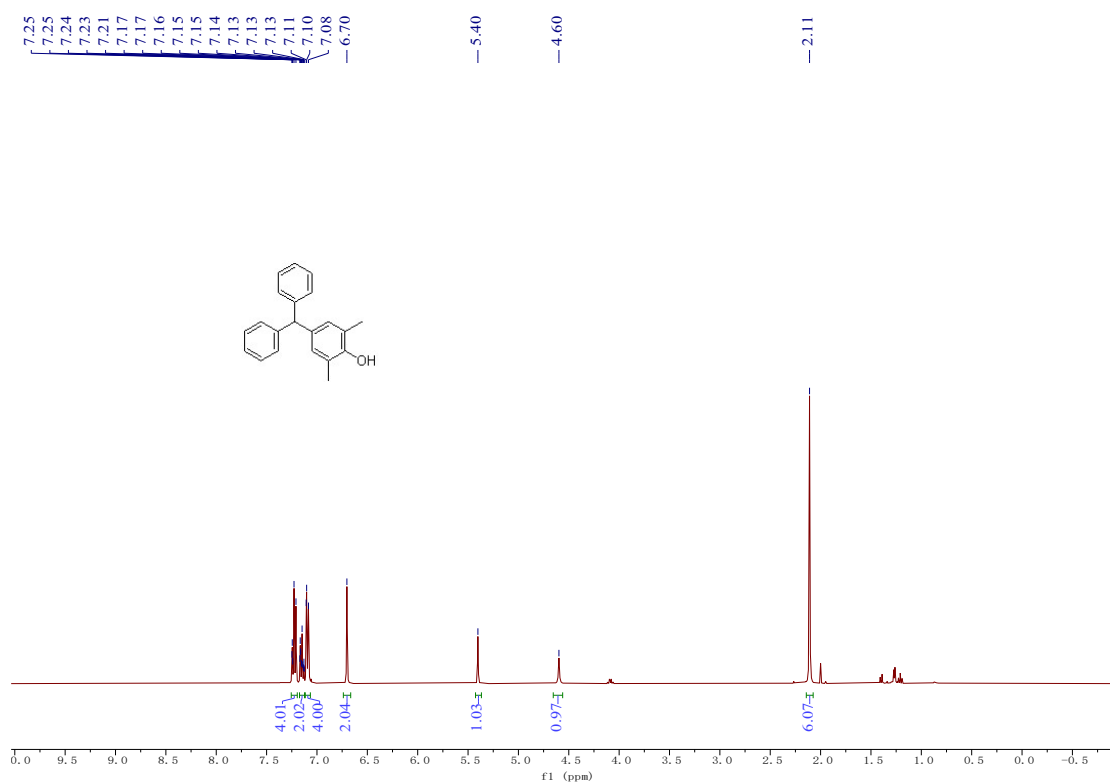

### <sup>13</sup>C NMR (100 MHz, CDCl<sub>3</sub>) spectrum of 3ga

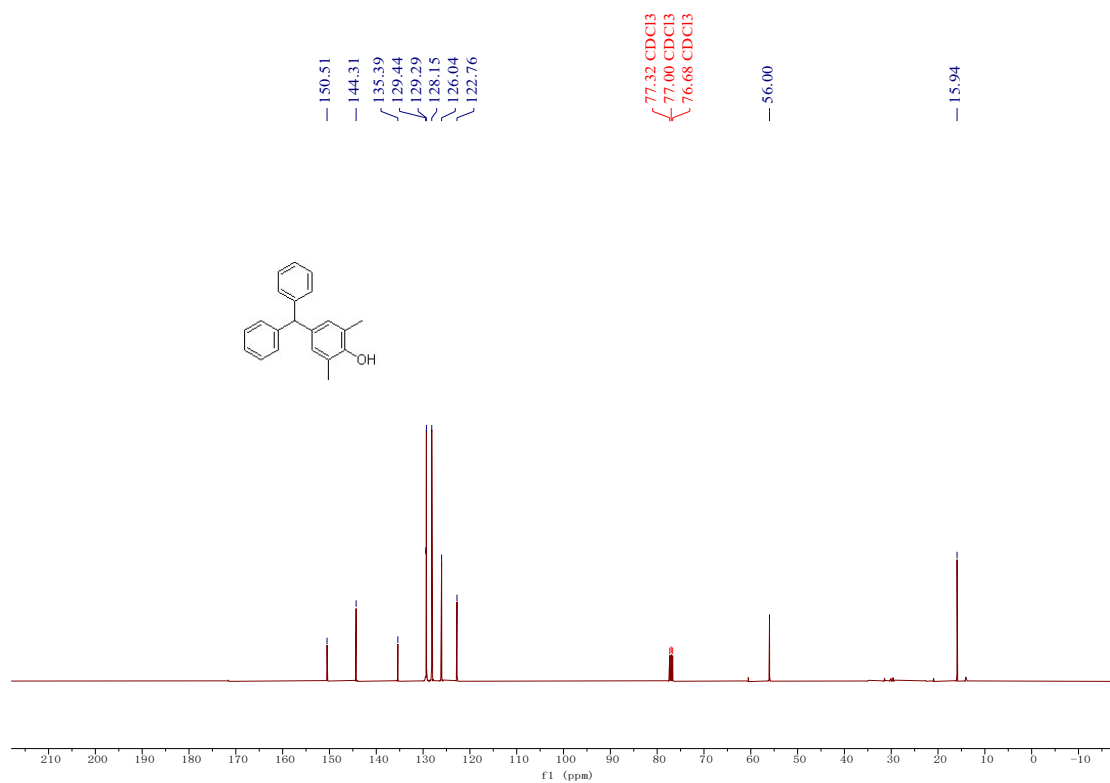



### <sup>1</sup>H NMR (400 MHz, CDCl<sub>3</sub>) spectrum of 3ha

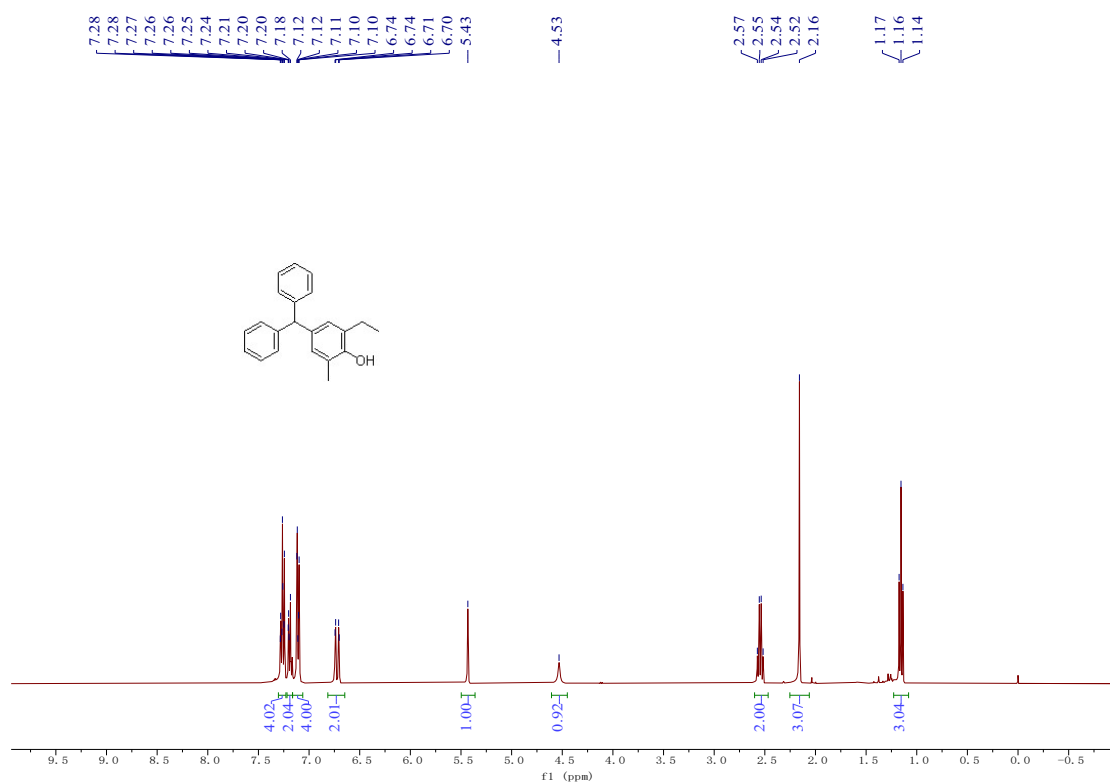

### <sup>13</sup>C NMR (100 MHz, CDCl<sub>3</sub>) spectrum of 3ha

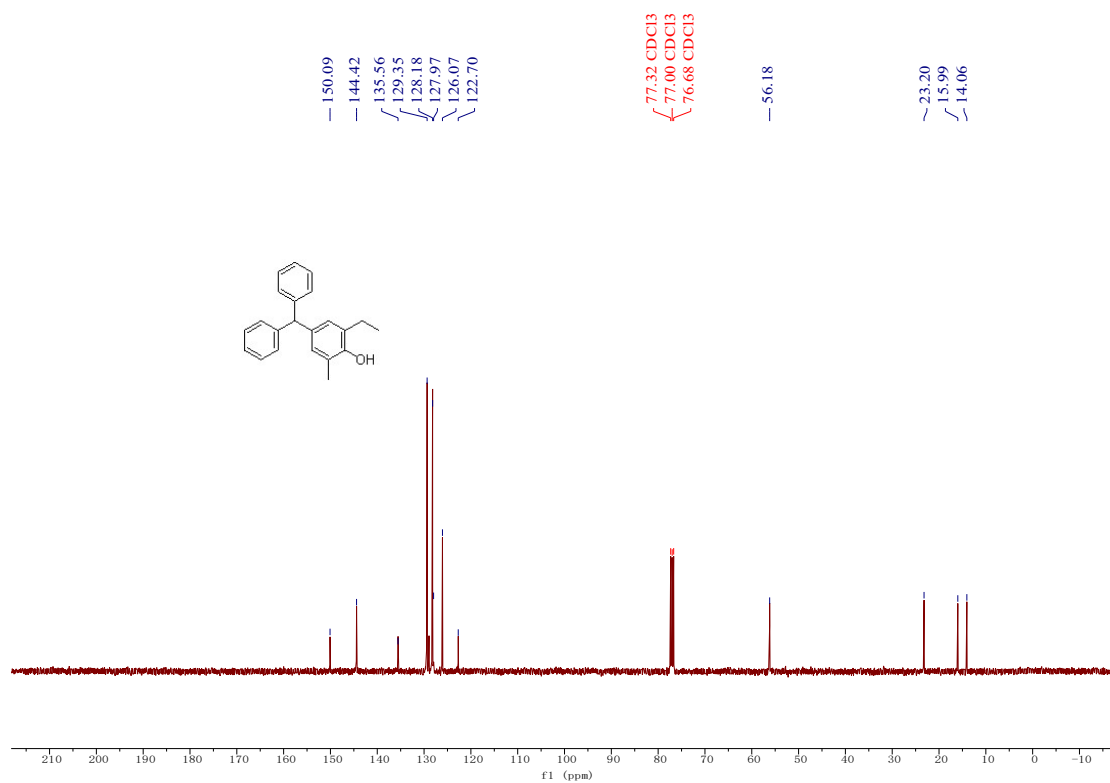

### <sup>1</sup>H NMR (400 MHz, CDCl<sub>3</sub>) spectrum of 3ia

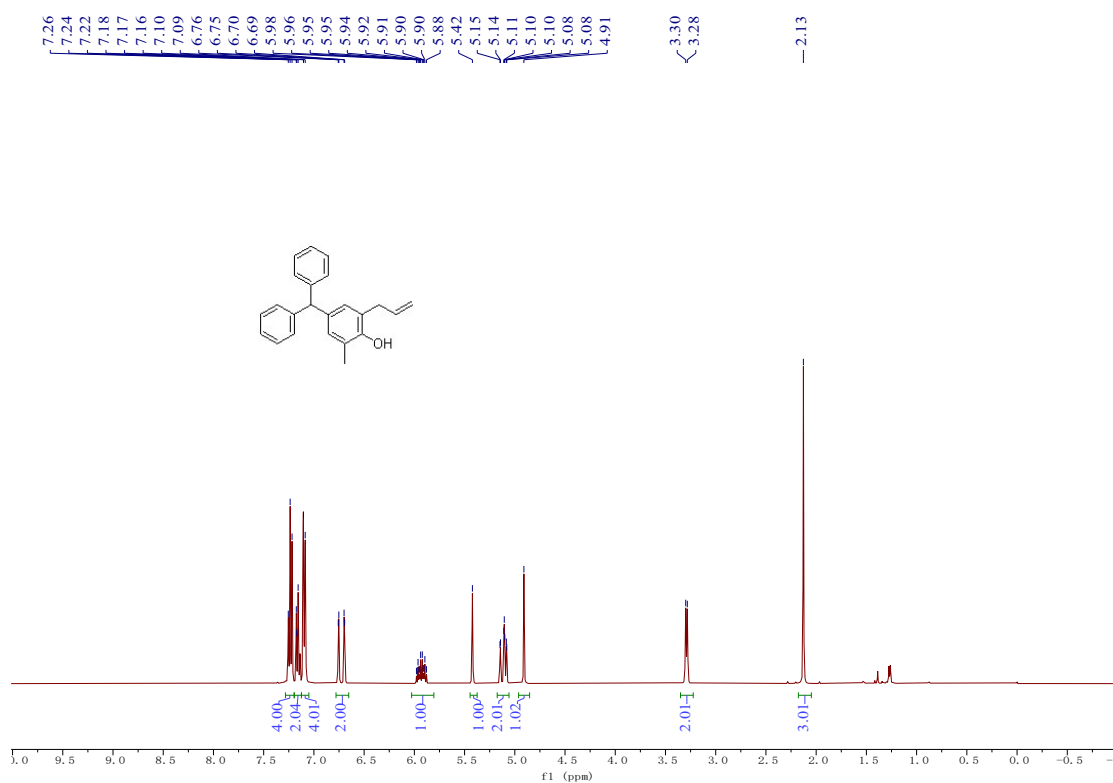

### <sup>13</sup>C NMR (100 MHz, CDCl<sub>3</sub>) spectrum of 3ia

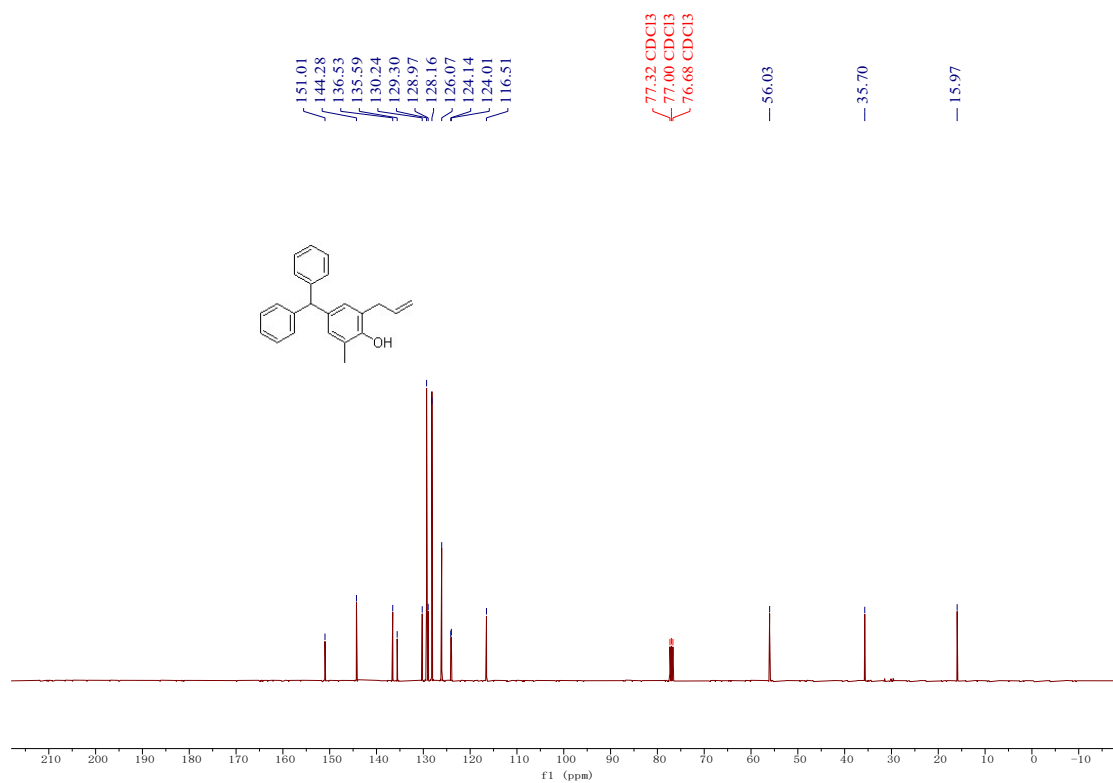

### <sup>1</sup>H NMR (400 MHz, CDCl<sub>3</sub>) spectrum of 3ja

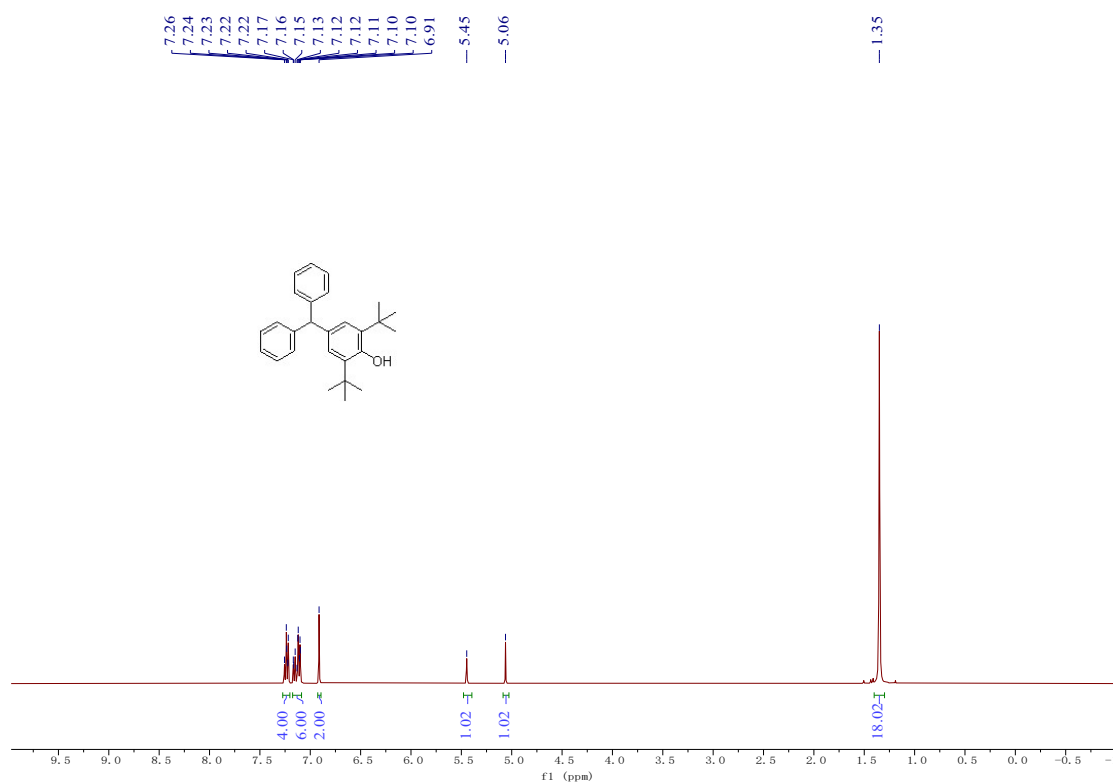

### <sup>13</sup>C NMR (100 MHz, CDCl<sub>3</sub>) spectrum of 3ja

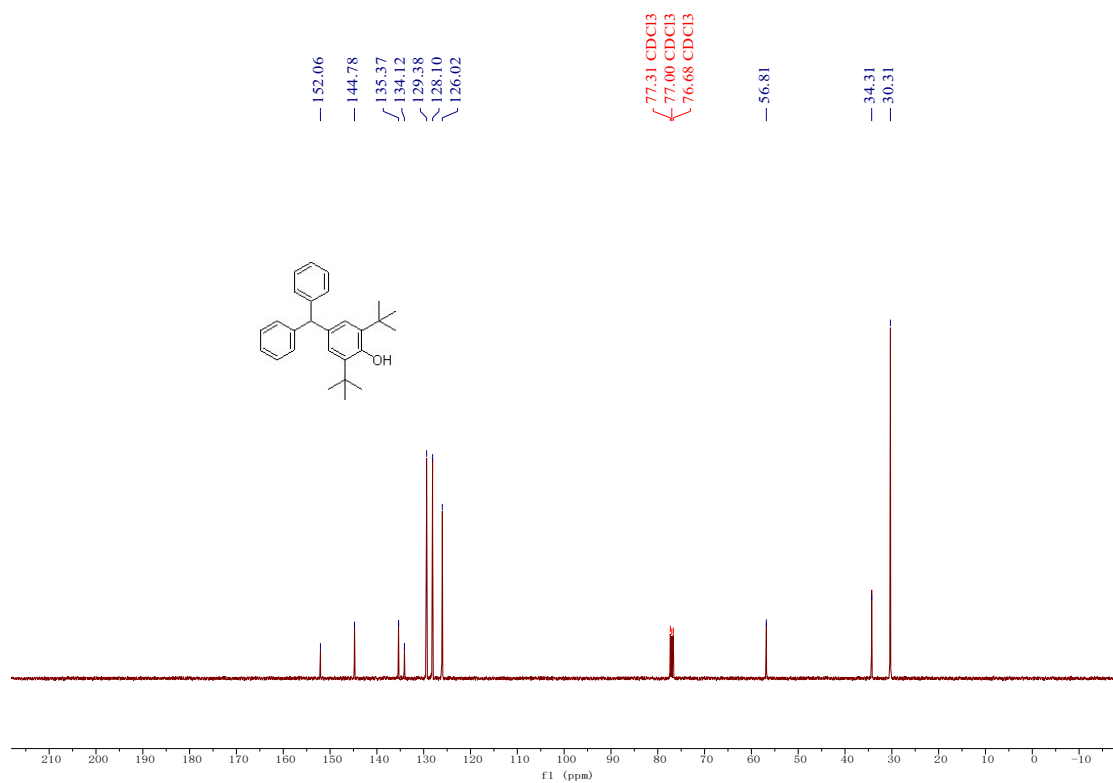

### <sup>1</sup>H NMR (400 MHz, CDCl<sub>3</sub>) spectrum of 5aa

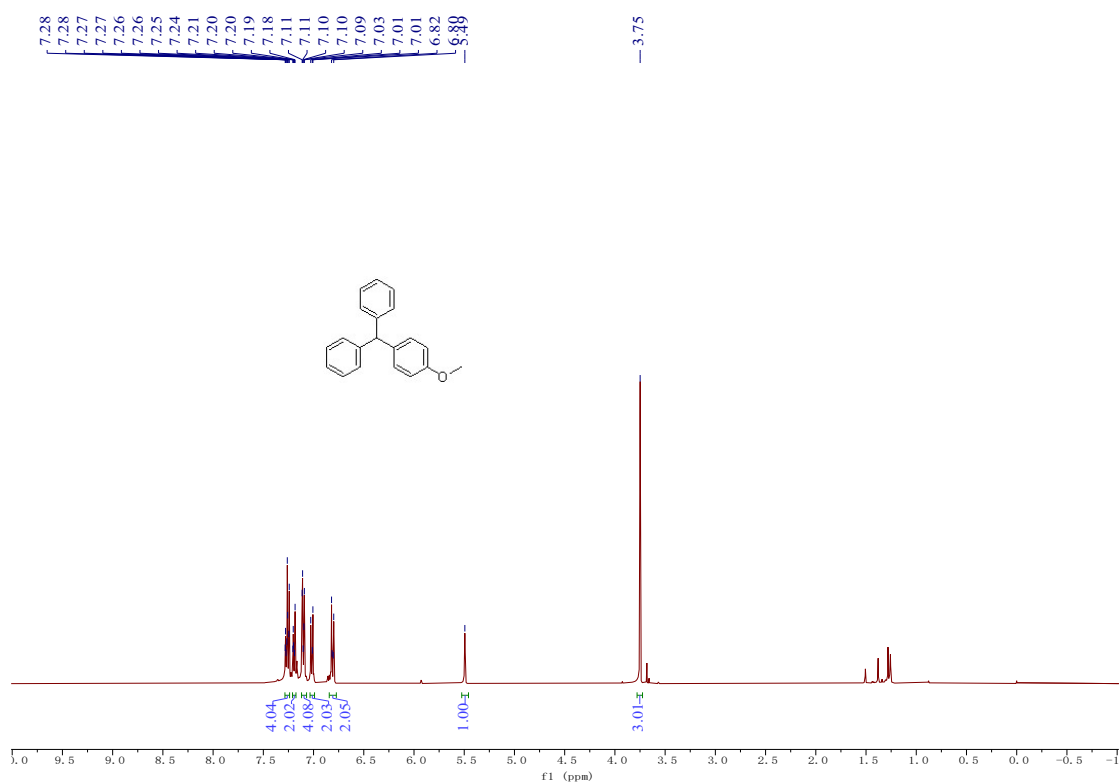

### <sup>13</sup>C NMR (100 MHz, CDCl<sub>3</sub>) spectrum of 5aa

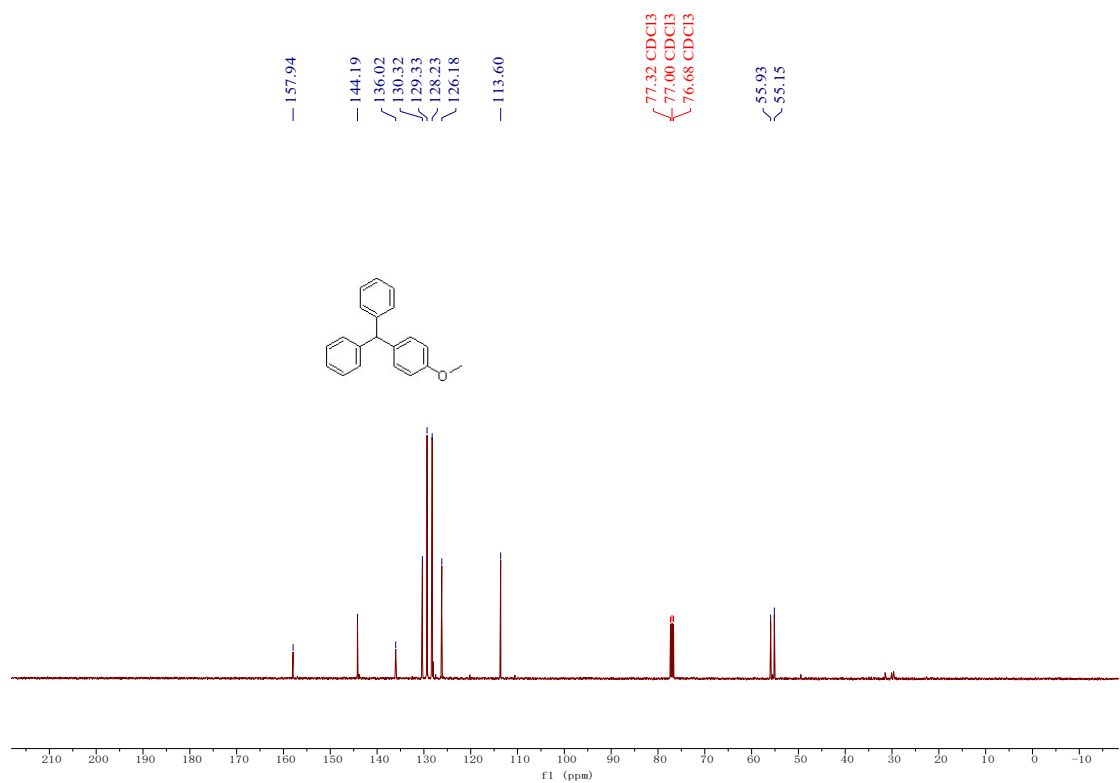

### <sup>1</sup>H NMR (400 MHz, CDCl<sub>3</sub>) spectrum of 5ab

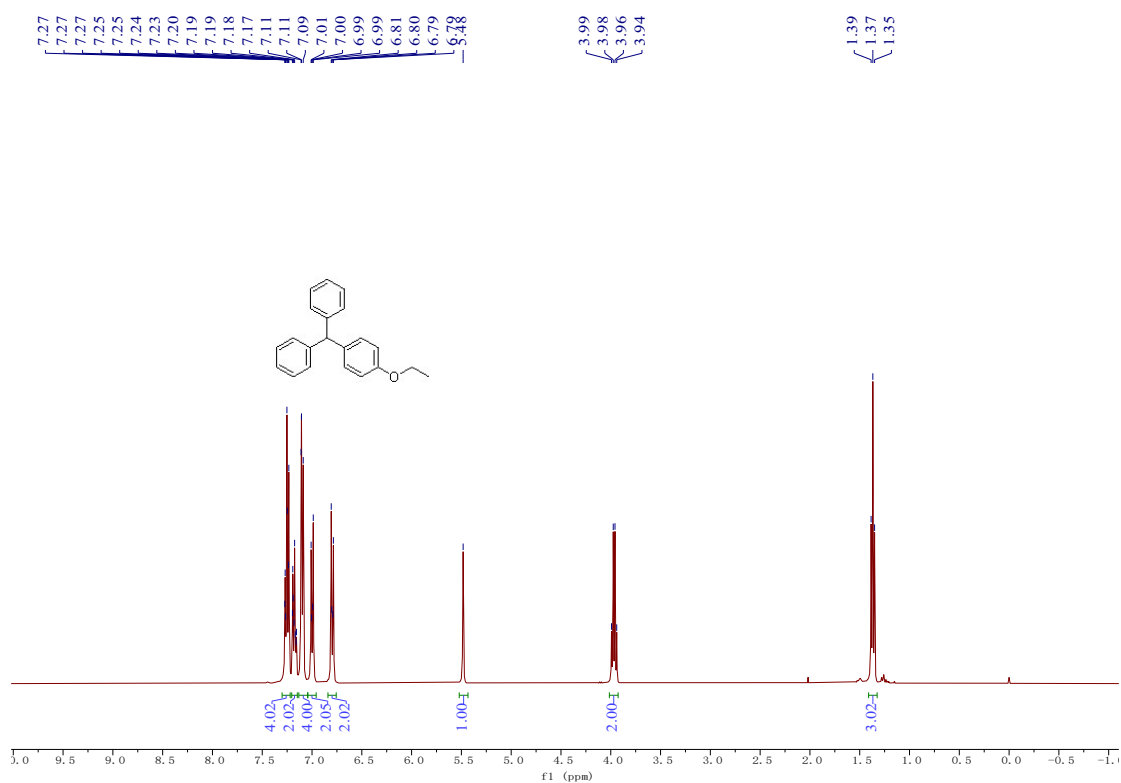

### <sup>13</sup>C NMR (100 MHz, CDCl<sub>3</sub>) spectrum of 5ab

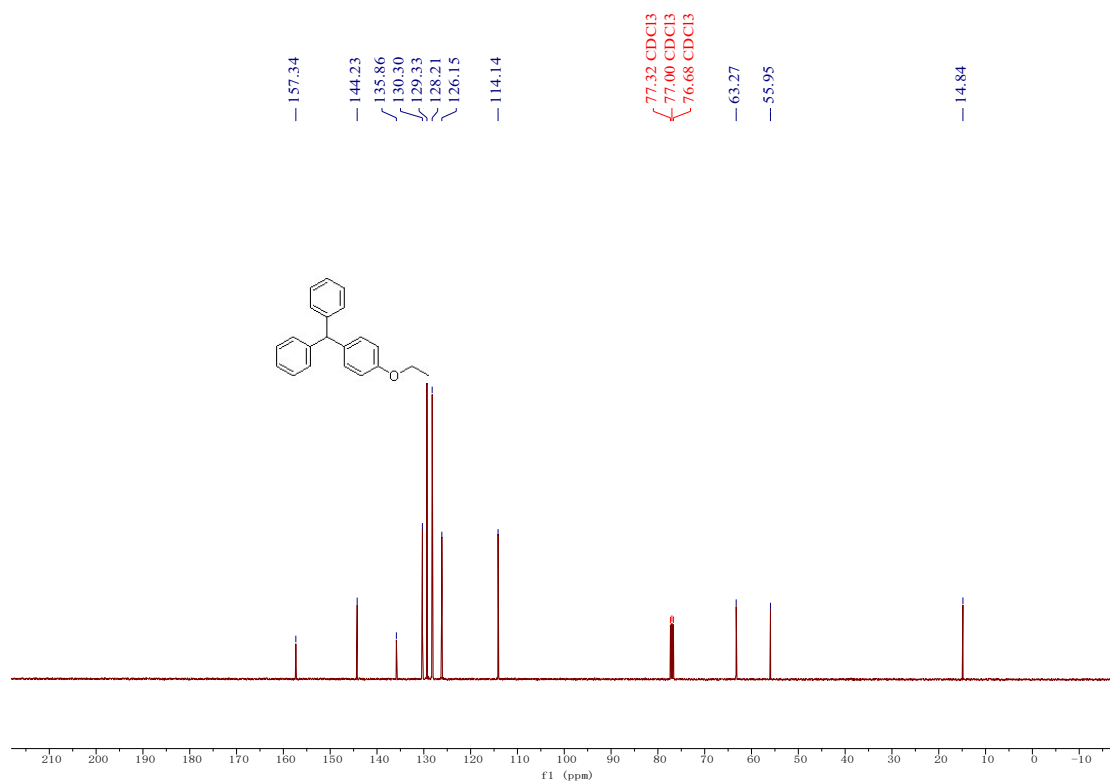

### <sup>1</sup>H NMR (400 MHz, CDCl<sub>3</sub>) spectrum of 5ac

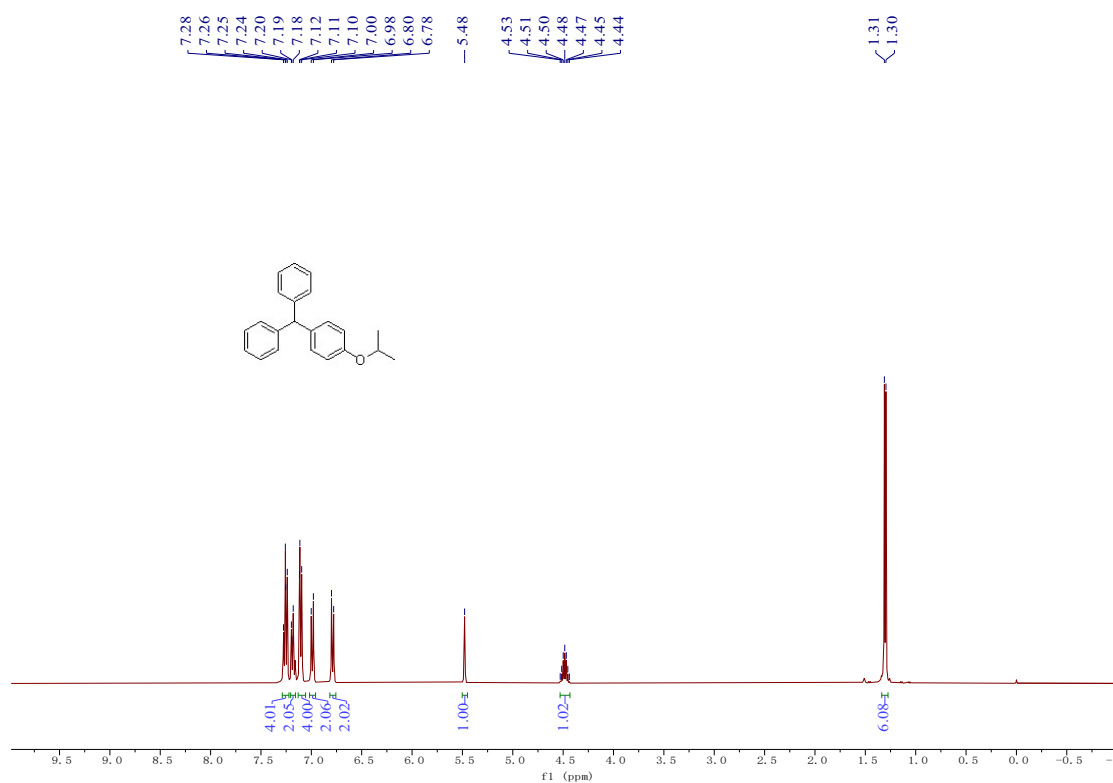

### <sup>13</sup>C NMR (100 MHz, CDCl<sub>3</sub>) spectrum of 5ac

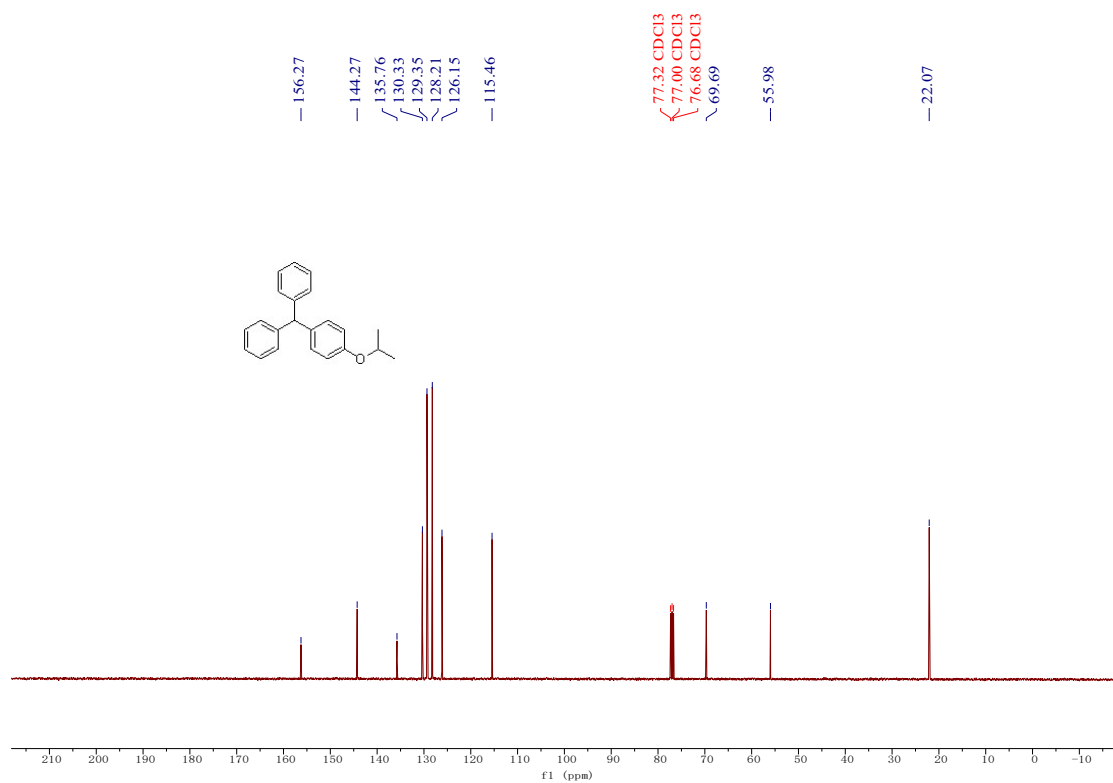

### <sup>1</sup>H NMR (400 MHz, CDCl<sub>3</sub>) spectrum of 5ad

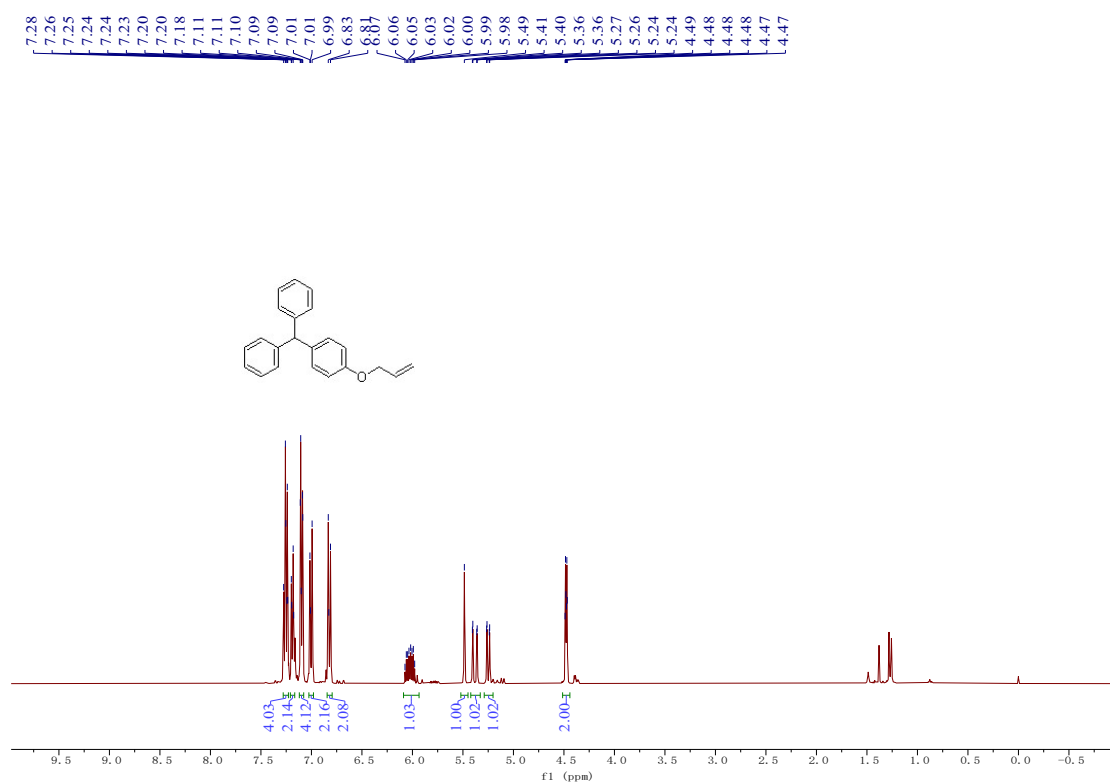

### <sup>13</sup>C NMR (100 MHz, CDCl<sub>3</sub>) spectrum of 5ad

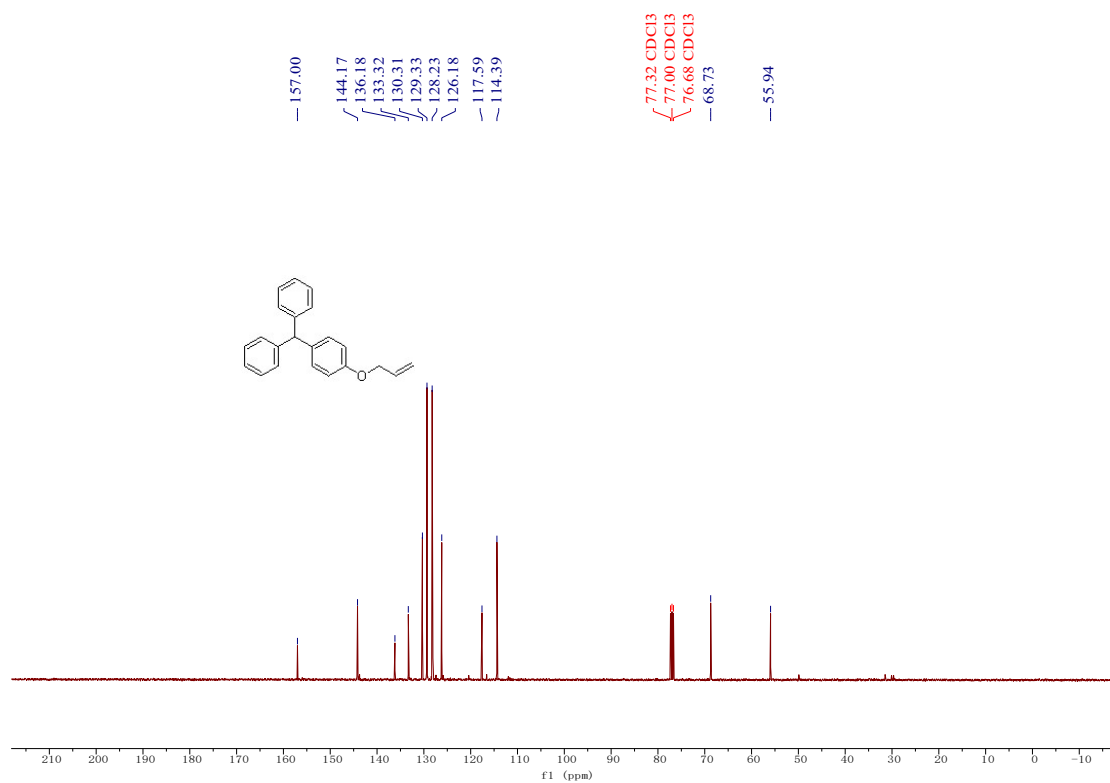

### <sup>1</sup>H NMR (400 MHz, CDCl<sub>3</sub>) spectrum of 5ae

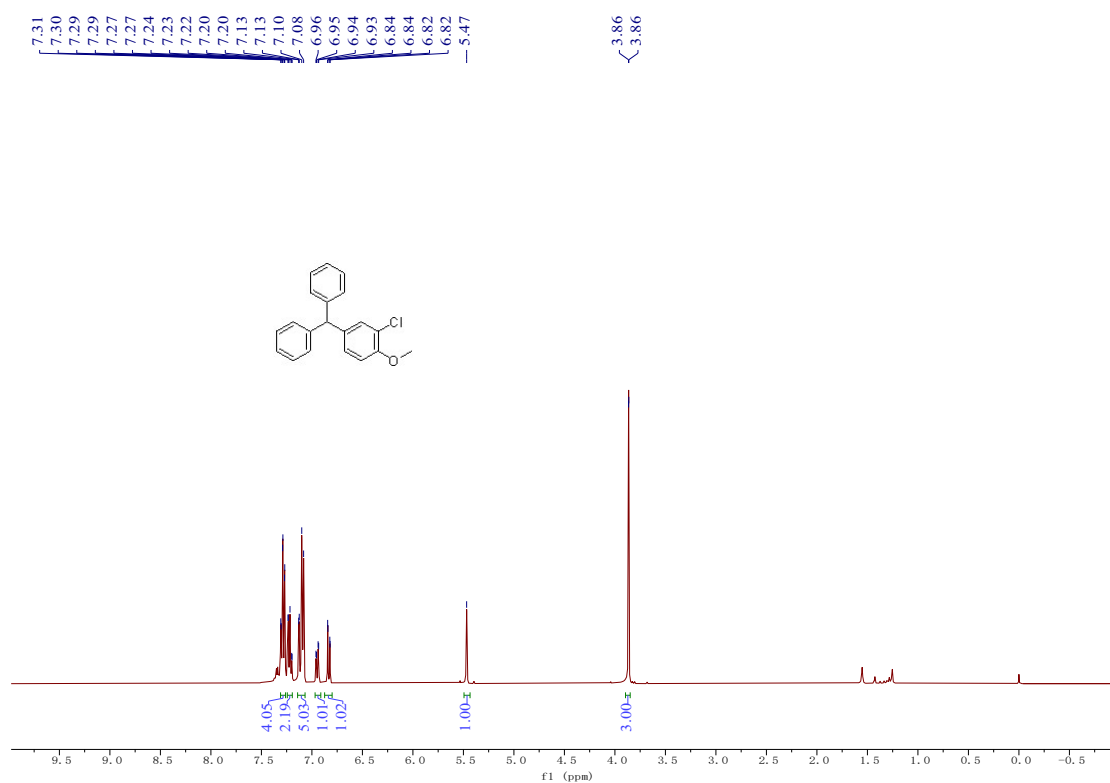

### <sup>13</sup>C NMR (100 MHz, CDCl<sub>3</sub>) spectrum of 5ae

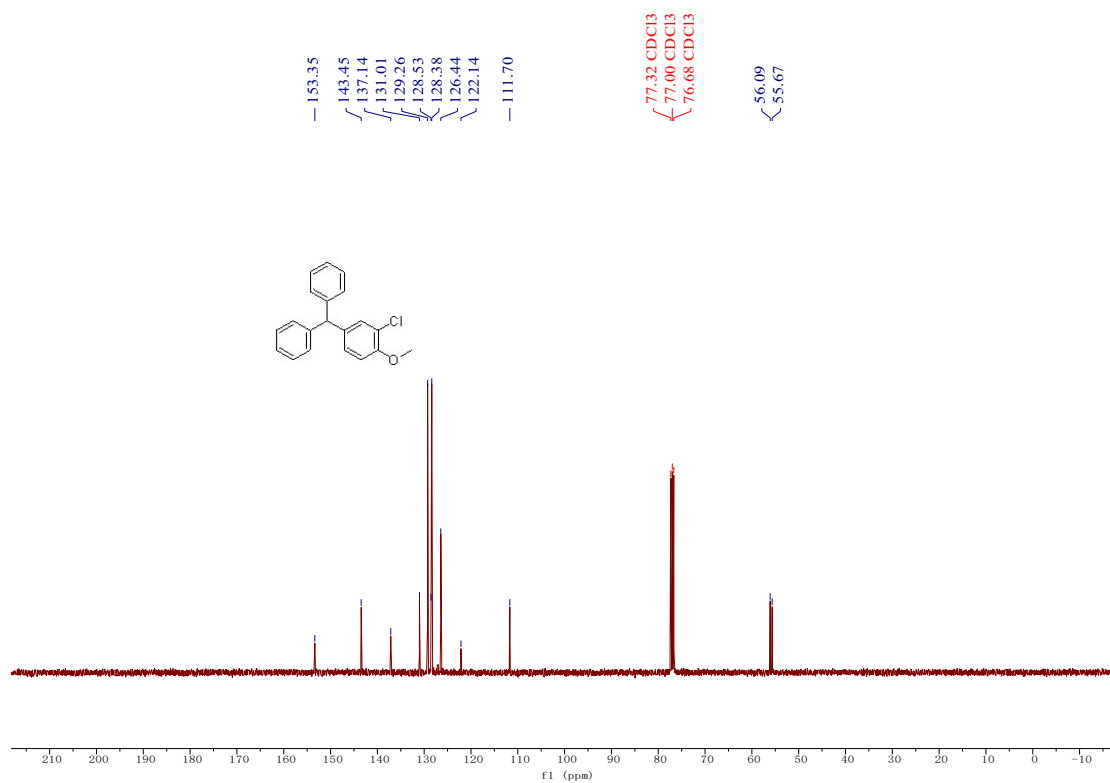



### <sup>1</sup>H NMR (400 MHz, CDCl<sub>3</sub>) spectrum of 5af

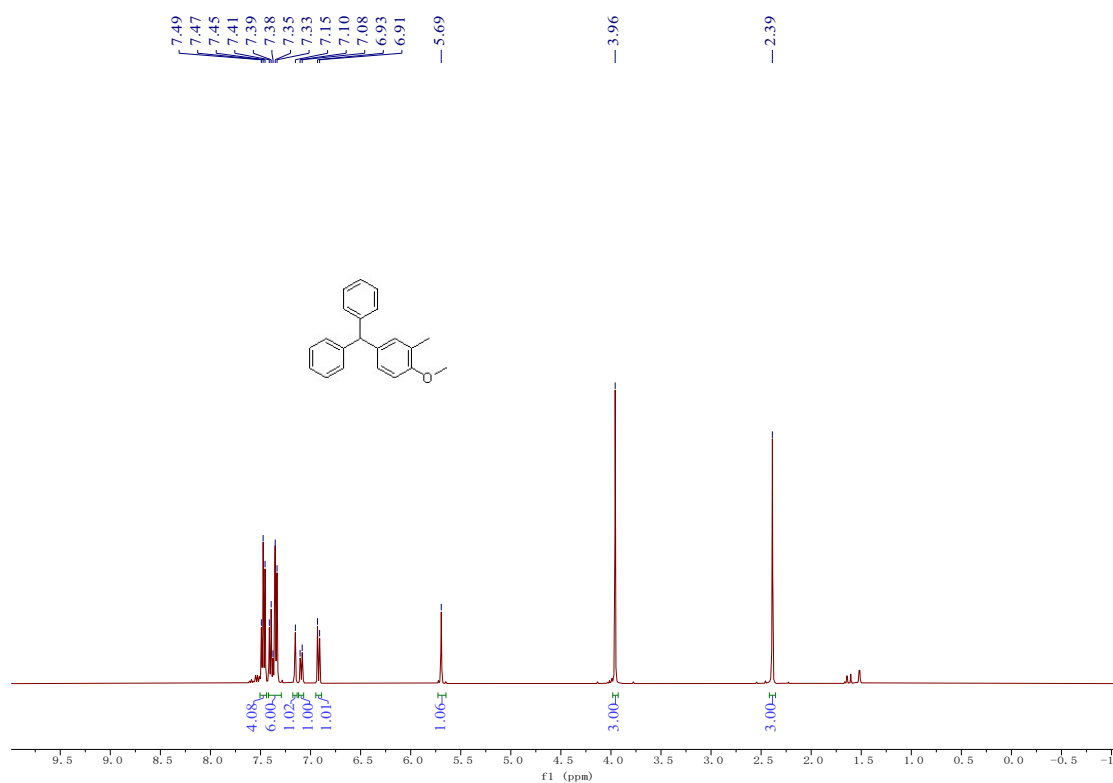

### <sup>13</sup>C NMR (100 MHz, CDCl<sub>3</sub>) spectrum of 5af

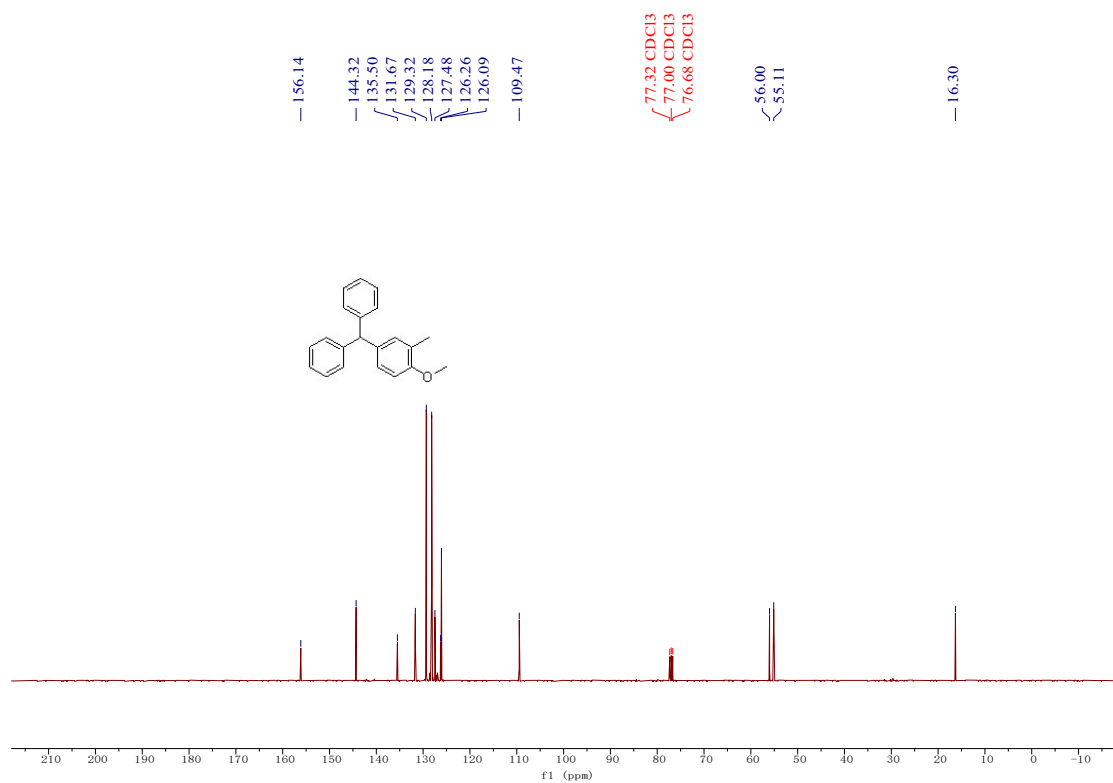

### <sup>1</sup>H NMR (400 MHz, CDCl<sub>3</sub>) spectrum of 5ag

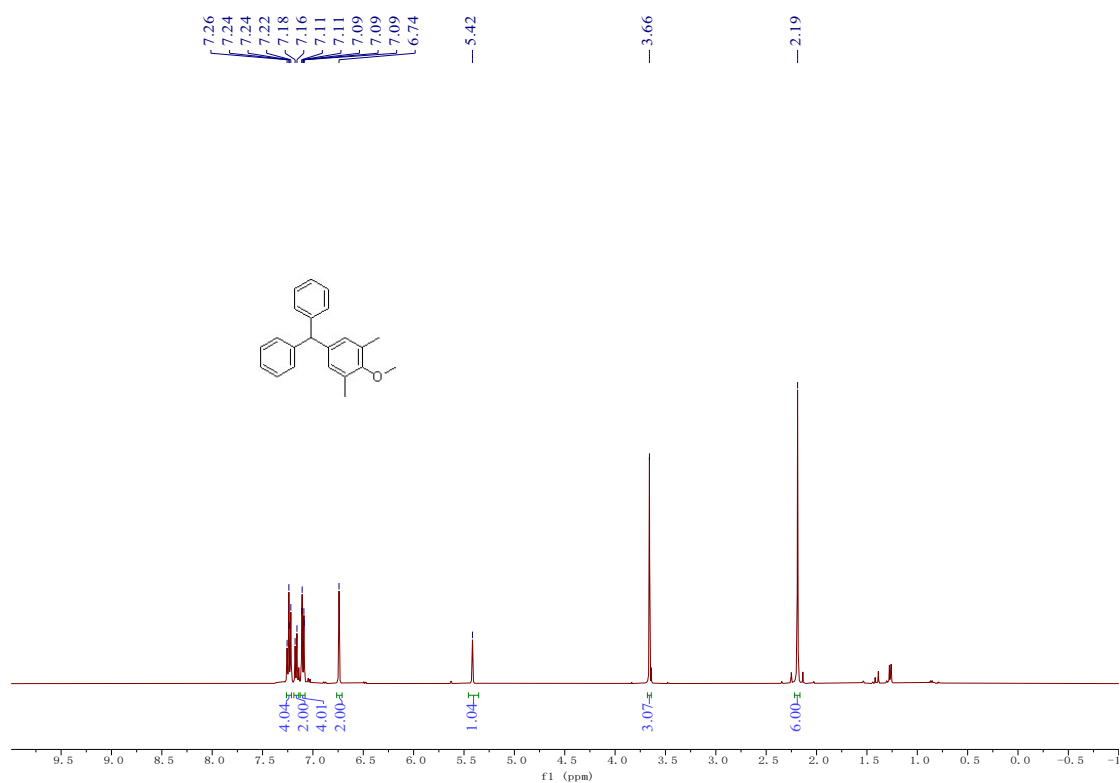

### <sup>13</sup>C NMR (100 MHz, CDCl<sub>3</sub>) spectrum of 5ag

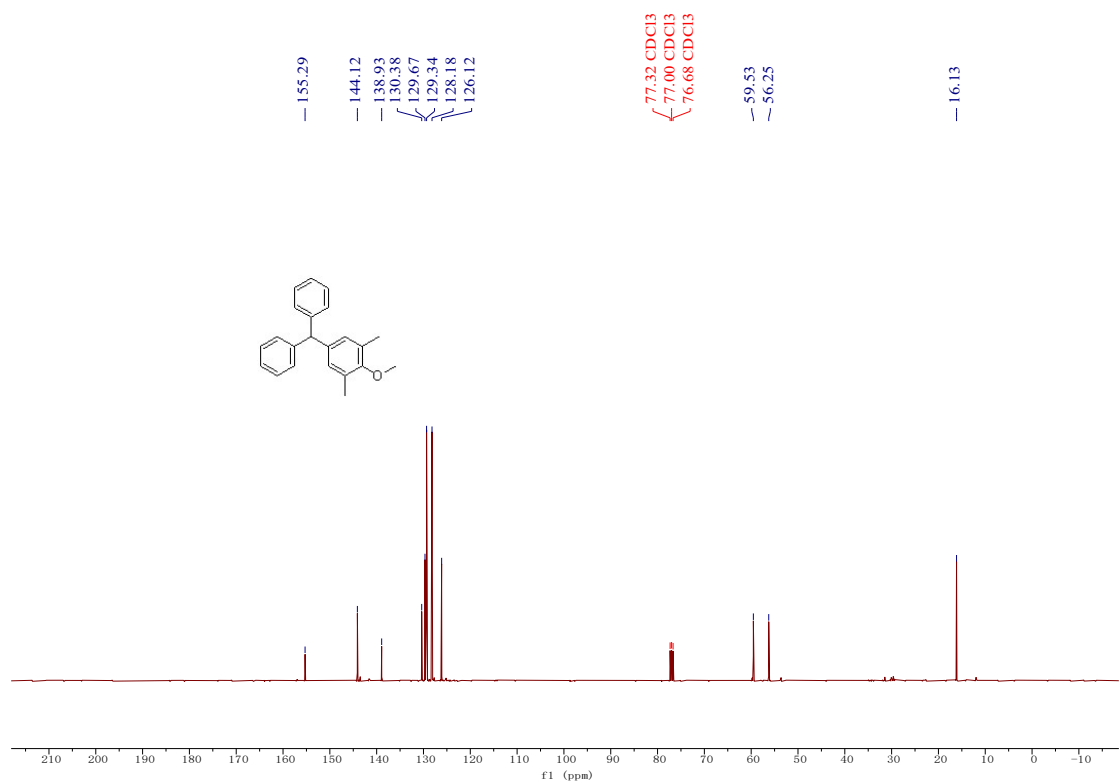

### <sup>1</sup>H NMR (400 MHz, CDCl<sub>3</sub>) spectrum of 5ah

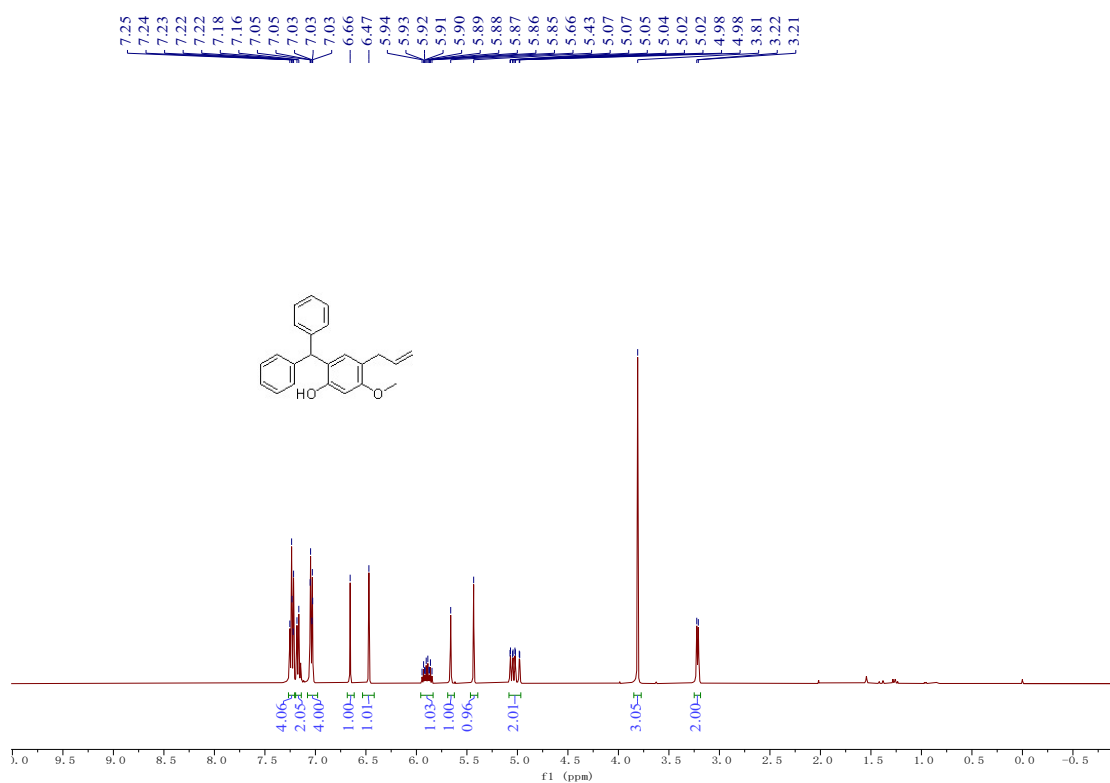

### <sup>13</sup>C NMR (100 MHz, CDCl<sub>3</sub>) spectrum of 5ah

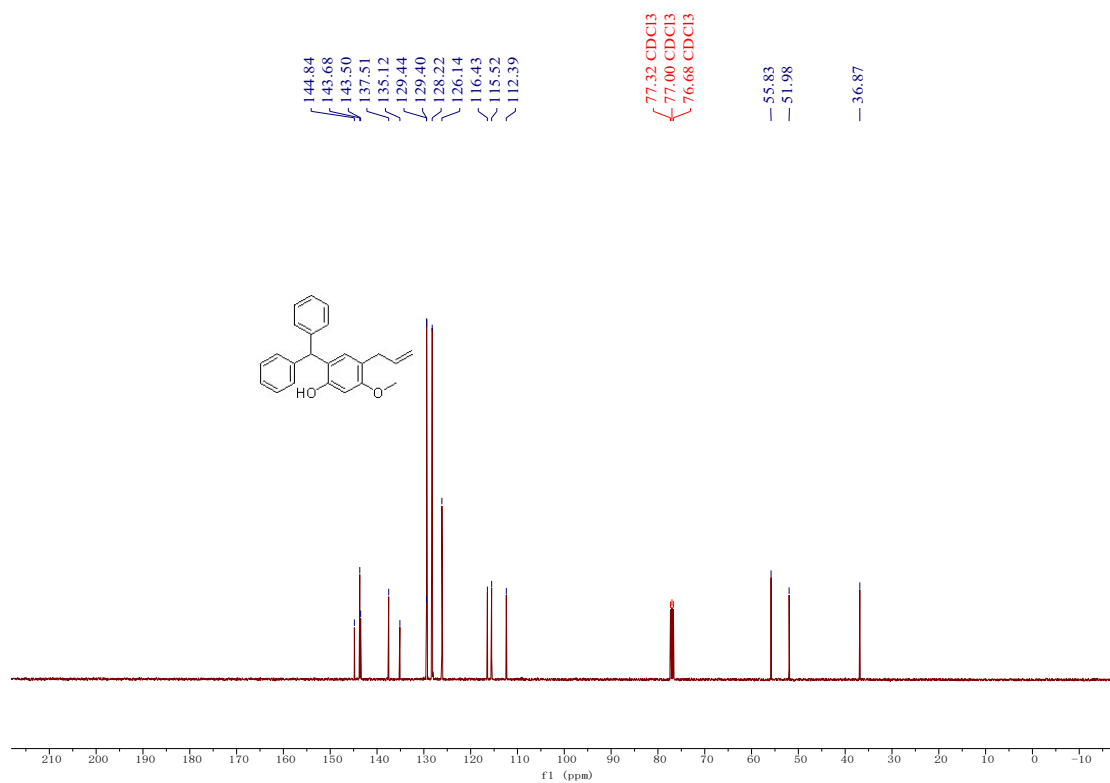

### <sup>1</sup>H NMR (400 MHz, CDCl<sub>3</sub>) spectrum of 5ai

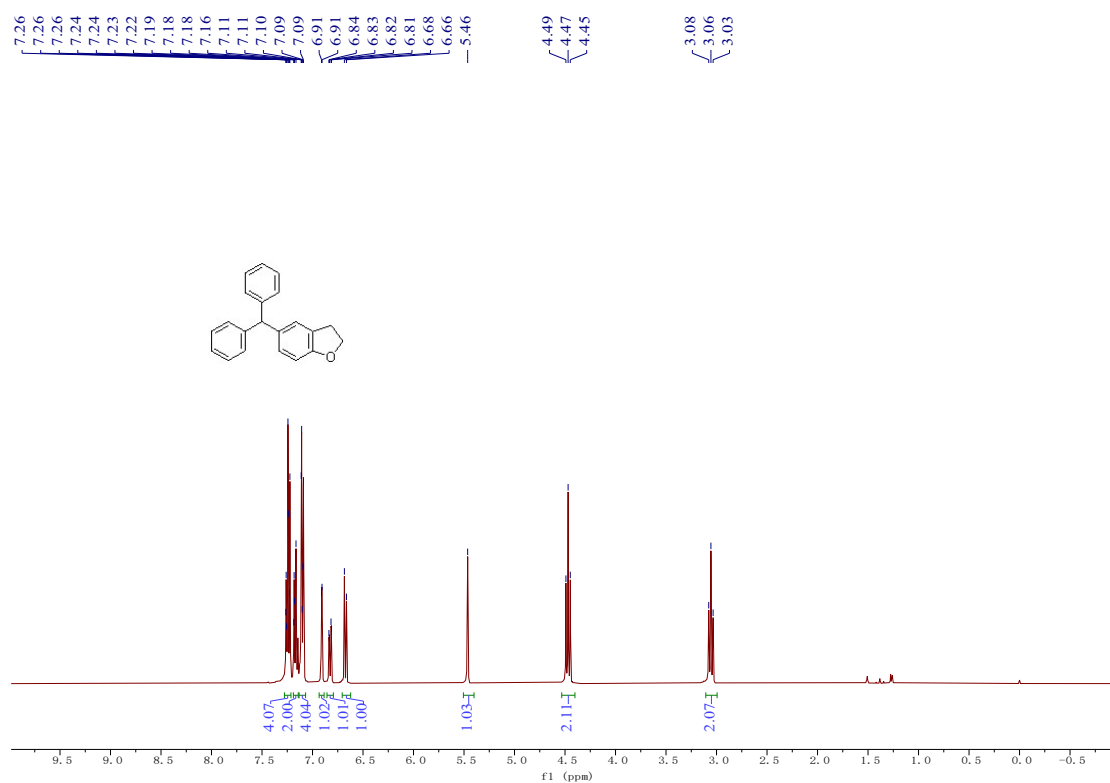

### <sup>13</sup>C NMR (100 MHz, CDCl<sub>3</sub>) spectrum of 5ai

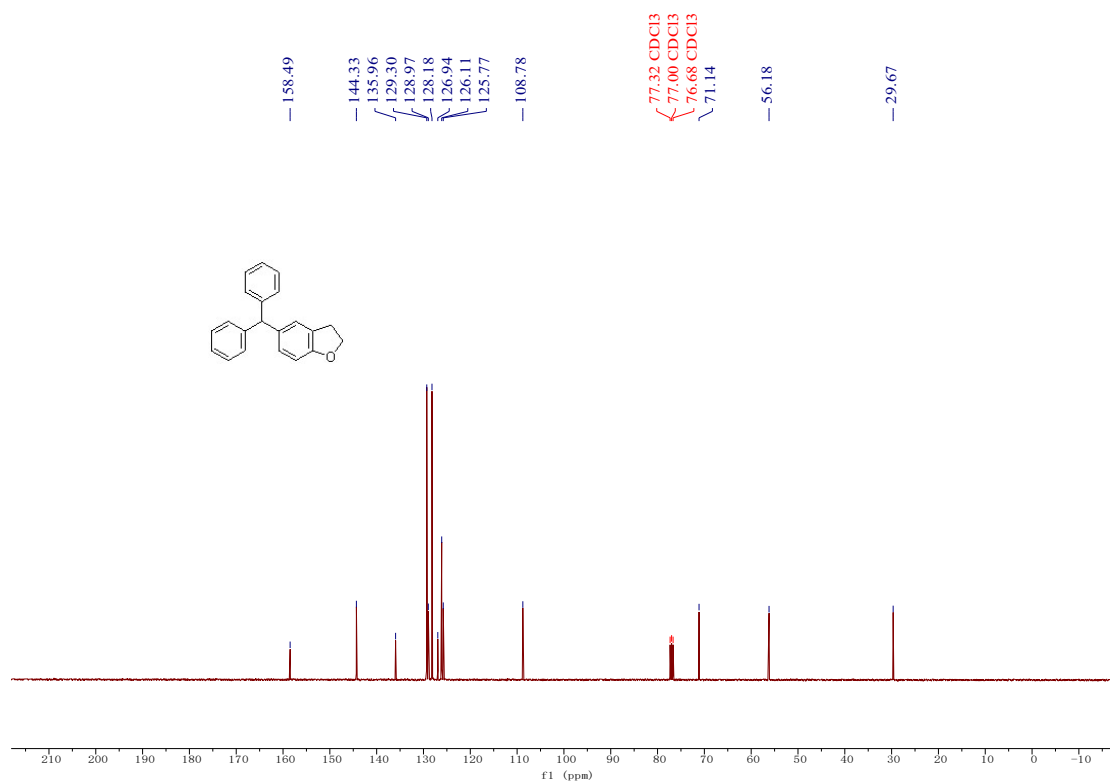

### <sup>1</sup>H NMR (400 MHz, CDCl<sub>3</sub>) spectrum of 5aj

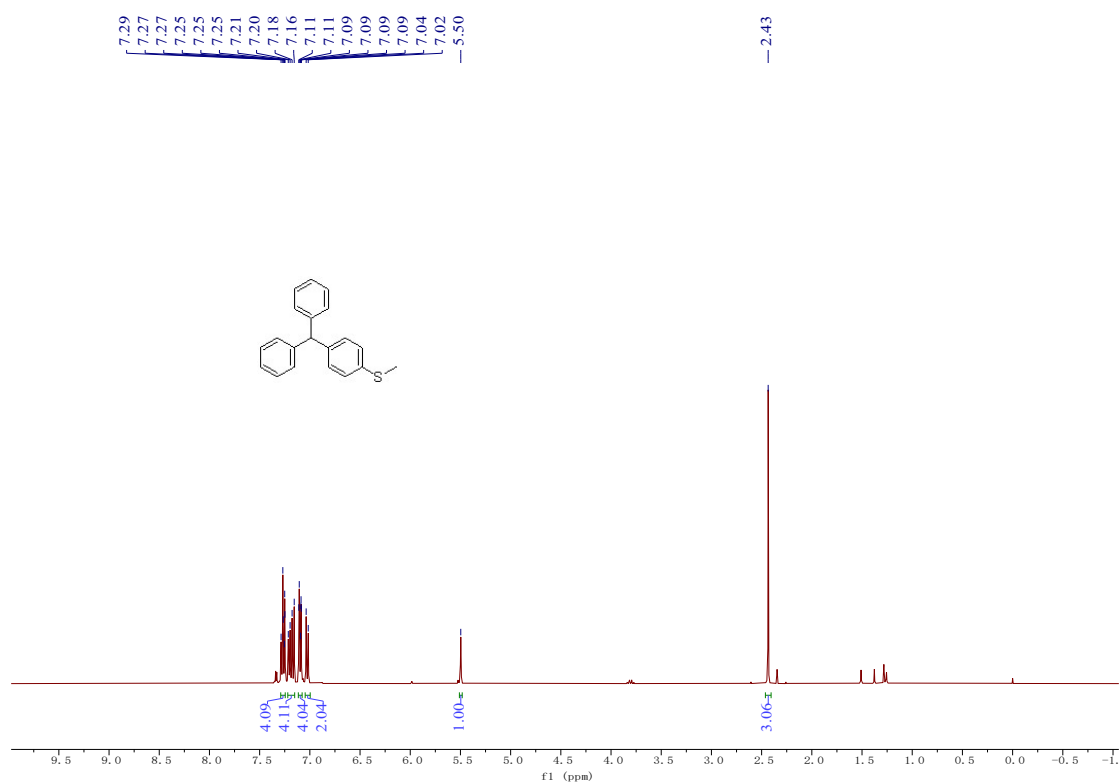

### <sup>13</sup>C NMR (100 MHz, CDCl<sub>3</sub>) spectrum of 5aj

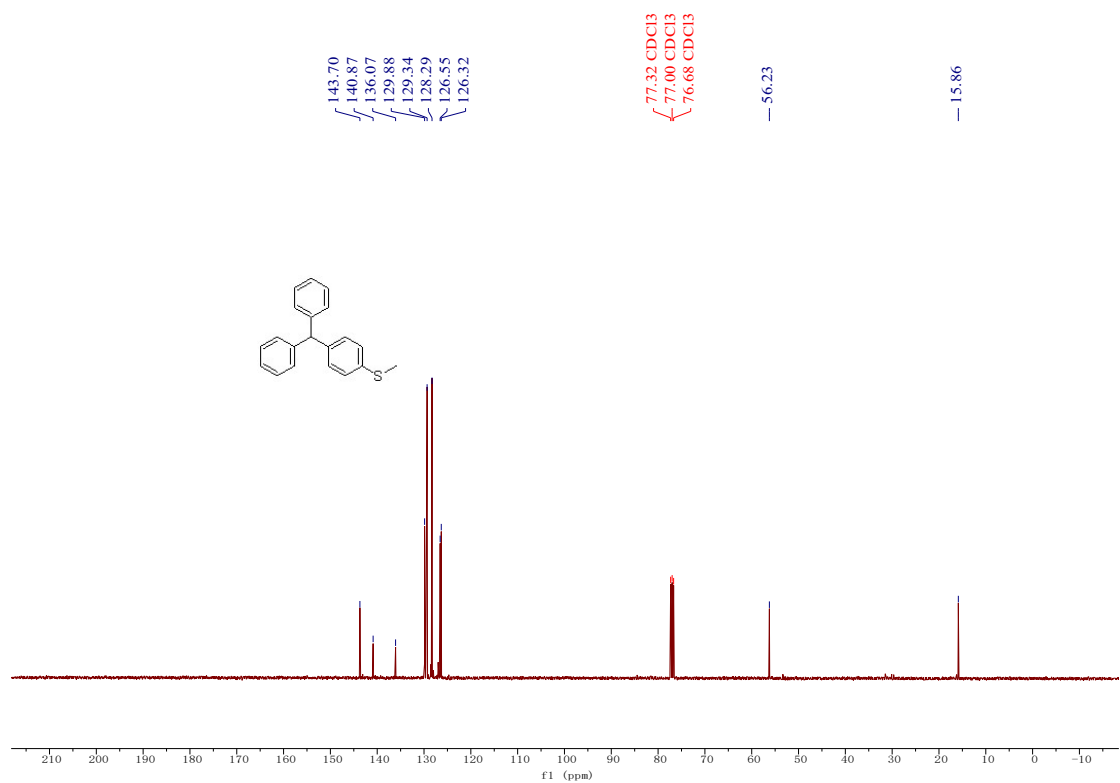

### <sup>1</sup>H NMR (400 MHz, CDCl<sub>3</sub>) spectrum of 5bk

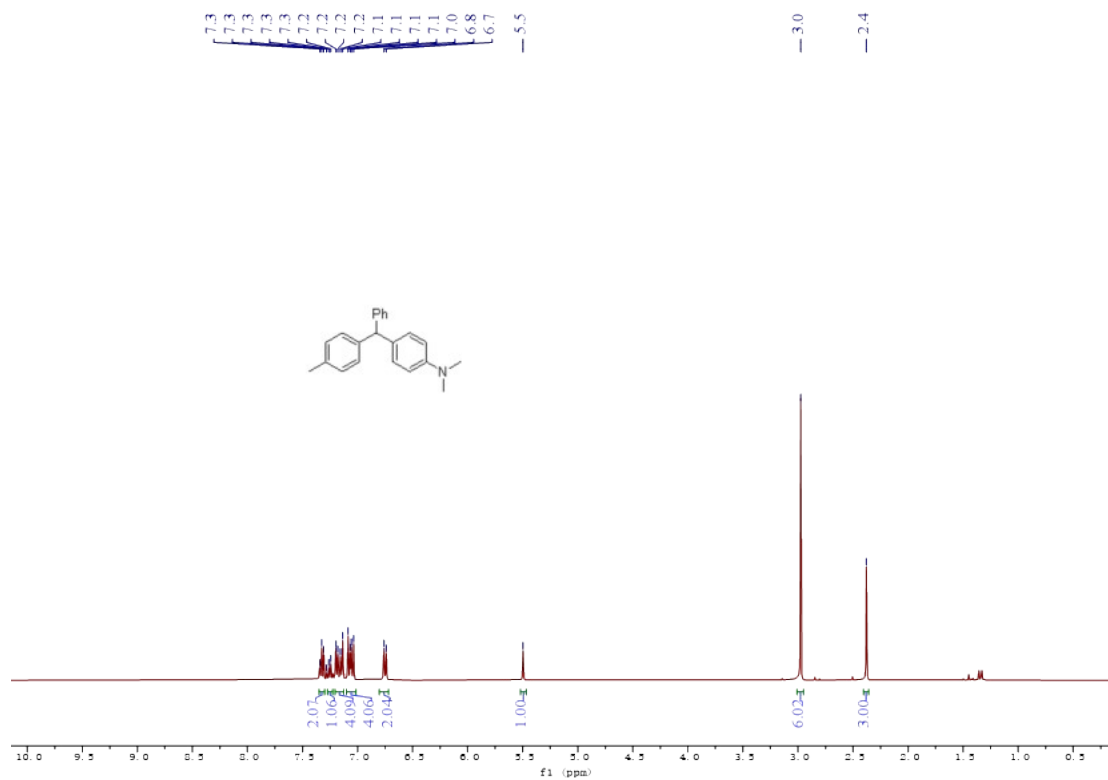

### <sup>13</sup>C NMR (100 MHz, CDCl<sub>3</sub>) spectrum of 5bk

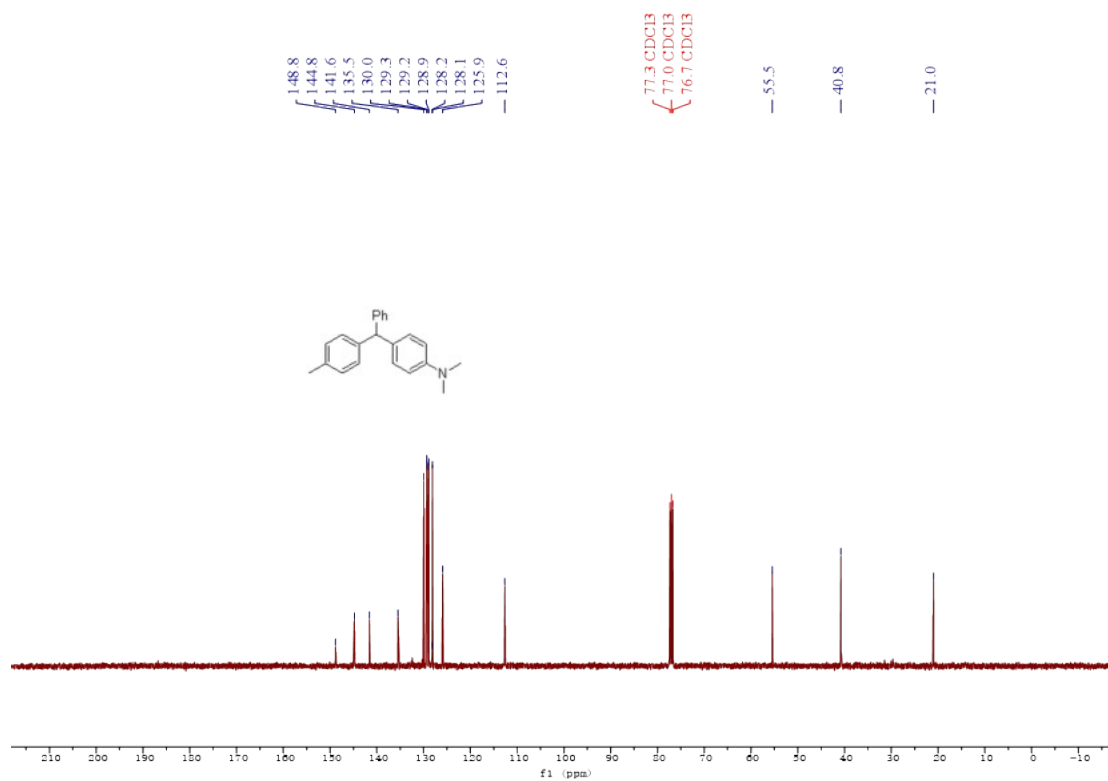

Supplement: d4ra04674a1.pdf [file d4ra04674a1.pdf]
